# Supplementary material for: Biosynthesis of azaphilones: a review
Source: Royal Society of Chemistry journal article supplement (doi:10.1039/d0np00080a), 2021-01-01
Supplement: d0np00080a1.xlsx [file d0np00080a1.xlsx]

## Sheet: Liste azaphilone
Pattern classification	Families and structures	Name	Producing strain	Molecular formula	Theoretical Neutral Mass	ref
Azaphilones with lactone ring		8,11-didehydrochermesinone B	Nigrospora sp. YE3033	C18H18O5	314.1154	Antiviral anthraquinones and azaphilones produced by an endophytic fungus Nigrospora sp. from Aconitum carmichaeli Shou-Peg Zhang et al. https://doi.org/10.1016/j.fitote.2016.05.013
Azaphilones with lactone ring		5′,6′-dihydroxyacetosellin	Epicoccum nigrum (strain 749)	C23H24O8	428.1471	Hufendiek, P., Stölben, S., Kehraus, S., Merten, N., Harms, H., Crüsemann, M., … König, G. (2017). Biosynthetic Studies on Acetosellin and Structure Elucidation of a New Acetosellin Derivative . Planta Medica, 83(12/13), 1044–1052. doi:10.1055/s-0042-124493
Azaphilones with lactone ring		Acetyl-monasfluol A	M. ruber M7	C23H28O7	416.1835	Chen W, Feng Y, Molnár I, Chen F. Nature and nurture: confluence of pathway determinism with metabolic and chemical serendipity diversifies Monascus azaphilone pigments. Nat Prod Rep. 17 avr 2019;36(4):561‑72.
Azaphilones with lactone ring		Acetyl-monasfluol B	fusarium sp. LN12 (endophytic)	C25H32O7	444.2148	Chen W, Feng Y, Molnár I, Chen F. Nature and nurture: confluence of pathway determinism with metabolic and chemical serendipity diversifies Monascus azaphilone pigments. Nat Prod Rep. 17 avr 2019;36(4):561‑72.
Azaphilones with lactone ring		Berkchaetoazaphilone A	Pleurostomophora sp.	C25H34O6	430.2355	Stierle, A. A., Stierle, D. B., Girtsman, T., Mou, T. C., Antczak, C., & Djaballah, H. (2015). Azaphilones from an Acid Mine Extremophile Strain of a Pleurostomophora sp. Journal of Natural Products, 78(12), 2917–2923. doi:10.1021/acs.jnatprod.5b00519
Azaphilones with lactone ring		Berkchaetoazaphilone B	Pleurostomophora sp.	C25H32O7	444.2148	Stierle, A. A., Stierle, D. B., Girtsman, T., Mou, T. C., Antczak, C., & Djaballah, H. (2015). Azaphilones from an Acid Mine Extremophile Strain of a Pleurostomophora sp. Journal of Natural Products, 78(12), 2917–2923. doi:10.1021/acs.jnatprod.5b00519
Azaphilones with lactone ring		bulgarialactone A	Bulgaria inquinans (Fr.) (Ascomycete) Bulgaria inquinans ICRM-184	C26H28O6	436.1886	Gao, J.-M., Yang, S.-X., & Qin, J.-C. (2013). Azaphilones: Chemistry and Biology. Chemical Reviews, 113(7), 4755–4811. doi:10.1021/cr300402y
Azaphilones with lactone ring		bulgarialactone B	Bulgaria inquinans (Fr.)	C26H28O7	452.1835	Gao, J.-M., Yang, S.-X., & Qin, J.-C. (2013). Azaphilones: Chemistry and Biology. Chemical Reviews, 113(7), 4755–4811. doi:10.1021/cr300402y
Azaphilones with lactone ring		bulgarialactone C	Bulgaria inquinans (Fr.) Bulgaria inquinans ICRM-184	C26H26O6	434.1729	Gao, J.-M., Yang, S.-X., & Qin, J.-C. (2013). Azaphilones: Chemistry and Biology. Chemical Reviews, 113(7), 4755–4811. doi:10.1021/cr300402y
Azaphilones with lactone ring		bulgarialactone D	Bulgaria inquinans ICRM-184	C26H30O7	454.1992	Gao, J.-M., Yang, S.-X., & Qin, J.-C. (2013). Azaphilones: Chemistry and Biology. Chemical Reviews, 113(7), 4755–4811. doi:10.1021/cr300402y
Azaphilones with lactone ring		Compound R3	Monascus sp.	C21H26O6	374.1729	Campoy S, Rumbero A, Martín JF, Liras P. Characterization of an hyperpigmenting mutant of Monascus purpureus IB1: identification of two novel pigment chemical structures. Appl Microbiol Biotechnol. 1 avr 2006;70(4):488‑96.
Azaphilones with lactone ring		pitholide A	Pithomyces sp. (marine-derived fungus)	C22H26O7	402.1679	Gao, J.-M., Yang, S.-X., & Qin, J.-C. (2013). Azaphilones: Chemistry and Biology. Chemical Reviews, 113(7), 4755–4811. doi:10.1021/cr300402y
Azaphilones with lactone ring		pitholide B	Pithomyces sp.	C22H26O6	386.1729	Gao, J.-M., Yang, S.-X., & Qin, J.-C. (2013). Azaphilones: Chemistry and Biology. Chemical Reviews, 113(7), 4755–4811. doi:10.1021/cr300402y
Azaphilones with lactone ring		pitholide C	Pithomyces sp.	C21H26O6	374.1729	Gao, J.-M., Yang, S.-X., & Qin, J.-C. (2013). Azaphilones: Chemistry and Biology. Chemical Reviews, 113(7), 4755–4811. doi:10.1021/cr300402y
Azaphilones with lactone ring		pitholide D	Pithomyces sp.	C21H26O5	358.1780	Gao, J.-M., Yang, S.-X., & Qin, J.-C. (2013). Azaphilones: Chemistry and Biology. Chemical Reviews, 113(7), 4755–4811. doi:10.1021/cr300402y
Azaphilones with lactone ring		epicocconone	Epicoccum nigrum	C23H22O7	410.1366	Gao, J.-M., Yang, S.-X., & Qin, J.-C. (2013). Azaphilones: Chemistry and Biology. Chemical Reviews, 113(7), 4755–4811. doi:10.1021/cr300402y
Azaphilones with lactone ring		sequoiatone A	Aspergillus parasiticus RDWD1−-2 (endophyte) Penicillium sp. JP-1 (endophyte)	C23H30O6	402.2042	Gao, J.-M., Yang, S.-X., & Qin, J.-C. (2013). Azaphilones: Chemistry and Biology. Chemical Reviews, 113(7), 4755–4811. doi:10.1021/cr300402y
Azaphilones with lactone ring		chaetoviridine H	Chaetomium globosum	C23H26O6	398.1729	Gao, J.-M., Yang, S.-X., & Qin, J.-C. (2013). Azaphilones: Chemistry and Biology. Chemical Reviews, 113(7), 4755–4811. doi:10.1021/cr300402y
Azaphilones with lactone ring		cohaerin C	Annulohypoxylon cohaerens	C28H34O7	482.2305	Surup, F., Mohr, K. I., Jansen, R., & Stadler, M. (2013). Cohaerins G–K, azaphilone pigments from Annulohypoxylon cohaerens and absolute stereochemistry of cohaerins C–K. Phytochemistry, 95, 252–258. doi:10.1016/j.phytochem.2013.07.027
Azaphilones with lactone ring		cohaerin D	Annulohypoxylon cohaerens	C28H32O7	480.2148	Surup, F., Mohr, K. I., Jansen, R., & Stadler, M. (2013). Cohaerins G–K, azaphilone pigments from Annulohypoxylon cohaerens and absolute stereochemistry of cohaerins C–K. Phytochemistry, 95, 252–258. doi:10.1016/j.phytochem.2013.07.027
Azaphilones with lactone ring		cohaerin E	Annulohypoxylon cohaerens	C28H30O6	462.2042	Surup, F., Mohr, K. I., Jansen, R., & Stadler, M. (2013). Cohaerins G–K, azaphilone pigments from Annulohypoxylon cohaerens and absolute stereochemistry of cohaerins C–K. Phytochemistry, 95, 252–258. doi:10.1016/j.phytochem.2013.07.027
Azaphilones with lactone ring		multiformin A	Hypoxylon multiforme	C24H26O6	410.1729	Gao, J.-M., Yang, S.-X., & Qin, J.-C. (2013). Azaphilones: Chemistry and Biology. Chemical Reviews, 113(7), 4755–4811. doi:10.1021/cr300402y
Azaphilones with lactone ring		multiformin B	Hypoxylon multiforme	C24H24O6	408.1573	Gao, J.-M., Yang, S.-X., & Qin, J.-C. (2013). Azaphilones: Chemistry and Biology. Chemical Reviews, 113(7), 4755–4811. doi:10.1021/cr300402y
Azaphilones with lactone ring		multiformin C	Hypoxylon multiforme	C24H22O6	406.1416	Gao, J.-M., Yang, S.-X., & Qin, J.-C. (2013). Azaphilones: Chemistry and Biology. Chemical Reviews, 113(7), 4755–4811. doi:10.1021/cr300402y
Azaphilones with lactone ring		multiformin D	Hypoxylon multiforme	C24H26O7	426.1679	Gao, J.-M., Yang, S.-X., & Qin, J.-C. (2013). Azaphilones: Chemistry and Biology. Chemical Reviews, 113(7), 4755–4811. doi:10.1021/cr300402y
Azaphilones with lactone ring		longirostrerone A	Chaetomium longirostre	C32H40O7	536.2774	Gao, J.-M., Yang, S.-X., & Qin, J.-C. (2013). Azaphilones: Chemistry and Biology. Chemical Reviews, 113(7), 4755–4811. doi:10.1021/cr300402y
Azaphilones with lactone ring	revised structure	longirostrerone C	Chaetomium longirostre	C32H38O6	518.2668	Stierle, A.A., Stierle, D.B., Girtsman, T., Mou, T.C., Antczak, C., Djaballah, H., (2015). Azaphilones from an Acid Mine Extremophile Strain of a Pleurostomophora sp. J. Nat. Prod. 78, 2917–2923. https://doi.org/10.1021/acs.jnatprod.5b00519
Azaphilones with lactone ring		longirostrerone D	Chaetomium longirostre	C32H38O7	534.2618	Gao, J.-M., Yang, S.-X., & Qin, J.-C. (2013). Azaphilones: Chemistry and Biology. Chemical Reviews, 113(7), 4755–4811. doi:10.1021/cr300402y
Azaphilones with lactone ring		Cohaerin G	Annulohypoxylon cohaerens	C28H36O7	484.2461	Surup, F., Mohr, K. I., Jansen, R., & Stadler, M. (2013). Cohaerins G–K, azaphilone pigments from Annulohypoxylon cohaerens and absolute stereochemistry of cohaerins C–K. Phytochemistry, 95, 252–258. doi:10.1016/j.phytochem.2013.07.027
Azaphilones with lactone ring		Cohaerin H	Annulohypoxylon cohaerens	C28H32O6	464.2199	Surup, F., Mohr, K. I., Jansen, R., & Stadler, M. (2013). Cohaerins G–K, azaphilone pigments from Annulohypoxylon cohaerens and absolute stereochemistry of cohaerins C–K. Phytochemistry, 95, 252–258. doi:10.1016/j.phytochem.2013.07.027
Azaphilones with lactone ring		colletotrichone B	Colletotrichum sp. BS4	C18H20O5	316.1311	Wang, W.-X., Kusari, S., Laatsch, H., Golz, C., Kusari, P., Strohmann, C., … Spiteller, M. (2016). Antibacterial Azaphilones from an Endophytic Fungus, Colletotrichum sp. BS4. Journal of Natural Products, 79(4), 704–710. doi:10.1021/acs.jnatprod.5b00436
Azaphilones with lactone ring		colletotrichone C	Colletotrichum sp. BS4	C18H22O5	318.1467	Wang, W.-X., Kusari, S., Laatsch, H., Golz, C., Kusari, P., Strohmann, C., … Spiteller, M. (2016). Antibacterial Azaphilones from an Endophytic Fungus, Colletotrichum sp. BS4. Journal of Natural Products, 79(4), 704–710. doi:10.1021/acs.jnatprod.5b00436
Azaphilones with lactone ring		Coniellin A	Coniella fragariae	C22H24O6	384.1573	Yu, H., Sperlich, J., Mándi, A., Kurtán, T., Dai, H., Teusch, N., … Proksch, P. (2018). Azaphilone Derivatives from the Fungus Coniella fragariae Inhibit NF-κB Activation and Reduce Tumor Cell Migration. Journal of Natural Products. doi:10.1021/acs.jnatprod.8b00540
Azaphilones with lactone ring		Coniellin B	Coniella fragariae	C22H26O6	386.1729	Yu, H., Sperlich, J., Mándi, A., Kurtán, T., Dai, H., Teusch, N., … Proksch, P. (2018). Azaphilone Derivatives from the Fungus Coniella fragariae Inhibit NF-κB Activation and Reduce Tumor Cell Migration. Journal of Natural Products. doi:10.1021/acs.jnatprod.8b00540
Azaphilones with lactone ring		Coniellin C	Coniella fragariae	C23H28O7	416.1835	Yu, H., Sperlich, J., Mándi, A., Kurtán, T., Dai, H., Teusch, N., … Proksch, P. (2018). Azaphilone Derivatives from the Fungus Coniella fragariae Inhibit NF-κB Activation and Reduce Tumor Cell Migration. Journal of Natural Products. doi:10.1021/acs.jnatprod.8b00540
Azaphilones with lactone ring	revised structure	deflectin A-1a	Aspergillus deflectus Aspergillus deflectus CBS 109.55	C21H24O5	356.1624	Pyser, J.B., Baker Dockrey, S.A., Benítez, A.R., Joyce, L.A., Wiscons, R.A., Smith, J.L., Narayan, A.R.H., (2019). Stereodivergent, Chemoenzymatic Synthesis of Azaphilone Natural Products. J. Am. Chem. Soc. 141, 18551–18559. https://doi.org/10.1021/jacs.9b09385
Azaphilones with lactone ring		geumsanol B	Penicillium sp. KCB11A109	C23H28O7	416.1835	Son, S., Ko, S.-K., Kim, J. W., Lee, J. K., Jang, M., Ryoo, I.-J., … Ahn, J. S. (2016). Structures and biological activities of azaphilones produced by Penicillium sp. KCB11A109 from a ginseng field. Phytochemistry, 122, 154–164. doi:10.1016/j.phytochem.2015.12.008
Azaphilones with lactone ring		monochaetin	Monochaetia compta PRL 1754	C18H20O5	316.1311	Gao, J.-M., Yang, S.-X., & Qin, J.-C. (2013). Azaphilones: Chemistry and Biology. Chemical Reviews, 113(7), 4755–4811. doi:10.1021/cr300402y
Azaphilones with lactone ring		chermesinone B	Penicillium chermesinum ZH4-E2	C18H20O5	316.1311	Gao, J.-M., Yang, S.-X., & Qin, J.-C. (2013). Azaphilones: Chemistry and Biology. Chemical Reviews, 113(7), 4755–4811. doi:10.1021/cr300402y
Azaphilones with lactone ring		chermesinone C	Penicillium chermesinum ZH4-E2	C18H22O6	334.1416	Gao, J.-M., Yang, S.-X., & Qin, J.-C. (2013). Azaphilones: Chemistry and Biology. Chemical Reviews, 113(7), 4755–4811. doi:10.1021/cr300402y
Azaphilones with lactone ring		deflectin A-1b	Aspergillus deflectus Aspergillus deflectus CBS 109.55	C23H28O5	384.1937	Gao, J.-M., Yang, S.-X., & Qin, J.-C. (2013). Azaphilones: Chemistry and Biology. Chemical Reviews, 113(7), 4755–4811. doi:10.1021/cr300402y
Azaphilones with lactone ring		deflectin A-1c	Aspergillus deflectus Aspergillus deflectus CBS 109.55	C25H32O5	412.2250	Gao, J.-M., Yang, S.-X., & Qin, J.-C. (2013). Azaphilones: Chemistry and Biology. Chemical Reviews, 113(7), 4755–4811. doi:10.1021/cr300402y
Azaphilones with lactone ring		deflectin B-2a	Aspergillus deflectus Aspergillus deflectus CBS 109.55	C24H30O5	398.2093	Gao, J.-M., Yang, S.-X., & Qin, J.-C. (2013). Azaphilones: Chemistry and Biology. Chemical Reviews, 113(7), 4755–4811. doi:10.1021/cr300402y
Azaphilones with lactone ring		deflectin B-2b	Aspergillus deflectus Aspergillus deflectus CBS 109.55	C26H34O5	426.2406	Gao, J.-M., Yang, S.-X., & Qin, J.-C. (2013). Azaphilones: Chemistry and Biology. Chemical Reviews, 113(7), 4755–4811. doi:10.1021/cr300402y
Azaphilones with lactone ring		MC-2	mppc mutant of M. purpureus KACC	C21H22O5	354.1467	Chen W, Feng Y, Molnár I, Chen F. Nature and nurture: confluence of pathway determinism with metabolic and chemical serendipity diversifies Monascus azaphilone pigments. Nat Prod Rep. 17 avr 2019;36(4):561‑72.
Azaphilones with lactone ring		MC-4	mppc mutant of M. purpureus KACC	C23H26O5	382.1780	Chen W, Feng Y, Molnár I, Chen F. Nature and nurture: confluence of pathway determinism with metabolic and chemical serendipity diversifies Monascus azaphilone pigments. Nat Prod Rep. 17 avr 2019;36(4):561‑72.
Azaphilones with lactone ring		Minutellin A	Annulohypoxylon minutellum	C27H30O7	466.1992	Kuhnert, E., Surup, F., Halecker, S., & Stadler, M. (2017). Minutellins A – D, azaphilones from the stromata of Annulohypoxylon minutellum (Xylariaceae). Phytochemistry, 137, 66–71. doi:10.1016/j.phytochem.2017.02.014
Azaphilones with lactone ring		Minutellin B	Annulohypoxylon minutellum	C25H26O7	438.1679	Kuhnert, E., Surup, F., Halecker, S., & Stadler, M. (2017). Minutellins A – D, azaphilones from the stromata of Annulohypoxylon minutellum (Xylariaceae). Phytochemistry, 137, 66–71. doi:10.1016/j.phytochem.2017.02.014
Azaphilones with lactone ring		Minutellin C	Annulohypoxylon minutellum	C27H28O6	448.1887	Kuhnert, E., Surup, F., Halecker, S., & Stadler, M. (2017). Minutellins A – D, azaphilones from the stromata of Annulohypoxylon minutellum (Xylariaceae). Phytochemistry, 137, 66–71. doi:10.1016/j.phytochem.2017.02.014
Azaphilones with lactone ring		Minutellin D	Annulohypoxylon minutellum	C29H32O6	476.2199	Kuhnert, E., Surup, F., Halecker, S., & Stadler, M. (2017). Minutellins A – D, azaphilones from the stromata of Annulohypoxylon minutellum (Xylariaceae). Phytochemistry, 137, 66–71. doi:10.1016/j.phytochem.2017.02.014
Azaphilones with lactone ring		Monakaocinol	Monascus kaoliang	C23H32O5	388.2250	Cheng, M.-J., Wu, M.-D., Chan, H.-Y., Chang, H.-S., Wu, H.-C., Chen, J.-J., … Lin, H.-C. (2019). A New Azaphilone Derivative from the Monascus kaoliang Fermented Rice. Chemistry of Natural Compounds. doi:10.1007/s10600-019-02617-7
Azaphilones with lactone ring		Monaphilol A	Monascus purpureus NTU 568	C23H28O5	384.1937	Hsu, L.-C., Liang, Y.-H., Hsu, Y.-W., Kuo, Y.-H., & Pan, T.-M. (2013). Anti-inflammatory Properties of Yellow and Orange Pigments from Monascus purpureus NTU 568. Journal of Agricultural and Food Chemistry, 61(11), 2796–2802. doi:10.1021/jf305521v
Azaphilones with lactone ring		Monaphilol B	Monascus purpureus NTU 568	C21H24O5	356.1624	Hsu, L.-C., Liang, Y.-H., Hsu, Y.-W., Kuo, Y.-H., & Pan, T.-M. (2013). Anti-inflammatory Properties of Yellow and Orange Pigments from Monascus purpureus NTU 568. Journal of Agricultural and Food Chemistry, 61(11), 2796–2802. doi:10.1021/jf305521v
Azaphilones with lactone ring		Monaphilol C	Monascus purpureus NTU 568	C26H32O6	440.2199	Hsu, L.-C., Liang, Y.-H., Hsu, Y.-W., Kuo, Y.-H., & Pan, T.-M. (2013). Anti-inflammatory Properties of Yellow and Orange Pigments from Monascus purpureus NTU 568. Journal of Agricultural and Food Chemistry, 61(11), 2796–2802. doi:10.1021/jf305521v
Azaphilones with lactone ring		Monaphilol D	Monascus purpureus NTU 568	C24H28O6	412.1886	Hsu, L.-C., Liang, Y.-H., Hsu, Y.-W., Kuo, Y.-H., & Pan, T.-M. (2013). Anti-inflammatory Properties of Yellow and Orange Pigments from Monascus purpureus NTU 568. Journal of Agricultural and Food Chemistry, 61(11), 2796–2802. doi:10.1021/jf305521v
Azaphilones with lactone ring		Monapilosusazaphilone	M. pilosus	C23H32O5	388.2250	Chen W, Feng Y, Molnár I, Chen F. Nature and nurture: confluence of pathway determinism with metabolic and chemical serendipity diversifies Monascus azaphilone pigments. Nat Prod Rep. 17 avr 2019;36(4):561‑72.
Azaphilones with lactone ring		monascusazaphilol	Monascus pilosus BCRC 38072	C25H36O5	416.2563	Gao, J.-M., Yang, S.-X., & Qin, J.-C. (2013). Azaphilones: Chemistry and Biology. Chemical Reviews, 113(7), 4755–4811. doi:10.1021/cr300402y
Azaphilones with lactone ring		Monascusazaphilone C	Monascus purpureus BCRC 38108	C23H28O7	416.1835	Wu, M.-D., Cheng, M.-J., Yech, Y.-J., Chen, Y.-L., Chen, K.-P., Yang, P.-H., … Yuan, G.-F. (2013). Monascusazaphilones A–C, three new azaphilone analogues isolated from the fungusMonascus purpureusBCRC 38108. Natural Product Research, 27(13), 1145–1152. doi:10.1080/14786419.2012.715289
Azaphilones with lactone ring		Monascuskaodione	M. kaoliang	C24H30O5	398.2093	Chen W, Feng Y, Molnár I, Chen F. Nature and nurture: confluence of pathway determinism with metabolic and chemical serendipity diversifies Monascus azaphilone pigments. Nat Prod Rep. 17 avr 2019;36(4):561‑72. Cheng, M.-J., Wu, M.-D., Chan, H.-Y., Cheng, Y.-C., Chen, J.-J., Chen, Y.-L., … Yuan, G.-F. (2015). New Metabolite from the Fungus Monascus kaoliang. Chemistry of Natural Compounds, 51(6), …
Azaphilones with lactone ring		4',5′-bis-epi-chaetoviridin A	Chaetomium globosum	C23H25ClO6	432.1340	Makrerougras, M.; Coffinier, R.; Oger, S.; Chevalier, A.; Sabot, C.; Franck, X. Total Synthesis and Structural Revision of Chaetoviridins A. Org. Lett. 2017, 19 (15), 4146–4149. https://doi.org/10.1021/acs.orglett.7b02053.
Azaphilones with lactone ring		Monascuspurone	M. ruber	C26H34O5	426.2406	Chen W, Feng Y, Molnár I, Chen F. Nature and nurture: confluence of pathway determinism with metabolic and chemical serendipity diversifies Monascus azaphilone pigments. Nat Prod Rep. 17 avr 2019;36(4):561‑72.
Azaphilones with lactone ring		Monasfluol A	M. purpureus IB1	C21H26O6	374.1729	B. Balakrishnan, C. C. Chen, T. M. Pan and H. J. Kwon, Tetrahedron Lett., 2014, 55, 1640–1643.
Azaphilones with lactone ring		Monasfluol B	Δmpp7 mutant of M. purpuresus	C23H30O6	402.2042	B. Balakrishnan, C. C. Chen, T. M. Pan and H. J. Kwon, Tetrahedron Lett., 2014, 55, 1640–1643.
Azaphilones with lactone ring		Monasphilol-methoxy A	M. aurantiacus AS3.4384	C22H26O6	386.1729	Chen W, Feng Y, Molnár I, Chen F. Nature and nurture: confluence of pathway determinism with metabolic and chemical serendipity diversifies Monascus azaphilone pigments. Nat Prod Rep. 17 avr 2019;36(4):561‑72.
Azaphilones with lactone ring		Monasphilol-methoxy B	M. aurantiacus AS3.4384	C24H30O6	414.2042	Chen W, Feng Y, Molnár I, Chen F. Nature and nurture: confluence of pathway determinism with metabolic and chemical serendipity diversifies Monascus azaphilone pigments. Nat Prod Rep. 17 avr 2019;36(4):561‑72.
Azaphilones with lactone ring		Peyronellone A	Peyronellaea glomerata	C18H22O6	334.1416	Li, T.-X., Liu, R.-H., Wang, X.-B., Luo, J., Luo, J.-G., Kong, L.-Y., & Yang, M.-H. (2018). Hypoxia-Protective Azaphilone Adducts from Peyronellaea glomerata. Journal of Natural Products, 81(5), 1148–1153. doi:10.1021/acs.jnatprod.7b00663
Azaphilones with lactone ring		Peyronellone B	Peyronellaea glomerata	C18H22O6	334.1416	Li, T.-X., Liu, R.-H., Wang, X.-B., Luo, J., Luo, J.-G., Kong, L.-Y., & Yang, M.-H. (2018). Hypoxia-Protective Azaphilone Adducts from Peyronellaea glomerata. Journal of Natural Products, 81(5), 1148–1153. doi:10.1021/acs.jnatprod.7b00663
Azaphilones with lactone ring		cyathusal A	Cyathus stercoreus (Basidiomycete)	C17H14O7	330.0740	Gao, J.-M., Yang, S.-X., & Qin, J.-C. (2013). Azaphilones: Chemistry and Biology. Chemical Reviews, 113(7), 4755–4811. doi:10.1021/cr300402y
Azaphilones with lactone ring		cyathusal B	Cyathus stercoreus	C17H14O8	346.0689	Gao, J.-M., Yang, S.-X., & Qin, J.-C. (2013). Azaphilones: Chemistry and Biology. Chemical Reviews, 113(7), 4755–4811. doi:10.1021/cr300402y
Azaphilones with lactone ring		cyathusal C	Cyathus stercoreus	C20H20O8	388.1158	Gao, J.-M., Yang, S.-X., & Qin, J.-C. (2013). Azaphilones: Chemistry and Biology. Chemical Reviews, 113(7), 4755–4811. doi:10.1021/cr300402y
Azaphilones with lactone ring		cyathuscavin A	Cyathus stercoreus	C17H14O8	346.0689	Gao, J.-M., Yang, S.-X., & Qin, J.-C. (2013). Azaphilones: Chemistry and Biology. Chemical Reviews, 113(7), 4755–4811. doi:10.1021/cr300402y
Azaphilones with lactone ring		cyathuscavin B	Cyathus stercoreus	C18H16O9	376.0794	Gao, J.-M., Yang, S.-X., & Qin, J.-C. (2013). Azaphilones: Chemistry and Biology. Chemical Reviews, 113(7), 4755–4811. doi:10.1021/cr300402y
Azaphilones with lactone ring		cyathuscavin C	Cyathus stercoreus	C17H14O9	362.0638	Gao, J.-M., Yang, S.-X., & Qin, J.-C. (2013). Azaphilones: Chemistry and Biology. Chemical Reviews, 113(7), 4755–4811. doi:10.1021/cr300402y
Azaphilones with lactone ring		pulvinatal	Cyathus stercoreus Nidularia pulvinata (Schw.) Fr.	C18H16O8	360.0845	Gao, J.-M., Yang, S.-X., & Qin, J.-C. (2013). Azaphilones: Chemistry and Biology. Chemical Reviews, 113(7), 4755–4811. doi:10.1021/cr300402y
Azaphilones with lactone ring		Purpureusone	M. purpureus BCRC 38038	C23H34O5	390.2406	Chen W, Feng Y, Molnár I, Chen F. Nature and nurture: confluence of pathway determinism with metabolic and chemical serendipity diversifies Monascus azaphilone pigments. Nat Prod Rep. 17 avr 2019;36(4):561‑72.
Azaphilones with lactone ring		rubropunctatin	Monascus purpureus (Eurotiaceae) Monascus pilosus Monascus purpureus CBS 285.34 Talaromyces minioluteus	C21H22O5	354.1467	Gao, J.-M., Yang, S.-X., & Qin, J.-C. (2013). Azaphilones: Chemistry and Biology. Chemical Reviews, 113(7), 4755–4811. doi:10.1021/cr300402y Stošić, S., Ristić, D., Gašić, K., Starović, M., Ljaljević Grbić, M., Vukojević, J., & Živković, S. (2019). Talaromyces minioluteus – new postharvest fungal pathogen in Serbia. Plant Disease. doi:10.1094/pdis-08-19-1806-re
Azaphilones with lactone ring		Monascusazaphilol	M. pilosus BCRC 38072	C25H36O5	416.2563	Chen W, Feng Y, Molnár I, Chen F. Nature and nurture: confluence of pathway determinism with metabolic and chemical serendipity diversifies Monascus azaphilone pigments. Nat Prod Rep. 17 avr 2019;36(4):561‑72.
Azaphilones with lactone ring		monascorubrin	Monascus purpureus Monascus pilosus Monascus purpureus CBS 285.34 Talaromyces minioluteus	C23H26O5	382.1780	Gao, J.-M., Yang, S.-X., & Qin, J.-C. (2013). Azaphilones: Chemistry and Biology. Chemical Reviews, 113(7), 4755–4811. doi:10.1021/cr300402y Stošić, S., Ristić, D., Gašić, K., Starović, M., Ljaljević Grbić, M., Vukojević, J., & Živković, S. (2019). Talaromyces minioluteus – new postharvest fungal pathogen in Serbia. Plant Disease. doi:10.1094/pdis-08-19-1806-re
Azaphilones with lactone ring		sequoiamonascin C	Aspergillus parasiticus RDWD1-2 (endophyte)	C23H30O7	418.1992	Gao, J.-M., Yang, S.-X., & Qin, J.-C. (2013). Azaphilones: Chemistry and Biology. Chemical Reviews, 113(7), 4755–4811. doi:10.1021/cr300402y
Azaphilones with lactone ring		monascin monascoflavin	Monascus purpureus BCRC 38113 Monascus kaoliang KB20M10.2 Monascus purpureus Monascus pilosus Monascus purpureus NTU 568 Monascus purpureus CBS 285.34	C21H26O5	358.1780	Gao, J.-M., Yang, S.-X., & Qin, J.-C. (2013). Azaphilones: Chemistry and Biology. Chemical Reviews, 113(7), 4755–4811. doi:10.1021/cr300402y Osmanova, Natalia & Schultze, Wulf & Ayoub, Nahla. (2010). Azaphilones: a Class of Fungal Metabolites with Diverse Biological Activities. Phytochemistry Reviews. 9. 315-342. 10.1007/s11101-010-9171-3.
Azaphilones with lactone ring		monapilol A	Monascus purpureus NTU 568	C23H28O5	384.1937	Gao, J.-M., Yang, S.-X., & Qin, J.-C. (2013). Azaphilones: Chemistry and Biology. Chemical Reviews, 113(7), 4755–4811. doi:10.1021/cr300402y
Azaphilones with lactone ring		monapilol B	Monascus purpureus NTU 568	C21H24O5	356.1624	Gao, J.-M., Yang, S.-X., & Qin, J.-C. (2013). Azaphilones: Chemistry and Biology. Chemical Reviews, 113(7), 4755–4811. doi:10.1021/cr300402y
Azaphilones with lactone ring		monapilol C	Monascus purpureus NTU 568	C26H32O6	440.2199	Gao, J.-M., Yang, S.-X., & Qin, J.-C. (2013). Azaphilones: Chemistry and Biology. Chemical Reviews, 113(7), 4755–4811. doi:10.1021/cr300402y
Azaphilones with lactone ring		monapilol D	Monascus purpureus NTU 568	C24H28O6	412.1886	Gao, J.-M., Yang, S.-X., & Qin, J.-C. (2013). Azaphilones: Chemistry and Biology. Chemical Reviews, 113(7), 4755–4811. doi:10.1021/cr300402y
Azaphilones with lactone ring		PP-Y ((10Z)-monascorubrin)	Penicillium sp. AZ	C23H26O5	382.1780	Gao, J.-M., Yang, S.-X., & Qin, J.-C. (2013). Azaphilones: Chemistry and Biology. Chemical Reviews, 113(7), 4755–4811. doi:10.1021/cr300402y
Azaphilones with lactone ring		Monascinol	Monascus pilosus BCRC 38093 (mutant strain)	C21H28O5	360.1937	Screening of Azaphilone Derivatives From Monascus pilosus-Fermented Rice (Red Yeast Rice) and Their Evaluation as Nonsteroidal Androgen Receptor Antagonists Ming-Der Wu et al.
Azaphilones with lactone ring		monascusone B	Monascus kaoliang KB20M10.2	C17H18O5	302.1154	Gao, J.-M., Yang, S.-X., & Qin, J.-C. (2013). Azaphilones: Chemistry and Biology. Chemical Reviews, 113(7), 4755–4811. doi:10.1021/cr300402y
Azaphilones with lactone ring		ankaflavin	Monascus anka Monascus purpureus BCRC 38113 Monascus purpureus Monascus pilosus Monascus purpureus NTU 568 Monascus purpureus CBS 285.34	C23H30O5	386.2093	Gao, J.-M., Yang, S.-X., & Qin, J.-C. (2013). Azaphilones: Chemistry and Biology. Chemical Reviews, 113(7), 4755–4811. doi:10.1021/cr300402y
Azaphilones with lactone ring		yellow II	Monascus sp.	C23H30O5	386.2093	Gao, J.-M., Yang, S.-X., & Qin, J.-C. (2013). Azaphilones: Chemistry and Biology. Chemical Reviews, 113(7), 4755–4811. doi:10.1021/cr300402y
Azaphilones with lactone ring		PP-O ((10Z)-12-carboxylmonascorubrin)	Penicillium sp. AZ	C23H24O7	412.1522	Gao, J.-M., Yang, S.-X., & Qin, J.-C. (2013). Azaphilones: Chemistry and Biology. Chemical Reviews, 113(7), 4755–4811. doi:10.1021/cr300402y
Azaphilones with lactone ring		monascuspiloin (dihydromonascin)	Monascus pilosus M93	C21H28O5	360.1937	Gao, J.-M., Yang, S.-X., & Qin, J.-C. (2013). Azaphilones: Chemistry and Biology. Chemical Reviews, 113(7), 4755–4811. doi:10.1021/cr300402y
Azaphilones with lactone ring		ochrephilone	Penicillium multicolor NRRL 2060 Penicillium sp. FO-4164 Penicillium multicolor FO-2338 Penicillium sclerotiorum X11853 Penicillium citreonigrum AF033418 unidentified fungus ZJ27 (seaweed, endophytic)	C23H26O5	382.1780	Gao, J.-M., Yang, S.-X., & Qin, J.-C. (2013). Azaphilones: Chemistry and Biology. Chemical Reviews, 113(7), 4755–4811. doi:10.1021/cr300402y
Azaphilones with lactone ring		isorotiorin	Penicillium multicolor FO-2338	C23H24O5	380.1624	Gao, J.-M., Yang, S.-X., & Qin, J.-C. (2013). Azaphilones: Chemistry and Biology. Chemical Reviews, 113(7), 4755–4811. doi:10.1021/cr300402y
Azaphilones with lactone ring		(−)-rotiorin	Chaetomium cupreum CC3003	C23H24O5	380.1624	Gao, J.-M., Yang, S.-X., & Qin, J.-C. (2013). Azaphilones: Chemistry and Biology. Chemical Reviews, 113(7), 4755–4811. doi:10.1021/cr300402y
Azaphilones with lactone ring		rotiorin	Penicillium sclerotiorum Van Beyma Penicillium multicolor NRRL 2060	C23H24O5	380.1624	Gao, J.-M., Yang, S.-X., & Qin, J.-C. (2013). Azaphilones: Chemistry and Biology. Chemical Reviews, 113(7), 4755–4811. doi:10.1021/cr300402y
Azaphilones with lactone ring		rotiorinol A	Chaetomium cupreum CC3003	C23H26O5	382.1780	Gao, J.-M., Yang, S.-X., & Qin, J.-C. (2013). Azaphilones: Chemistry and Biology. Chemical Reviews, 113(7), 4755–4811. doi:10.1021/cr300402y
Azaphilones with lactone ring		rotiorinol B	Chaetomium cupreum CC3003	C23H26O6	398.1729	Gao, J.-M., Yang, S.-X., & Qin, J.-C. (2013). Azaphilones: Chemistry and Biology. Chemical Reviews, 113(7), 4755–4811. doi:10.1021/cr300402y
Azaphilones with lactone ring		rotiorinol C	Chaetomium cupreum CC3003	C23H26O6	398.1729	Gao, J.-M., Yang, S.-X., & Qin, J.-C. (2013). Azaphilones: Chemistry and Biology. Chemical Reviews, 113(7), 4755–4811. doi:10.1021/cr300402y
Azaphilones with lactone ring	revised structure	trichoflectin	Trichopezizella nidulus A73-95	C17H14O5	298.0841	Pyser, J.B., Baker Dockrey, S.A., Benítez, A.R., Joyce, L.A., Wiscons, R.A., Smith, J.L., Narayan, A.R.H., (2019). Stereodivergent, Chemoenzymatic Synthesis of Azaphilone Natural Products. J. Am. Chem. Soc. 141, 18551–18559. https://doi.org/10.1021/jacs.9b09385
Azaphilones with lactone ring		9-hexanoyl-3-(2-hydroxypropyl)-6a-methyl-9,9a-dihydro-6H-furo [2,3-h]isochromene-6,8(6aH)-dione	Monascus purpureus IB1 Monascus purpureus HP14 (mutant)	C21H26O6	374.1729	Gao, J.-M., Yang, S.-X., & Qin, J.-C. (2013). Azaphilones: Chemistry and Biology. Chemical Reviews, 113(7), 4755–4811. doi:10.1021/cr300402y
Azaphilones with lactone ring		monasfluore A	Monascus AS3.4444 Monascus purpureus BCRC 38113	C21H24O5	356.1624	Gao, J.-M., Yang, S.-X., & Qin, J.-C. (2013). Azaphilones: Chemistry and Biology. Chemical Reviews, 113(7), 4755–4811. doi:10.1021/cr300402y
Azaphilones with lactone ring		monasfluore B	Monascus AS3.4444 Monascus purpureus BCRC 38113	C23H28O5	384.1937	Gao, J.-M., Yang, S.-X., & Qin, J.-C. (2013). Azaphilones: Chemistry and Biology. Chemical Reviews, 113(7), 4755–4811. doi:10.1021/cr300402y
Azaphilones with lactone ring		sassafrin A	Creosphaeria sassafras (Xylariaceae)	C27H32O7	468.2148	Gao, J.-M., Yang, S.-X., & Qin, J.-C. (2013). Azaphilones: Chemistry and Biology. Chemical Reviews, 113(7), 4755–4811. doi:10.1021/cr300402y
Azaphilones with lactone ring		sassafrin B	Creosphaeria sassafras	C26H30O7	454.1992	Gao, J.-M., Yang, S.-X., & Qin, J.-C. (2013). Azaphilones: Chemistry and Biology. Chemical Reviews, 113(7), 4755–4811. doi:10.1021/cr300402y
Azaphilones with lactone ring		sassafrin C	Creosphaeria sassafras	C27H30O7	466.1992	Gao, J.-M., Yang, S.-X., & Qin, J.-C. (2013). Azaphilones: Chemistry and Biology. Chemical Reviews, 113(7), 4755–4811. doi:10.1021/cr300402y
Azaphilones with lactone ring		monascuskaolin	Monascus kaoliang BCRC 31506	C27H36O7	472.2461	Gao, J.-M., Yang, S.-X., & Qin, J.-C. (2013). Azaphilones: Chemistry and Biology. Chemical Reviews, 113(7), 4755–4811. doi:10.1021/cr300402y
Azaphilones with lactone ring		biscogniazaphilone B	Biscogniauxia formosana BCRC 33718 (Xylariaceae) (endophyte)	C25H32O5	412.2250	Gao, J.-M., Yang, S.-X., & Qin, J.-C. (2013). Azaphilones: Chemistry and Biology. Chemical Reviews, 113(7), 4755–4811. doi:10.1021/cr300402y
Azaphilones with lactone ring		Unnamed	Red yeast rice produced by uncharacterize d Monascus spp.	C23H28O5	384.1937	Chen W, Feng Y, Molnár I, Chen F. Nature and nurture: confluence of pathway determinism with metabolic and chemical serendipity diversifies Monascus azaphilone pigments. Nat Prod Rep. 17 avr 2019;36(4):561‑72.
Azaphilones with lactone ring		Unnamed	Red yeast rice produced by uncharacterize d Monascus spp.	C21H24O5	356.1624	Chen W, Feng Y, Molnár I, Chen F. Nature and nurture: confluence of pathway determinism with metabolic and chemical serendipity diversifies Monascus azaphilone pigments. Nat Prod Rep. 17 avr 2019;36(4):561‑72.
Azaphilones with lactone ring		Unnamed	M. ruber M7	C23H32O6	404.2199	Chen W, Feng Y, Molnár I, Chen F. Nature and nurture: confluence of pathway determinism with metabolic and chemical serendipity diversifies Monascus azaphilone pigments. Nat Prod Rep. 17 avr 2019;36(4):561‑72.
Azaphilones with lactone ring		Unnamed	M. ruber M7	C21H28O6	376.1886	Chen W, Feng Y, Molnár I, Chen F. Nature and nurture: confluence of pathway determinism with metabolic and chemical serendipity diversifies Monascus azaphilone pigments. Nat Prod Rep. 17 avr 2019;36(4):561‑72.
Azaphilones with lactone ring		Unnamed	M. ruber M7	C23H28O5	384.1937	Chen W, Feng Y, Molnár I, Chen F. Nature and nurture: confluence of pathway determinism with metabolic and chemical serendipity diversifies Monascus azaphilone pigments. Nat Prod Rep. 17 avr 2019;36(4):561‑72.
Azaphilones with lactone ring		Unnamed	M. ruber M7	C21H24O5	356.1624	Chen W, Feng Y, Molnár I, Chen F. Nature and nurture: confluence of pathway determinism with metabolic and chemical serendipity diversifies Monascus azaphilone pigments. Nat Prod Rep. 17 avr 2019;36(4):561‑72.
Azaphilones with lactone ring		Unnamed	M. ruber M7	C23H28O6	400.1886	Chen W, Feng Y, Molnár I, Chen F. Nature and nurture: confluence of pathway determinism with metabolic and chemical serendipity diversifies Monascus azaphilone pigments. Nat Prod Rep. 17 avr 2019;36(4):561‑72.
Azaphilones with lactone ring		Unnamed	M. ruber M7	C21H24O6	372.1573	Chen W, Feng Y, Molnár I, Chen F. Nature and nurture: confluence of pathway determinism with metabolic and chemical serendipity diversifies Monascus azaphilone pigments. Nat Prod Rep. 17 avr 2019;36(4):561‑72.
Azaphilones with lactone ring		phomopsone B	Phomopsis sp. CGMCC No.5416	C18H18O6	330.11	Yang Z-J, Zhang Y-F, Wu K, Xu Y-X, Meng X-G, Jiang Z-T, et al. New azaphilones, phomopsones A-C with biological activities from an endophytic fungus Phomopsis sp. CGMCC No.5416. Fitoterapia. 25 mars 2020;104573.
Azaphilones with lactone ring		sassafrin E	Aspergillus neoglaber	C27H32O6	452.2199	Isbrandt, T., Frisvad, J.C., Madsen, A. et al. New azaphilones from Aspergillus neoglaber.AMB Expr 10, 145 (2020). https://doi.org/10.1186/s13568-020-01078-4
Azaphilones with lactone ring		sassafrin F	Aspergillus neoglaber	C27H34O6	454.2355	Isbrandt, T., Frisvad, J.C., Madsen, A. et al. New azaphilones from Aspergillus neoglaber.AMB Expr 10, 145 (2020). https://doi.org/10.1186/s13568-020-01078-4
Azaphilonoïd		dothideomycetone A	Dothideomycete sp	C25H40O7	452.2774	Senadeera, S. P. D., Wiyakrutta, S., Mahidol, C., Ruchirawat, S., & Kittakoop, P. (2012). A novel tricyclic polyketide and its biosynthetic precursor azaphilone derivatives from the endophytic fungus Dothideomycete sp. Organic & Biomolecular Chemistry, 10(35), 7220. doi:10.1039/c2ob25959a
Azaphilonoïd		Dothideomycetone B	Dothideomycete sp	C25H40O7	452.2774	Senadeera, S. P. D., Wiyakrutta, S., Mahidol, C., Ruchirawat, S., & Kittakoop, P. (2012). A novel tricyclic polyketide and its biosynthetic precursor azaphilone derivatives from the endophytic fungus Dothideomycete sp. Organic & Biomolecular Chemistry, 10(35), 7220. doi:10.1039/c2ob25959a
Azaphilonoïd		M7PKS-1	M. ruber M7	C13H16O5	252.09983	Chen W, Feng Y, Molnár I, Chen F. Nature and nurture: confluence of pathway determinism with metabolic and chemical serendipity diversifies Monascus azaphilone pigments. Nat Prod Rep. 17 avr 2019;36(4):561‑72.
Azaphilonoïd		MA-1 (monaspurpurone)	M. purpureus BCRC 38113	C13H14O5	250.0841	Chen W, Feng Y, Molnár I, Chen F. Nature and nurture: confluence of pathway determinism with metabolic and chemical serendipity diversifies Monascus azaphilone pigments. Nat Prod Rep. 17 avr 2019;36(4):561‑72.
Azaphilonoïd		MA-2	M. ruber M7 and ΔmppA mutant of M. purpureus	C13H12O5	248.0685	Chen W, Feng Y, Molnár I, Chen F. Nature and nurture: confluence of pathway determinism with metabolic and chemical serendipity diversifies Monascus azaphilone pigments. Nat Prod Rep. 17 avr 2019;36(4):561‑72.
Azaphilonoïd		MA-3	M. ruber M7 and ΔmppA mutant of M. purpureus	C13H12O4	232.0736	Chen W, Feng Y, Molnár I, Chen F. Nature and nurture: confluence of pathway determinism with metabolic and chemical serendipity diversifies Monascus azaphilone pigments. Nat Prod Rep. 17 avr 2019;36(4):561‑72.
Azaphilonoïd		MA-4	M. ruber M7 and ΔmppA mutant of M. purpureus	C13H10O5	246.0528	Chen W, Feng Y, Molnár I, Chen F. Nature and nurture: confluence of pathway determinism with metabolic and chemical serendipity diversifies Monascus azaphilone pigments. Nat Prod Rep. 17 avr 2019;36(4):561‑72.
Azaphilonoïd		Monapurpureusone	Monascus purpureus BCRC 38110	C15H22O5	282.1467	Wu, H.-C., Cheng, M.-J., Wu, M.-D., Chen, J.-J., Chen, Y.-L., Chang, H.-S., & Chen, K.-P. (2018). Secondary metabolites from the fermented rice of the fungus Monascus purpureus and their bioactivities. Natural Product Research, 1–10. doi:10.1080/14786419.2018.1488698
Azaphilonoïd		monapurpyridine A (MPA)	Monascus purpureus NTU 568	C24H33NO4	399.2411	Hsu, L.-C., Hsu, Y.-W., Liang, Y.-H., Liaw, C.-C., Kuo, Y.-H., & Pan, T.-M. (2012). Induction of Apoptosis in Human Breast Adenocarcinoma Cells MCF-7 by Monapurpyridine A, a New Azaphilone Derivative from Monascus purpureus NTU 568. Molecules, 17(1), 664–673. doi:10.3390/molecules17010664
Azaphilonoïd		Monaphilone C	M. purpureus NTU 568	C20H32O4	336.2301	Chen W, Feng Y, Molnár I, Chen F. Nature and nurture: confluence of pathway determinism with metabolic and chemical serendipity diversifies Monascus azaphilone pigments. Nat Prod Rep. 17 avr 2019;36(4):561‑72.
Azaphilonoïd		Unnamed	M. ruber M7	C13H14O5	250.08417	Chen W, Feng Y, Molnár I, Chen F. Nature and nurture: confluence of pathway determinism with metabolic and chemical serendipity diversifies Monascus azaphilone pigments. Nat Prod Rep. 17 avr 2019;36(4):561‑72.
Bicyclic azaphilones		citrinin (monascidin A)	Penicillium citrinum Penicillium sp. GQ-7 (endophyte) Penicillium sp. SBE-8 (mangrove endophyte) Penicillium citrinum B-57 (halotolerant) Penicillium notatum B-52 Penicillium citrinum IFM 53298 Monascus purpureus Monascus ruber Penicillium citrinum MST-F10130 Penicillium sp. MFA446 (marine fungus) Penicillium citrinum HGY1-5 (volcano-ash-derived fungus) Penicillium sp. H9318 Penicillium citrinum …	C13H14O5	250.0841	Gao, J.-M., Yang, S.-X., & Qin, J.-C. (2013). Azaphilones: Chemistry and Biology. Chemical Reviews, 113(7), 4755–4811. doi:10.1021/cr300402y
Bicyclic azaphilones		dihydrocitrinin	Penicillium sp. GQ-7 (endophyte) Penicillium citrinum MST-F10130 Penicillium citrinum B-57	C13H16O5	252.0998	Gao, J.-M., Yang, S.-X., & Qin, J.-C. (2013). Azaphilones: Chemistry and Biology. Chemical Reviews, 113(7), 4755–4811. doi:10.1021/cr300402y
Bicyclic azaphilones		decarboxydihydrocitrinin	Aspergillus sydowi YH11-2 Penicillium citrinum IFM 53298 Cylindrocarpon sp. SC 0537 Penicillium citrinum PSU-F51 Penicillium citrinum HGY1-5 (volcano-ash-derived fungus)	C12H16O3	208.1099	Gao, J.-M., Yang, S.-X., & Qin, J.-C. (2013). Azaphilones: Chemistry and Biology. Chemical Reviews, 113(7), 4755–4811. doi:10.1021/cr300402y
Bicyclic azaphilones		1-acetonyl-7-carboxyl-6,8-dihydroxy-3,4,5-trimethylisochroman	Cylindrocarpon sp. SC 0537 Penicillium citrinum PSU-F51	C16H20O6	308.1260	Gao, J.-M., Yang, S.-X., & Qin, J.-C. (2013). Azaphilones: Chemistry and Biology. Chemical Reviews, 113(7), 4755–4811. doi:10.1021/cr300402y
Bicyclic azaphilones		7-carboxyl-6,8-dihydroxy- 1,1,3,4,5-pentamethylisochroman	Cylindrocarpon sp. SC 0537	C15H20O5	280.1311	Gao, J.-M., Yang, S.-X., & Qin, J.-C. (2013). Azaphilones: Chemistry and Biology. Chemical Reviews, 113(7), 4755–4811. doi:10.1021/cr300402y
Bicyclic azaphilones		penicitrinol C	Penicillium citrinum	C15H20O4	264.1362	Gao, J.-M., Yang, S.-X., & Qin, J.-C. (2013). Azaphilones: Chemistry and Biology. Chemical Reviews, 113(7), 4755–4811. doi:10.1021/cr300402y
Bicyclic azaphilones		spiciferinone	Cochliobolus spicifer Nelson D-5 (Pyrenophoraceae)	C14H16O3	232.1099	Gao, J.-M., Yang, S.-X., & Qin, J.-C. (2013). Azaphilones: Chemistry and Biology. Chemical Reviews, 113(7), 4755–4811. doi:10.1021/cr300402y
Bicyclic azaphilones		8a-hydroxy-spiciferinone	co-culture of Plenodomus influorescens (strong) and Pyrenochaeta nobilis	C14H18O4	250.1205	Design of Fungal Co-Cultivation Based on Comparative Metabolomics and Bioactivity for Discovery of Marine Fungal Agrochemicals Ernest Oppong-Danquah et al.
Bicyclic azaphilones		leptosphaerone (pseudohalonectrin A, (7S,8R)-7-ethyl-7,8-dihydro- 8-hydroxy- 3,4,7-trimethyl-6H-[2]benzopyran-6-one)	Leptosphaeria sp. IV403 (endophyte) Pseudohalonectria adversaria YMF1.01019	C14H18O3	234.1256	Gao, J.-M., Yang, S.-X., & Qin, J.-C. (2013). Azaphilones: Chemistry and Biology. Chemical Reviews, 113(7), 4755–4811. doi:10.1021/cr300402y
Bicyclic azaphilones		fusarone	Fusarium sp. LN-12 (endophyte)	C15H24O5	284.1624	Gao, J.-M., Yang, S.-X., & Qin, J.-C. (2013). Azaphilones: Chemistry and Biology. Chemical Reviews, 113(7), 4755–4811. doi:10.1021/cr300402y
Bicyclic azaphilones		(3R,4S)-6,8-dihydroxy-1,1-dimethyl- 3,4,5-trimethylisochroman	Penicillium citrinum PSU-F51 (marine fungus)	C14H20O3	236.1412	Gao, J.-M., Yang, S.-X., & Qin, J.-C. (2013). Azaphilones: Chemistry and Biology. Chemical Reviews, 113(7), 4755–4811. doi:10.1021/cr300402y
Bicyclic azaphilones		felinone A	Beauveria felina EN-135	C11H16O4	212.1049	Du F-Y, Li X-M, Zhang P, Li C-S, Wang B-G. (2014). Cyclodepsipeptides and Other O-Containing Heterocyclic Metabolites from Beauveria felina EN-135, a Marine-Derived Entomopathogenic Fungus. Marine Drugs, 12(5), 2816-2826.
Bicyclic azaphilones		fusaraisochromenone	Fusarium sp. PDB51F5	C11H16O4	212.1049	Boonyaketgoson, S., Trisuwan, K., Bussaban, B., Rukachaisirikul, V., Phongpaichit, S., (2015). Isochromanone derivatives from the endophytic fungus Fusarium sp. PDB51F5. Tetrahedron Letters 56, 5076–5078. https://doi.org/10.1016/j.tetlet.2015.07.048
Bicyclic azaphilones		hypoillexidiol	Hypoxylon sp. 12F 0687	C11H16O4	212.1049	Abe, H., Tango, H., Kobayashi, T., Ito, H., (2017). Asymmetric total synthesis and revision of absolute configurations of azaphilone derivative felinone A. Tetrahedron Letters 58, 4296–4298. https://doi.org/10.1016/j.tetlet.2017.09.090
Bicyclic azaphilones		xylariphilone	Xylariales sp. PSU-ES163	C11H16O4	212.1049	Abe, H., Tango, H., Kobayashi, T., Ito, H., (2017). Asymmetric total synthesis and revision of absolute configurations of azaphilone derivative felinone A. Tetrahedron Letters 58, 4296–4298. https://doi.org/10.1016/j.tetlet.2017.09.090
Bicyclic azaphilones		aspergillusone C	Aspergillus clavatus	C11H16O4	212.1049	Wang, J., Bai, G., Liu, Y., Wang, H., Li, Y., Yin, W., … Lu, F. (2015). Cytotoxic Metabolites Produced by the Endophytic Fungus Aspergillus clavatus. Chemistry Letters, 44(8), 1148–1149. doi:10.1246/cl.150417
Bicyclic azaphilones		austdiol : ((7R,8S)-7,8-dihydroxy-3,7-dimethyl-6-oxo-7,8-dihydro- 6H-isochromene-5-carbaldehyde	Aspergillus ustus (Bainier)	C12H12O5	236.0685	Gao, J.-M., Yang, S.-X., & Qin, J.-C. (2013). Azaphilones: Chemistry and Biology. Chemical Reviews, 113(7), 4755–4811. doi:10.1021/cr300402y
Bicyclic azaphilones		dihydrodeoxy-8-epi-austdiol : ((7R,8R)-7,8-dihydro-7,8-dihydroxy- 3,5,7-trimethyl-2-benzopyran-6-one)	Aspergillus ustus (Bainier)	C12H14O4	222.0892	Gao, J.-M., Yang, S.-X., & Qin, J.-C. (2013). Azaphilones: Chemistry and Biology. Chemical Reviews, 113(7), 4755–4811. doi:10.1021/cr300402y
Bicyclic azaphilones		(3S)-4,6-dihydro-8-methoxy-3,5- dimethyl-6-oxo-3H-2-benzopyran	Penicillium expansum	C12H14O3	206.0943	Gao, J.-M., Yang, S.-X., & Qin, J.-C. (2013). Azaphilones: Chemistry and Biology. Chemical Reviews, 113(7), 4755–4811. doi:10.1021/cr300402y
Bicyclic azaphilones		arohynapene C ((3S)-6-hydroxy-8-methoxy-3,5- dimethylisochroman)	Penicillium expansum a hybrid strain ME 0004 derived from Penicillium citreo-viride B. IFO6200 and 4692 Penicillium sp. FO-2295	C12H16O3	208.1099	Gao, J.-M., Yang, S.-X., & Qin, J.-C. (2013). Azaphilones: Chemistry and Biology. Chemical Reviews, 113(7), 4755–4811. doi:10.1021/cr300402y
Bicyclic azaphilones		arohynapene D	Penicillium sp. FO-2295	C11H14O3	194.0943	Gao, J.-M., Yang, S.-X., & Qin, J.-C. (2013). Azaphilones: Chemistry and Biology. Chemical Reviews, 113(7), 4755–4811. doi:10.1021/cr300402y
Bicyclic azaphilones		8-hydroxy-6-methoxy-3,7-dimethylisochroman	Penicillium citrinum Penicillium steckii	C12H16O3	208.1099	Gao, J.-M., Yang, S.-X., & Qin, J.-C. (2013). Azaphilones: Chemistry and Biology. Chemical Reviews, 113(7), 4755–4811. doi:10.1021/cr300402y
Bicyclic azaphilones		6-hydroxy-3-methylisochroman-5-carboxylic acid	unidentified mangrove endophytic fungus no. 1893	C11H12O4	208.0736	Gao, J.-M., Yang, S.-X., & Qin, J.-C. (2013). Azaphilones: Chemistry and Biology. Chemical Reviews, 113(7), 4755–4811. doi:10.1021/cr300402y
Bicyclic azaphilones		penicisochroman D	Penicillium sp. PSU-F40 (marine fungus)	C10H12O2	164.0837	Gao, J.-M., Yang, S.-X., & Qin, J.-C. (2013). Azaphilones: Chemistry and Biology. Chemical Reviews, 113(7), 4755–4811. doi:10.1021/cr300402y
Bicyclic azaphilones		penicisochroman E	Penicillium sp. PSU-F40	C10H12O3	180.0786	Gao, J.-M., Yang, S.-X., & Qin, J.-C. (2013). Azaphilones: Chemistry and Biology. Chemical Reviews, 113(7), 4755–4811. doi:10.1021/cr300402y
Bicyclic azaphilones		(3S*,4S*,5S*,6R*)-4,5,6-trihydroxy-3-methyl- 3,4,6,7-tetrahydro- 1H-isochromen-8(5H)-one	Delitschia corticola YMF 1.01111 (aquatic fungus)	C10H14O5	214.0841	Gao, J.-M., Yang, S.-X., & Qin, J.-C. (2013). Azaphilones: Chemistry and Biology. Chemical Reviews, 113(7), 4755–4811. doi:10.1021/cr300402y
Bicyclic azaphilones		chlamyphilone	Pochonia chlamydosporia	C12H12O4	220.0736	Lacatena, F., Marra, R., Mazzei, P., Piccolo, A., Digilio, M., Giorgini, M., … Vinale, F. (2019). Chlamyphilone, a Novel Pochonia chlamydosporia Metabolite with Insecticidal Activity. Molecules, 24(4), 750. doi:10.3390/molecules24040750
Bicyclic azaphilones		pentaketide	Talaromyces stipitatus using Aspergillus oryzae heterologous expression	C11H12O3	192.0786	Hashimoto, M., Wakana, D., Ueda, M., Kobayashi, D., Goda, Y., & Fujii, I. (2015). Product identification of non-reducing polyketide synthases with C-terminus methyltransferase domain from Talaromyces stipitatus using Aspergillus oryzae heterologous expression. Bioorganic & Medicinal Chemistry Letters, 25(7), 1381–1384. doi:10.1016/j.bmcl.2015.02.057
Bicyclic azaphilones		Perangustol A	Cladosporium perangustm FS62	C11H14O4	210.0892	Fan, Z., Sun, Z.-H., Liu, H.-X., Chen, Y.-C., Li, H.-H., & Zhang, W.-M. (2016). Perangustols A and B, a pair of new azaphilone epimers from a marine sediment-derived fungusCladosporium perangustmFS62. Journal of Asian Natural Products Research, 18(11), 1024–1029. doi:10.1080/10286020.2016.1181623
Bicyclic azaphilones		Perangustols B	Cladosporium perangustm FS62	C11H14O4	210.0892	Fan, Z., Sun, Z.-H., Liu, H.-X., Chen, Y.-C., Li, H.-H., & Zhang, W.-M. (2016). Perangustols A and B, a pair of new azaphilone epimers from a marine sediment-derived fungusCladosporium perangustmFS62. Journal of Asian Natural Products Research, 18(11), 1024–1029. doi:10.1080/10286020.2016.1181623
Bicyclic azaphilones		Unnamed	Aspergillus fumigatus	C11H12O5	224.0685	Li, X.-H., Han, X.-H., Qin, L.-L., He, J.-L., Cao, Z.-X., Gu, Y.-C., … Deng, Y. (2018). Isochromanes from Aspergillus fumigatus, an endophytic fungus from Cordyceps sinensis. Natural Product Research, 1–6. doi:10.1080/14786419.2018.1478824
Bicyclic azaphilones		Unnamed	Aspergillus fumigatus	C11H14O4	210.0892	Li, X.-H., Han, X.-H., Qin, L.-L., He, J.-L., Cao, Z.-X., Gu, Y.-C., … Deng, Y. (2018). Isochromanes from Aspergillus fumigatus, an endophytic fungus from Cordyceps sinensis. Natural Product Research, 1–6. doi:10.1080/14786419.2018.1478824
Bicyclic azaphilones		Unnamed	Aspergillus fumigatus	C12H16O4	224.1049	Li, X.-H., Han, X.-H., Qin, L.-L., He, J.-L., Cao, Z.-X., Gu, Y.-C., … Deng, Y. (2018). Isochromanes from Aspergillus fumigatus, an endophytic fungus from Cordyceps sinensis. Natural Product Research, 1–6. doi:10.1080/14786419.2018.1478824
Bicyclic azaphilones		Unnamed	Aspergillus fumigatus	C14H20O5	268.1311	Li, X.-H., Han, X.-H., Qin, L.-L., He, J.-L., Cao, Z.-X., Gu, Y.-C., … Deng, Y. (2018). Isochromanes from Aspergillus fumigatus, an endophytic fungus from Cordyceps sinensis. Natural Product Research, 1–6. doi:10.1080/14786419.2018.1478824
Bicyclic azaphilones		Dothideomynone B	Dothideomycete sp.	C18H18O7	346.1053	One strain-many compounds (OSMAC) method for production of polyketides, azaphilones, and an isochromanone using the endophytic fungus Dothideomycete sp. Ranuka T. Hewage
Bicyclic azaphilones		Dothideomynone C	Dothideomycete sp.	C13H16O5	252.0998	One strain-many compounds (OSMAC) method for production of polyketides, azaphilones, and an isochromanone using the endophytic fungus Dothideomycete sp. Ranuka T. Hewage
Bicyclic azaphilones		xylariphilone	Annulohypoxylon truncatum	C11H16O5	228.0998	Li, W., Lee, C., Bang, S. H., Ma, J. Y., Kim, S., Koh, Y.-S., & Shim, S. H. (2016). Isochromans and Related Constituents from the Endophytic Fungus Annulohypoxylon truncatum of Zizania caduciflora and Their Anti-Inflammatory Effects. Journal of Natural Products, 80(1), 205–209. doi:10.1021/acs.jnatprod.6b00698
Bicyclic azaphilones		3,6,8-trihydroxy-3-methyl-3,4-dihydroisocoumarin	Didymella sp. IEA-3B.1,	C10H10O5	210.0528	Didymellanosine, a new decahydrofluorene analogue, and ascolactone C from Didymella sp. IEA-3B.1, an endophyte of Terminalia catappa† Ni P. Ariantari et al.
Bicyclic azaphilones		Dothideomynone A	Dothideomycete sp	C12H14O6	254.0790	Hewage, R. T., Aree, T., Mahidol, C., Ruchirawat, S., & Kittakoop, P. (2014). One strain-many compounds (OSMAC) method for production of polyketides, azaphilones, and an isochromanone using the endophytic fungus Dothideomycete sp. Phytochemistry, 108, 87–94. doi:10.1016/j.phytochem.2014.09.013
Bicyclic azaphilones		eupenicillin A	Eupenicillium sp. 6A-9	C11H12O5	224.0685	Gu, B.-B., wu, Y., Tang, J., Jiao, W., Li, L., Sun, F., … Lin, H.-W. (2018). Azaphilone and isocoumarin derivatives from the sponge-derived fungus Eupenicillium sp. 6A-9. Tetrahedron Letters, 59(36), 3345–3348. doi:10.1016/j.tetlet.2018.06.057
Bicyclic azaphilones with aliphatic side chain		pseudohalonectrin B	Pseudohalonectria adversaria YMF1.01019	C16H20O3	260.1412	Gao, J.-M., Yang, S.-X., & Qin, J.-C. (2013). Azaphilones: Chemistry and Biology. Chemical Reviews, 113(7), 4755–4811. doi:10.1021/cr300402y
Bicyclic azaphilones with aliphatic side chain		Orevactaene	Epicoccum nigrum WC47880	C34H44O10	612.2934	OREVACTAENE, 1 A NOVEL BINDING INHIBITOR OF HIV-1 REV PROTEIN TO REV RESPONSE ELEMENT (RRE) FROM EPICOCCUM NIGRUM WC47880 Yue-Zhong Shu
Bicyclic azaphilones with aliphatic side chain		bisbynin	Stachybotrys bisbyi (Srinivasan) Barron	C15H22O5	282.1467	Gao, J.-M., Yang, S.-X., & Qin, J.-C. (2013). Azaphilones: Chemistry and Biology. Chemical Reviews, 113(7), 4755–4811. doi:10.1021/cr300402y
Bicyclic azaphilones with aliphatic side chain		azanigerone A	Aspergillus niger ATCC 1015	C19H22O7	362.1366	Zabala, A. O., Xu, W., Chooi, Y.-H., & Tang, Y. (2012). Characterization of a Silent Azaphilone Gene Cluster from Aspergillus niger ATCC 1015 Reveals a Hydroxylation-Mediated Pyran-Ring Formation. Chemistry & Biology, 19(8), 1049–1059. doi:10.1016/j.chembiol.2012.07.004
Bicyclic azaphilones with aliphatic side chain		azanigerone C	Aspergillus niger ATCC 1015	C21H28O7	392.1835	Zabala, A. O., Xu, W., Chooi, Y.-H., & Tang, Y. (2012). Characterization of a Silent Azaphilone Gene Cluster from Aspergillus niger ATCC 1015 Reveals a Hydroxylation-Mediated Pyran-Ring Formation. Chemistry & Biology, 19(8), 1049–1059. doi:10.1016/j.chembiol.2012.07.004
Bicyclic azaphilones with aliphatic side chain		azanigerone E	Aspergillus niger ATCC 1015	C13H14O5	250.0841	Zabala, A. O., Xu, W., Chooi, Y.-H., & Tang, Y. (2012). Characterization of a Silent Azaphilone Gene Cluster from Aspergillus niger ATCC 1015 Reveals a Hydroxylation-Mediated Pyran-Ring Formation. Chemistry & Biology, 19(8), 1049–1059. doi:10.1016/j.chembiol.2012.07.004
Bicyclic azaphilones with aliphatic side chain		azanigerone F	Aspergillus niger ATCC 1015	C15H16O6	292.0947	Zabala, A. O., Xu, W., Chooi, Y.-H., & Tang, Y. (2012). Characterization of a Silent Azaphilone Gene Cluster from Aspergillus niger ATCC 1015 Reveals a Hydroxylation-Mediated Pyran-Ring Formation. Chemistry & Biology, 19(8), 1049–1059. doi:10.1016/j.chembiol.2012.07.004
Bicyclic azaphilones with aliphatic side chain		Berkchaetoazaphilone C	Pleurostomophora sp.	C24H36O5	404.2563	Stierle, A. A., Stierle, D. B., Girtsman, T., Mou, T. C., Antczak, C., & Djaballah, H. (2015). Azaphilones from an Acid Mine Extremophile Strain of a Pleurostomophora sp. Journal of Natural Products, 78(12), 2917–2923. doi:10.1021/acs.jnatprod.5b00519
Bicyclic azaphilones with aliphatic side chain		sequoiatone B (sporogen-PF)	Penicillium funiculosum NOY-237 Aspergillus parasiticus RDWD1-2 81 Penicillium sp. JP-1 (endophyte)	C22H30O5	374.2093	Gao, J.-M., Yang, S.-X., & Qin, J.-C. (2013). Azaphilones: Chemistry and Biology. Chemical Reviews, 113(7), 4755–4811. doi:10.1021/cr300402y
Bicyclic azaphilones with aliphatic side chain		sequoiatone C	Aspergillus parasiticus RDWD1-2	C22H30O5	374.2093	Gao, J.-M., Yang, S.-X., & Qin, J.-C. (2013). Azaphilones: Chemistry and Biology. Chemical Reviews, 113(7), 4755–4811. doi:10.1021/cr300402y
Bicyclic azaphilones with aliphatic side chain		sequoiatone D	Aspergillus parasiticus RDWD1-2	C22H30O6	390.2042	Gao, J.-M., Yang, S.-X., & Qin, J.-C. (2013). Azaphilones: Chemistry and Biology. Chemical Reviews, 113(7), 4755–4811. doi:10.1021/cr300402y
Bicyclic azaphilones with aliphatic side chain		sequoiatone E	Aspergillus parasiticus RDWD1-2	C22H30O6	390.2042	Gao, J.-M., Yang, S.-X., & Qin, J.-C. (2013). Azaphilones: Chemistry and Biology. Chemical Reviews, 113(7), 4755–4811. doi:10.1021/cr300402y
Bicyclic azaphilones with aliphatic side chain		sequoiatone F	Aspergillus parasiticus RDWD1-2	C22H32O5	376.2250	Gao, J.-M., Yang, S.-X., & Qin, J.-C. (2013). Azaphilones: Chemistry and Biology. Chemical Reviews, 113(7), 4755–4811. doi:10.1021/cr300402y
Bicyclic azaphilones with aliphatic side chain		chrysodin	Sepedonium chrysospermum	C19H18O5	326.1154	Gao, J.-M., Yang, S.-X., & Qin, J.-C. (2013). Azaphilones: Chemistry and Biology. Chemical Reviews, 113(7), 4755–4811. doi:10.1021/cr300402y
Bicyclic azaphilones with aliphatic side chain		patulodin	Penicillium urticae Penicillium solitum strain CT2108	C23H26O8	430.1628	Gao, J.-M., Yang, S.-X., & Qin, J.-C. (2013). Azaphilones: Chemistry and Biology. Chemical Reviews, 113(7), 4755–4811. doi:10.1021/cr300402y
Bicyclic azaphilones with aliphatic side chain		CT2108A	Penicillium solitum strain CT2108	C21H22O7	386.1366	Gao, J.-M., Yang, S.-X., & Qin, J.-C. (2013). Azaphilones: Chemistry and Biology. Chemical Reviews, 113(7), 4755–4811. doi:10.1021/cr300402y
Bicyclic azaphilones with aliphatic side chain		CT2108B	Penicillium solitum strain CT2108	C21H22O6	370.1416	Gao, J.-M., Yang, S.-X., & Qin, J.-C. (2013). Azaphilones: Chemistry and Biology. Chemical Reviews, 113(7), 4755–4811. doi:10.1021/cr300402y
Bicyclic azaphilones with aliphatic side chain		S-15183a	Zopfiella inermis SANK15 183	C25H36O5	416.2563	Gao, J.-M., Yang, S.-X., & Qin, J.-C. (2013). Azaphilones: Chemistry and Biology. Chemical Reviews, 113(7), 4755–4811. doi:10.1021/cr300402y
Bicyclic azaphilones with aliphatic side chain		S-15183b	Zopfiella inermis SANK15 183	C27H40O5	444.2876	Gao, J.-M., Yang, S.-X., & Qin, J.-C. (2013). Azaphilones: Chemistry and Biology. Chemical Reviews, 113(7), 4755–4811. doi:10.1021/cr300402y
Bicyclic azaphilones with aliphatic side chain		CJ-12,373	Penicillium sp. CL22557	C17H24O6	324.1573	Gao, J.-M., Yang, S.-X., & Qin, J.-C. (2013). Azaphilones: Chemistry and Biology. Chemical Reviews, 113(7), 4755–4811. doi:10.1021/cr300402y
Bicyclic azaphilones with aliphatic side chain		pseudoanguillosporin A	Pseudoanguillospora sp.6577 (endophyte)	C17H26O3	278.1882	Gao, J.-M., Yang, S.-X., & Qin, J.-C. (2013). Azaphilones: Chemistry and Biology. Chemical Reviews, 113(7), 4755–4811. doi:10.1021/cr300402y
Bicyclic azaphilones with aliphatic side chain		pseudoanguillosporin B	Pseudoanguillospora sp.6577 (endophyte)	C17H26O4	294.1831	Gao, J.-M., Yang, S.-X., & Qin, J.-C. (2013). Azaphilones: Chemistry and Biology. Chemical Reviews, 113(7), 4755–4811. doi:10.1021/cr300402y
Bicyclic azaphilones with aliphatic side chain		cohaerin B	Hypoxylon cohaerens	C26H30O7	454.1992	Gao, J.-M., Yang, S.-X., & Qin, J.-C. (2013). Azaphilones: Chemistry and Biology. Chemical Reviews, 113(7), 4755–4811. doi:10.1021/cr300402y
Bicyclic azaphilones with aliphatic side chain		cohaerin F	Annulohypoxylon cohaerens	C27H36O6	456.2512	Surup, F., Mohr, K. I., Jansen, R., & Stadler, M. (2013). Cohaerins G–K, azaphilone pigments from Annulohypoxylon cohaerens and absolute stereochemistry of cohaerins C–K. Phytochemistry, 95, 252–258. doi:10.1016/j.phytochem.2013.07.027
Bicyclic azaphilones with aliphatic side chain		longirostrerone B	Chaetomium longirostre	C31H42O6	510.2981	Gao, J.-M., Yang, S.-X., & Qin, J.-C. (2013). Azaphilones: Chemistry and Biology. Chemical Reviews, 113(7), 4755–4811. doi:10.1021/cr300402y
Bicyclic azaphilones with aliphatic side chain		Cohaerin I	Annulohypoxylon cohaerens	C27H38O6	458.2668	Surup, F., Mohr, K. I., Jansen, R., & Stadler, M. (2013). Cohaerins G–K, azaphilone pigments from Annulohypoxylon cohaerens and absolute stereochemistry of cohaerins C–K. Phytochemistry, 95, 252–258. doi:10.1016/j.phytochem.2013.07.027
Bicyclic azaphilones with aliphatic side chain		Compound 3	Nigrospora oryzae and Irpex lacteus in coculture	C15H20O4	264.1362	Wu, Y.-M., Zhou, Q.-Y., Yang, X.-Q., Luo, Y.-J., Qian, J.-J., Liu, S.-X., … Ding, Z.-T. (2019). Adjusting the Mode of Fermentation for the Coculture of Phytopathogenic Nigrospora oryzae and Irpex lacteus Induces Production of Antiphytopathogenic Metabolites and Squalenes and Eliminates Phytotoxins. Journal of Agricultural and Food Chemistry. doi:10.1021/acs.jafc.9b04209
Bicyclic azaphilones with aliphatic side chain		Coniellin D	Coniella fragariae	C21H26O5	358.1780	Yu, H., Sperlich, J., Mándi, A., Kurtán, T., Dai, H., Teusch, N., … Proksch, P. (2018). Azaphilone Derivatives from the Fungus Coniella fragariae Inhibit NF-κB Activation and Reduce Tumor Cell Migration. Journal of Natural Products. doi:10.1021/acs.jnatprod.8b00540
Bicyclic azaphilones with aliphatic side chain		Coniellin E	Coniella fragariae	C21H28O6	376.1886	Yu, H., Sperlich, J., Mándi, A., Kurtán, T., Dai, H., Teusch, N., … Proksch, P. (2018). Azaphilone Derivatives from the Fungus Coniella fragariae Inhibit NF-κB Activation and Reduce Tumor Cell Migration. Journal of Natural Products. doi:10.1021/acs.jnatprod.8b00540
Bicyclic azaphilones with aliphatic side chain		Coniellin F	Coniella fragariae	C21H28O6	376.1886	Yu, H., Sperlich, J., Mándi, A., Kurtán, T., Dai, H., Teusch, N., … Proksch, P. (2018). Azaphilone Derivatives from the Fungus Coniella fragariae Inhibit NF-κB Activation and Reduce Tumor Cell Migration. Journal of Natural Products. doi:10.1021/acs.jnatprod.8b00540
Bicyclic azaphilones with aliphatic side chain		Coniellin G	Coniella fragariae	C22H30O6	390.2042	Yu, H., Sperlich, J., Mándi, A., Kurtán, T., Dai, H., Teusch, N., … Proksch, P. (2018). Azaphilone Derivatives from the Fungus Coniella fragariae Inhibit NF-κB Activation and Reduce Tumor Cell Migration. Journal of Natural Products. doi:10.1021/acs.jnatprod.8b00540
Bicyclic azaphilones with aliphatic side chain		Dechloroisochromophilone II	Penicillium multicolor CM01	C22H28O4	356.1988	Hemtasin, C., Kanokmedhakul, S., Moosophon, P., Soytong, K., & Kanokmedhakul, K. (2016). Bioactive azaphilones from the fungus Penicillium multicolor CM01. Phytochemistry Letters, 16, 56–60. doi:10.1016/j.phytol.2016.03.004
Bicyclic azaphilones with aliphatic side chain		Dothideomynone B	Dothideomycete sp	C18H18O7	346.1053	Hewage, R. T., Aree, T., Mahidol, C., Ruchirawat, S., & Kittakoop, P. (2014). One strain-many compounds (OSMAC) method for production of polyketides, azaphilones, and an isochromanone using the endophytic fungus Dothideomycete sp. Phytochemistry, 108, 87–94. doi:10.1016/j.phytochem.2014.09.013
Bicyclic azaphilones with aliphatic side chain		Dothideomynone C	Dothideomycete sp	C13H16O5	252.0998	Hewage, R. T., Aree, T., Mahidol, C., Ruchirawat, S., & Kittakoop, P. (2014). One strain-many compounds (OSMAC) method for production of polyketides, azaphilones, and an isochromanone using the endophytic fungus Dothideomycete sp. Phytochemistry, 108, 87–94. doi:10.1016/j.phytochem.2014.09.013
Bicyclic azaphilones with aliphatic side chain		Dothideomynone D	Dothideomycete sp	C18H24O6	336.1573	Wijesekera, K., Mahidol, C., Ruchirawat, S., & Kittakoop, P. (2017). Metabolite diversification by cultivation of the endophytic fungus Dothideomycete sp. in halogen containing media: Cultivation of terrestrial fungus in seawater. Bioorganic & Medicinal Chemistry, 25(11), 2868–2877. doi:10.1016/j.bmc.2017.03.040
Bicyclic azaphilones with aliphatic side chain		Dothideomynone E	Dothideomycete sp	C20H24O6	360.1573	Wijesekera, K., Mahidol, C., Ruchirawat, S., & Kittakoop, P. (2017). Metabolite diversification by cultivation of the endophytic fungus Dothideomycete sp. in halogen containing media: Cultivation of terrestrial fungus in seawater. Bioorganic & Medicinal Chemistry, 25(11), 2868–2877. doi:10.1016/j.bmc.2017.03.040
Bicyclic azaphilones with aliphatic side chain		Dothideomynone F	Dothideomycete sp	C20H24O6	360.1573	Wijesekera, K., Mahidol, C., Ruchirawat, S., & Kittakoop, P. (2017). Metabolite diversification by cultivation of the endophytic fungus Dothideomycete sp. in halogen containing media: Cultivation of terrestrial fungus in seawater. Bioorganic & Medicinal Chemistry, 25(11), 2868–2877. doi:10.1016/j.bmc.2017.03.040
Bicyclic azaphilones with aliphatic side chain		geumsanol A	Penicillium sp. KCB11A109	C19H26O6	350.1729	Son, S., Ko, S.-K., Kim, J. W., Lee, J. K., Jang, M., Ryoo, I.-J., … Ahn, J. S. (2016). Structures and biological activities of azaphilones produced by Penicillium sp. KCB11A109 from a ginseng field. Phytochemistry, 122, 154–164. doi:10.1016/j.phytochem.2015.12.008
Bicyclic azaphilones with aliphatic side chain		geumsanol C	Penicillium sp. KCB11A109	C19H28O6	352.1886	Son, S., Ko, S.-K., Kim, J. W., Lee, J. K., Jang, M., Ryoo, I.-J., … Ahn, J. S. (2016). Structures and biological activities of azaphilones produced by Penicillium sp. KCB11A109 from a ginseng field. Phytochemistry, 122, 154–164. doi:10.1016/j.phytochem.2015.12.008
Bicyclic azaphilones with aliphatic side chain		geumsanol D	Penicillium sp. KCB11A109	C21H30O7	394.1992	Son, S., Ko, S.-K., Kim, J. W., Lee, J. K., Jang, M., Ryoo, I.-J., … Ahn, J. S. (2016). Structures and biological activities of azaphilones produced by Penicillium sp. KCB11A109 from a ginseng field. Phytochemistry, 122, 154–164. doi:10.1016/j.phytochem.2015.12.008
Bicyclic azaphilones with aliphatic side chain		geumsanol E	Penicillium sp. KCB11A109	C21H28O5	360.1937	Son, S., Ko, S.-K., Kim, J. W., Lee, J. K., Jang, M., Ryoo, I.-J., … Ahn, J. S. (2016). Structures and biological activities of azaphilones produced by Penicillium sp. KCB11A109 from a ginseng field. Phytochemistry, 122, 154–164. doi:10.1016/j.phytochem.2015.12.008
Bicyclic azaphilones with aliphatic side chain	revised structure	helotialin A	Helotialean (Ascomycete)	C23H30O6	402.2042	Stierle, A.A., Stierle, D.B., Girtsman, T., Mou, T.C., Antczak, C., Djaballah, H., (2015). Azaphilones from an Acid Mine Extremophile Strain of a Pleurostomophora sp. J. Nat. Prod. 78, 2917–2923. https://doi.org/10.1021/acs.jnatprod.5b00519
Bicyclic azaphilones with aliphatic side chain		helotialin B	Helotialean sp. (Ascomycete)	C22H30O4	358.2144	Gao, J.-M., Yang, S.-X., & Qin, J.-C. (2013). Azaphilones: Chemistry and Biology. Chemical Reviews, 113(7), 4755–4811. doi:10.1021/cr300402y
Bicyclic azaphilones with aliphatic side chain		helotialin C	Helotialean sp. (Ascomycete)	C23H32O6	404.2199	Gao, J.-M., Yang, S.-X., & Qin, J.-C. (2013). Azaphilones: Chemistry and Biology. Chemical Reviews, 113(7), 4755–4811. doi:10.1021/cr300402y
Bicyclic azaphilones with aliphatic side chain		chermesinone A	Penicillium chermesinum ZH4-E2	C17H22O4	290.1518	Gao, J.-M., Yang, S.-X., & Qin, J.-C. (2013). Azaphilones: Chemistry and Biology. Chemical Reviews, 113(7), 4755–4811. doi:10.1021/cr300402y
Bicyclic azaphilones with aliphatic side chain		Isonigirpexin C	Coculture of Nigrospora oryzae and Irpex lacteus	C15H20O4	264.1362	Wu, Y. M., Zhou, Q. Y., Yang, X. Q., Luo, Y. J., Qian, J. J., Liu, S. X., Yang, Y. B., & Ding, Z. T. (2019). Induction of Antiphytopathogenic Metabolite and Squalene Production and Phytotoxin Elimination by Adjustment of the Mode of Fermentation in Cocultures of Phytopathogenic Nigrospora oryzae and Irpex lacteus. Journal of agricultural and food chemistry, 67(43), 11877–11882. https://doi.org/10…
Bicyclic azaphilones with aliphatic side chain		Monascusazaphilone B	Monascus purpureus BCRC 38108	C22H30O4	358.2144	Wu, M.-D., Cheng, M.-J., Yech, Y.-J., Chen, Y.-L., Chen, K.-P., Yang, P.-H., … Yuan, G.-F. (2013). Monascusazaphilones A–C, three new azaphilone analogues isolated from the fungusMonascus purpureusBCRC 38108. Natural Product Research, 27(13), 1145–1152. doi:10.1080/14786419.2012.715289
Bicyclic azaphilones with aliphatic side chain		monascusone A	Monascus kaoliang KB20M10.2	C13H18O5	254.1154	Gao, J.-M., Yang, S.-X., & Qin, J.-C. (2013). Azaphilones: Chemistry and Biology. Chemical Reviews, 113(7), 4755–4811. doi:10.1021/cr300402y
Bicyclic azaphilones with aliphatic side chain		FK17-P2b1	Aspergillus sp. FK17	C13H16O4	236.1049	Gao, J.-M., Yang, S.-X., & Qin, J.-C. (2013). Azaphilones: Chemistry and Biology. Chemical Reviews, 113(7), 4755–4811. doi:10.1021/cr300402y
Bicyclic azaphilones with aliphatic side chain		FK17-P2b2	Aspergillus sp. FK17 Monascus kaoliang KB20M10.2	C13H16O4	236.1049	Gao, J.-M., Yang, S.-X., & Qin, J.-C. (2013). Azaphilones: Chemistry and Biology. Chemical Reviews, 113(7), 4755–4811. doi:10.1021/cr300402y
Bicyclic azaphilones with aliphatic side chain		berkazaphilone A	Penicillium rubrum Stoll	C13H16O3	220.1099	Gao, J.-M., Yang, S.-X., & Qin, J.-C. (2013). Azaphilones: Chemistry and Biology. Chemical Reviews, 113(7), 4755–4811. doi:10.1021/cr300402y
Bicyclic azaphilones with aliphatic side chain		rubiginosin C	Hypoxylon rubiginosum	C28H38O6	470.2668	Gao, J.-M., Yang, S.-X., & Qin, J.-C. (2013). Azaphilones: Chemistry and Biology. Chemical Reviews, 113(7), 4755–4811. doi:10.1021/cr300402y
Bicyclic azaphilones with aliphatic side chain		Lunatoic acid B	C. lunatus IFO 5997 P. multicolor FO-2338	C21H26O7	390.1679	Natsume, M., Takahashi, Y., & Marumo, S. (1988). Chlamydospore-like Cell-inducing Substances of Fungi: Close Correlation between Chemical Reactivity with Methylamine and Biological Activity, Agricultural and Biological Chemistry, 52:2, 307-312, DOI: 10.1080/00021369.1988.10868682 Nukina, M., & Marumo, S. (1977). Radicinol, a new metabolite of cochliobolus lunata, and absolute stereochemistry of r…
Bicyclic azaphilones with aliphatic side chain		Lunatoic acid A	Cochliobolus lunata IFO 5997 P. multicolor FO-2338	C21H24O7	388.1522	Marumo, S., Nukina, M., Kondo, S., & Tomiyama, K. (1982) Lunatoic Acid A, a Morphogenic Substance Inducing Chlamydospore-like Cells in Some Fungi, Agricultural and Biological Chemistry, 46:9, 2399-2401, DOI: 10.1080/00021369.1982.10865448 Natsume, M., Takahashi, Y., & Marumo, S. (1988). Chlamydospore-like Cell-inducing Substances of Fungi: Close Correlation between Chemical Reactivity with Methyl…
Bicyclic azaphilones with aliphatic side chain		ascochitine	Ascochyta salicorniae	C15H16O5	276.0998	Gao, J.-M., Yang, S.-X., & Qin, J.-C. (2013). Azaphilones: Chemistry and Biology. Chemical Reviews, 113(7), 4755–4811. doi:10.1021/cr300402y
Bicyclic azaphilones with aliphatic side chain		nigbeauvin A	Nigrospora oryzae co-cultured with Beauveria bassiana	C15H18O4	262.1205	Zhang, Z.-X., Yang, X.-Q., Zhou, Q.-Y., Wang, B.-Y., Hu, M., Yang, Y.-B., … Ding, Z.-T. (2018). New Azaphilones from Nigrospora oryzae Co-Cultured with Beauveria bassiana. Molecules, 23(7), 1816. doi:10.3390/molecules23071816
Bicyclic azaphilones with aliphatic side chain		nigbeauvin C	Nigrospora oryzae co-cultured with Beauveria bassiana	C15H20O6	296.1260	Zhang, Z.-X., Yang, X.-Q., Zhou, Q.-Y., Wang, B.-Y., Hu, M., Yang, Y.-B., … Ding, Z.-T. (2018). New Azaphilones from Nigrospora oryzae Co-Cultured with Beauveria bassiana. Molecules, 23(7), 1816. doi:10.3390/molecules23071816
Bicyclic azaphilones with aliphatic side chain		nigbeauvin D	Nigrospora oryzae co-cultured with Beauveria bassiana	C15H18O5	278.1154	Zhang, Z.-X., Yang, X.-Q., Zhou, Q.-Y., Wang, B.-Y., Hu, M., Yang, Y.-B., … Ding, Z.-T. (2018). New Azaphilones from Nigrospora oryzae Co-Cultured with Beauveria bassiana. Molecules, 23(7), 1816. doi:10.3390/molecules23071816
Bicyclic azaphilones with aliphatic side chain		nigbeauvin E	Nigrospora oryzae co-cultured with Beauveria bassiana	C15H20O6	296.1260	Zhang, Z.-X., Yang, X.-Q., Zhou, Q.-Y., Wang, B.-Y., Hu, M., Yang, Y.-B., … Ding, Z.-T. (2018). New Azaphilones from Nigrospora oryzae Co-Cultured with Beauveria bassiana. Molecules, 23(7), 1816. doi:10.3390/molecules23071816
Bicyclic azaphilones with aliphatic side chain		nigirpexin A	Nigrospora oryzae cocultured with Irpex lacteus	C15H16O3	244.1099	Zhou, Q.-Y., Yang, X.-Q., Zhang, Z.-X., Wang, B.-Y., Hu, M., Yang, Y.-B., … Ding, Z.-T. (2018). New azaphilones and tremulane sesquiterpene from endophytic Nigrospora oryzae cocultured with Irpex lacteus. Fitoterapia, 130, 26–30. doi:10.1016/j.fitote.2018.07.018
Bicyclic azaphilones with aliphatic side chain		nigirpexin B	Nigrospora oryzae cocultured with Irpex lacteus	C15H18O2	230.1307	Zhou, Q.-Y., Yang, X.-Q., Zhang, Z.-X., Wang, B.-Y., Hu, M., Yang, Y.-B., … Ding, Z.-T. (2018). New azaphilones and tremulane sesquiterpene from endophytic Nigrospora oryzae cocultured with Irpex lacteus. Fitoterapia, 130, 26–30. doi:10.1016/j.fitote.2018.07.018
Bicyclic azaphilones with aliphatic side chain		nigirpexin C	Nigrospora oryzae cocultured with Irpex lacteus	C15H20O4	264.1362	Zhou, Q.-Y., Yang, X.-Q., Zhang, Z.-X., Wang, B.-Y., Hu, M., Yang, Y.-B., … Ding, Z.-T. (2018). New azaphilones and tremulane sesquiterpene from endophytic Nigrospora oryzae cocultured with Irpex lacteus. Fitoterapia, 130, 26–30. doi:10.1016/j.fitote.2018.07.018
Bicyclic azaphilones with aliphatic side chain		nigirpexin D	Nigrospora oryzae cocultured with Irpex lacteus	C15H20O6	296.1260	Zhou, Q.-Y., Yang, X.-Q., Zhang, Z.-X., Wang, B.-Y., Hu, M., Yang, Y.-B., … Ding, Z.-T. (2018). New azaphilones and tremulane sesquiterpene from endophytic Nigrospora oryzae cocultured with Irpex lacteus. Fitoterapia, 130, 26–30. doi:10.1016/j.fitote.2018.07.018
Bicyclic azaphilones with aliphatic side chain		Penicilone A	Penicillium janthinellum HK1‑6	C29H36O7	496.2461	Chen, M., Shen, N.-X., Chen, Z.-Q., Zhang, F.-M., & Chen, Y. (2017). Penicilones A–D, Anti-MRSA Azaphilones from the Marine-Derived Fungus Penicillium janthinellum HK1-6. Journal of Natural Products, 80(4), 1081–1086. doi:10.1021/acs.jnatprod.6b01179
Bicyclic azaphilones with aliphatic side chain		peyronellone C	Peyronellaea glomerata	C15H18O5	278.1154	Li, T.-X., Liu, R.-H., Wang, X.-B., Luo, J., Luo, J.-G., Kong, L.-Y., & Yang, M.-H. (2018). Hypoxia-Protective Azaphilone Adducts from Peyronellaea glomerata. Journal of Natural Products, 81(5), 1148–1153. doi:10.1021/acs.jnatprod.7b00663
Bicyclic azaphilones with aliphatic side chain		Peyronellone D	Peyronellaea glomerata	C15H18O5	278.1154	Li, T.-X., Liu, R.-H., Wang, X.-B., Luo, J., Luo, J.-G., Kong, L.-Y., & Yang, M.-H. (2018). Hypoxia-Protective Azaphilone Adducts from Peyronellaea glomerata. Journal of Natural Products, 81(5), 1148–1153. doi:10.1021/acs.jnatprod.7b00663
Bicyclic azaphilones with aliphatic side chain		peyronellone F	Peyronellaea glomerata	C14H20O4	252.1362	Li, T.-X., Liu, R.-H., Wang, X.-B., Luo, J., Luo, J.-G., Kong, L.-Y., & Yang, M.-H. (2018). Hypoxia-Protective Azaphilone Adducts from Peyronellaea glomerata. Journal of Natural Products, 81(5), 1148–1153. doi:10.1021/acs.jnatprod.7b00663
Bicyclic azaphilones with aliphatic side chain		Peyronellones E	Peyronellaea glomerata	C15H18O5	278.1154	Li, T.-X., Liu, R.-H., Wang, X.-B., Luo, J., Luo, J.-G., Kong, L.-Y., & Yang, M.-H. (2018). Hypoxia-Protective Azaphilone Adducts from Peyronellaea glomerata. Journal of Natural Products, 81(5), 1148–1153. doi:10.1021/acs.jnatprod.7b00663
Bicyclic azaphilones with aliphatic side chain		Phialomustin A	Phialophora mustea	C24H28O5	396.1937	Nalli, Y., Mirza, D. N., Wani, Z. A., Wadhwa, B., Mallik, F. A., Raina, C., … Ali, A. (2015). Phialomustin A–D, new antimicrobial and cytotoxic metabolites from an endophytic fungus, Phialophora mustea. RSC Advances, 5(115), 95307–95312. doi:10.1039/c5ra18121f
Bicyclic azaphilones with aliphatic side chain		Phialomustin C	Phialophora mustea	C25H28O7	440.1835	Nalli, Y., Mirza, D. N., Wani, Z. A., Wadhwa, B., Mallik, F. A., Raina, C., … Ali, A. (2015). Phialomustin A–D, new antimicrobial and cytotoxic metabolites from an endophytic fungus, Phialophora mustea. RSC Advances, 5(115), 95307–95312. doi:10.1039/c5ra18121f
Bicyclic azaphilones with aliphatic side chain		lunatoic acid D	Paraphaeosphaeria sp. XZD2-1	C21H26O8	406.1628	New azaphilone, isocoumarin and α-pyrone derivatives from the marine-derived gut fungus Paraphaeosphaeria sp. XZD2-1 Author links open overlay panelJiaoluSun et al.
Bicyclic azaphilones with aliphatic side chain		Lunatoic acid E	Paraphaeosphaeria sp. XZD2-1	C21H28O7	392.1835	New azaphilone, isocoumarin and α-pyrone derivatives from the marine-derived gut fungus Paraphaeosphaeria sp. XZD2-1 Author links open overlay panelJiaoluSun et al.
Bicyclic azaphilones with aliphatic side chain		pulvilloric acid	Penicillium pulvillorum Penicillium araracuarense Penicillium elleniae Penicillium penarojense Penicillium vanderhammenii Penicillium wotroi	C15H18O5	278.1154	Gao, J.-M., Yang, S.-X., & Qin, J.-C. (2013). Azaphilones: Chemistry and Biology. Chemical Reviews, 113(7), 4755–4811. doi:10.1021/cr300402y
Bicyclic azaphilones with aliphatic side chain		phomoeuphorbin A	Phomopsis euphorbiae	C15H16O6	292.0947	Gao, J.-M., Yang, S.-X., & Qin, J.-C. (2013). Azaphilones: Chemistry and Biology. Chemical Reviews, 113(7), 4755–4811. doi:10.1021/cr300402y
Bicyclic azaphilones with aliphatic side chain		phomoeuphorbin B	Phomopsis euphorbiae	C15H18O4	262.1205	Gao, J.-M., Yang, S.-X., & Qin, J.-C. (2013). Azaphilones: Chemistry and Biology. Chemical Reviews, 113(7), 4755–4811. doi:10.1021/cr300402y
Bicyclic azaphilones with aliphatic side chain		phomoeuphorbin C	Phomopsis euphorbiae	C15H20O6	296.1260	Gao, J.-M., Yang, S.-X., & Qin, J.-C. (2013). Azaphilones: Chemistry and Biology. Chemical Reviews, 113(7), 4755–4811. doi:10.1021/cr300402y
Bicyclic azaphilones with aliphatic side chain		phomoeuphorbin D	Phomopsis euphorbiae	C15H20O6	296.1260	Gao, J.-M., Yang, S.-X., & Qin, J.-C. (2013). Azaphilones: Chemistry and Biology. Chemical Reviews, 113(7), 4755–4811. doi:10.1021/cr300402y
Bicyclic azaphilones with aliphatic side chain		T22 azaphilone	Trichoderma harzianum T22 and T39	C19H20O6	344.1260	Gao, J.-M., Yang, S.-X., & Qin, J.-C. (2013). Azaphilones: Chemistry and Biology. Chemical Reviews, 113(7), 4755–4811. doi:10.1021/cr300402y
Bicyclic azaphilones with aliphatic side chain		harziphilone	Trichoderma harzianum WC47695	C15H18O4	262.1205	Gao, J.-M., Yang, S.-X., & Qin, J.-C. (2013). Azaphilones: Chemistry and Biology. Chemical Reviews, 113(7), 4755–4811. doi:10.1021/cr300402y
Bicyclic azaphilones with aliphatic side chain		monaphilone A	Monascus purpureus NTU 568	C22H32O4	360.2301	Gao, J.-M., Yang, S.-X., & Qin, J.-C. (2013). Azaphilones: Chemistry and Biology. Chemical Reviews, 113(7), 4755–4811. doi:10.1021/cr300402y
Bicyclic azaphilones with aliphatic side chain		monaphilone B	Monascus purpureus NTU 568	C20H28O4	332.1988	Gao, J.-M., Yang, S.-X., & Qin, J.-C. (2013). Azaphilones: Chemistry and Biology. Chemical Reviews, 113(7), 4755–4811. doi:10.1021/cr300402y
Bicyclic azaphilones with aliphatic side chain		monapurone A	Monascus purpureus	C20H26O4	330.1831	Gao, J.-M., Yang, S.-X., & Qin, J.-C. (2013). Azaphilones: Chemistry and Biology. Chemical Reviews, 113(7), 4755–4811. doi:10.1021/cr300402y
Bicyclic azaphilones with aliphatic side chain		monarubrin	Monascus ruber ATCC 96218	C20H26O4	330.1831	Gao, J.-M., Yang, S.-X., & Qin, J.-C. (2013). Azaphilones: Chemistry and Biology. Chemical Reviews, 113(7), 4755–4811. doi:10.1021/cr300402y
Bicyclic azaphilones with aliphatic side chain		rubropunctin	Monascus ruber ATCC 96218	C22H30O4	358.2144	Gao, J.-M., Yang, S.-X., & Qin, J.-C. (2013). Azaphilones: Chemistry and Biology. Chemical Reviews, 113(7), 4755–4811. doi:10.1021/cr300402y
Bicyclic azaphilones with aliphatic side chain		biscogniazaphilone A	Biscogniauxia formosana BCRC 33718 (Xylariaceae) (endophytic)	C24H34O4	386.2457	Gao, J.-M., Yang, S.-X., & Qin, J.-C. (2013). Azaphilones: Chemistry and Biology. Chemical Reviews, 113(7), 4755–4811. doi:10.1021/cr300402y
Bicyclic azaphilones with aliphatic side chain		penicilazaphilone A	Penicillium sclerotiorum PSU-A13 (endophytic)	C22H32O6	392.2199	Gao, J.-M., Yang, S.-X., & Qin, J.-C. (2013). Azaphilones: Chemistry and Biology. Chemical Reviews, 113(7), 4755–4811. doi:10.1021/cr300402y
Bicyclic azaphilones with aliphatic side chain		penicilazaphilone B	Penicillium sclerotiorum PSU-A13 (endophytic)	C19H28O6	352.1886	Gao, J.-M., Yang, S.-X., & Qin, J.-C. (2013). Azaphilones: Chemistry and Biology. Chemical Reviews, 113(7), 4755–4811. doi:10.1021/cr300402y
Bicyclic azaphilones with aliphatic side chain		dechloroisochromophilone III	Penicillium multicolor FO-2338 Penicillium sclerotiorum PSU-A13 (endophyte) Penicillium citreonigrum AF033418	C19H26O4	318.1831	Gao, J.-M., Yang, S.-X., & Qin, J.-C. (2013). Azaphilones: Chemistry and Biology. Chemical Reviews, 113(7), 4755–4811. doi:10.1021/cr300402y
Bicyclic azaphilones with aliphatic side chain		dechloroisochromophilone IV (8-acetyldechloroisochromophilone III)	Penicillium multicolor FO-2338 Penicillium citreonigrum AF033418	C21H28O5	360.1937	Gao, J.-M., Yang, S.-X., & Qin, J.-C. (2013). Azaphilones: Chemistry and Biology. Chemical Reviews, 113(7), 4755–4811. doi:10.1021/cr300402y
Bicyclic azaphilones with aliphatic side chain		(8S,8α-R)-5-dechloro-7-deacetyl-1,O8,8,8a-tetrahydro-7-episclerotiorin	Penicillium sclerotiorum X11853	C19H26O4	318.1831	Gao, J.-M., Yang, S.-X., & Qin, J.-C. (2013). Azaphilones: Chemistry and Biology. Chemical Reviews, 113(7), 4755–4811. doi:10.1021/cr300402y
Bicyclic azaphilones with aliphatic side chain		asperfuranone	Aspergillus nidulans	C19H24O5	332.1624	Gao, J.-M., Yang, S.-X., & Qin, J.-C. (2013). Azaphilones: Chemistry and Biology. Chemical Reviews, 113(7), 4755–4811. doi:10.1021/cr300402y
Bicyclic azaphilones with aliphatic side chain		sassafrin D	Creosphaeria sassafras	C27H32O8	484.2097	D. N. Quang, T. Hashimoto, J. Fournier, M. Stadler, N. Radulović and Y. Asakawa, Tetrahedron, 2005, 61, 1743–1748.
Bicyclic azaphilones with aliphatic side chain		Unnamed	Penicillium 303#	C19H22O5	330.1467	Li, J., Yang, X., Lin, Y., Yuan, J., Lu, Y., Zhu, X., … Liu, L. (2014). Meroterpenes and azaphilones from marine mangrove endophytic fungus Penicillium 303#. Fitoterapia, 97, 241–246. doi:10.1016/j.fitote.2014.06.011
Bicyclic azaphilones with aliphatic side chain		Unnamed	Red yeast rice produced by uncharacterize d Monascus spp.	C21H28O6	376.1886	Chen W, Feng Y, Molnár I, Chen F. Nature and nurture: confluence of pathway determinism with metabolic and chemical serendipity diversifies Monascus azaphilone pigments. Nat Prod Rep. 17 avr 2019;36(4):561‑72.
Bicyclic azaphilones with aliphatic side chain		Unnamed	Red yeast rice produced by uncharacterize d Monascus spp.	C23H32O6	404.2199	Chen W, Feng Y, Molnár I, Chen F. Nature and nurture: confluence of pathway determinism with metabolic and chemical serendipity diversifies Monascus azaphilone pigments. Nat Prod Rep. 17 avr 2019;36(4):561‑72.
Bicyclic azaphilones with aliphatic side chain		lijiquinone	Ascomycete sp. F53 (F53),	C23H26O5	382.1780	Genome mining of a fungal endophyte of Taxus yunnanensis (Chinese yew) leads to the discovery of a novel azaphilone polyketide, lijiquinone Jesse W. Cain et al.
Bicyclic azaphilones with aliphatic side chain		ascochitine	Didymella sp. IEA-3B.1,	C15H16O5	276.0998	Didymellanosine, a new decahydrofluorene analogue, and ascolactone C from Didymella sp. IEA-3B.1, an endophyte of Terminalia catappa† Ni P. Ariantari et al.
Bicyclic azaphilones with aliphatic side chain		phomopsone A	Phomopsis sp. CGMCC No.5416	C17H22O5	306.1467	Yang Z-J, Zhang Y-F, Wu K, Xu Y-X, Meng X-G, Jiang Z-T, et al. New azaphilones, phomopsones A-C with biological activities from an endophytic fungus Phomopsis sp. CGMCC No.5416. Fitoterapia. 25 mars 2020;104573.
Bicyclic azaphilones with aliphatic side chain		phomopsone C	Phomopsis sp. CGMCC No.5416	C22H28O7	404.1835	Yang Z-J, Zhang Y-F, Wu K, Xu Y-X, Meng X-G, Jiang Z-T, et al. New azaphilones, phomopsones A-C with biological activities from an endophytic fungus Phomopsis sp. CGMCC No.5416. Fitoterapia. 25 mars 2020;104573.
Bicyclic azaphilones with aliphatic side chain		isochromophilol A	Penicillium sp. RO369	C19H26O5	334.1780	Ishiuchi, Kan'ichiro & Kitanaka, Susumu & Hirose, Dai & Takahashi, Yoriko & Miyagawa, Ryu & Watanabe, Kohei. (2019). Isochromophilol A, A New Azaphilone Isolated from Penicillium Sp. RO369, A Leaf Litter Inhabiting Fungus from Tsuga Diversifolia. HETEROCYCLES. 98. 10.3987/COM-19-14164.
Bicyclic azaphilones with aliphatic side chain and aromatic ring		penidicitrinin B	Penicillium citrinum HGY1-5 (volcano-ash-derived fungus)	C23H30O5	386.2093	Gao, J.-M., Yang, S.-X., & Qin, J.-C. (2013). Azaphilones: Chemistry and Biology. Chemical Reviews, 113(7), 4755–4811. doi:10.1021/cr300402y
Bicyclic azaphilones with aliphatic side chain and aromatic ring		cohaerin A	Hypoxylon cohaerens	C26H28O6	436.1886	Gao, J.-M., Yang, S.-X., & Qin, J.-C. (2013). Azaphilones: Chemistry and Biology. Chemical Reviews, 113(7), 4755–4811. doi:10.1021/cr300402y
Bicyclic azaphilones with aliphatic side chain and aromatic ring		Cohaerin K	Annulohypoxylon cohaerens	C27H34O5	438.2406	Surup, F., Mohr, K. I., Jansen, R., & Stadler, M. (2013). Cohaerins G–K, azaphilone pigments from Annulohypoxylon cohaerens and absolute stereochemistry of cohaerins C–K. Phytochemistry, 95, 252–258. doi:10.1016/j.phytochem.2013.07.027
Bicyclic azaphilones with aliphatic side chain and aromatic ring		Penicilone B	Penicillium janthinellum HK1‑6	C29H34O6	478.2355	Chen, M., Shen, N.-X., Chen, Z.-Q., Zhang, F.-M., & Chen, Y. (2017). Penicilones A–D, Anti-MRSA Azaphilones from the Marine-Derived Fungus Penicillium janthinellum HK1-6. Journal of Natural Products, 80(4), 1081–1086. doi:10.1021/acs.jnatprod.6b01179
Bicyclic azaphilones with aliphatic side chain and aromatic ring		Pleosporalone C	Pleosporales sp. CF09-1	C27H28O8	480.1784	Cao, F., Meng, Z.-H., Mu, X., Yue, Y.-F., & Zhu, H.-J. (2019). Absolute Configuration of Bioactive Azaphilones from the Marine-Derived Fungus Pleosporales sp. CF09-1. Journal of Natural Products. doi:10.1021/acs.jnatprod.8b01030
Bicyclic azaphilones with aliphatic side chain and aromatic ring	undefined C11 epimer	Pleosporalone G Pleosporalone H	Pleosporales sp. CF09-1	C23H30O8	434.1941	Cao, F., Meng, Z.-H., Mu, X., Yue, Y.-F., & Zhu, H.-J. (2019). Absolute Configuration of Bioactive Azaphilones from the Marine-Derived Fungus Pleosporales sp. CF09-1. Journal of Natural Products. doi:10.1021/acs.jnatprod.8b01030
Bicyclic azaphilones with aromatic ring		penicillanthranin A	Penicillium citrinum PSU-F51 (marine fungus)	C28H24O10	520.1369	Gao, J.-M., Yang, S.-X., & Qin, J.-C. (2013). Azaphilones: Chemistry and Biology. Chemical Reviews, 113(7), 4755–4811. doi:10.1021/cr300402y
Bicyclic azaphilones with aromatic ring		penicillanthranin B	Penicillium citrinum PSU-F51	C28H24O11	536.1319	Gao, J.-M., Yang, S.-X., & Qin, J.-C. (2013). Azaphilones: Chemistry and Biology. Chemical Reviews, 113(7), 4755–4811. doi:10.1021/cr300402y
Bicyclic azaphilones with aromatic ring		aspergilone A	Aspergillus sp. ZJ-2008001 (marine fungus)	C26H26O3	386.1882	Gao, J.-M., Yang, S.-X., & Qin, J.-C. (2013). Azaphilones: Chemistry and Biology. Chemical Reviews, 113(7), 4755–4811. doi:10.1021/cr300402y
Bicyclic azaphilones with aromatic ring		Penicilone E	Penicillium janthinellum HK1‑6	C17H15O5	299.092	Chen, M., Shen, N.-X., Chen, Z.-Q., Zhang, F.-M., & Chen, Y. (2017). Penicilones A–D, Anti-MRSA Azaphilones from the Marine-Derived Fungus Penicillium janthinellum HK1-6. Journal of Natural Products, 80(4), 1081–1086. doi:10.1021/acs.jnatprod.6b01179
Bicyclic azaphilones with aromatic ring		Pleosporalone A	Pleosporales sp.	C17H14O5	298.0841	Cao, F., Yang, J.-K., Liu, Y.-F., Zhu, H.-J., & Wang, C.-Y. (2016). Pleosporalone A, the first azaphilone characterized with aromatic A-ring from a marine-derivedPleosporalessp. fungus. Natural Product Research, 30(21), 2448–2452. doi:10.1080/14786419.2016.1198352
Bicyclic azaphilones with cyclononane ring		cytosporolide A	Cytospora sp. XZ014 (Coelomycetes)	C33H48O9	588.3298	Gao, J.-M., Yang, S.-X., & Qin, J.-C. (2013). Azaphilones: Chemistry and Biology. Chemical Reviews, 113(7), 4755–4811. doi:10.1021/cr300402y
Bicyclic azaphilones with cyclononane ring		cytosporolide B	Cytospora sp. XZ014	C32H46O8	558.3193	Gao, J.-M., Yang, S.-X., & Qin, J.-C. (2013). Azaphilones: Chemistry and Biology. Chemical Reviews, 113(7), 4755–4811. doi:10.1021/cr300402y
Bicyclic azaphilones with cyclononane ring		cytosporolide C	Cytospora sp. XZ014	C35H50O10	630.3404	Gao, J.-M., Yang, S.-X., & Qin, J.-C. (2013). Azaphilones: Chemistry and Biology. Chemical Reviews, 113(7), 4755–4811. doi:10.1021/cr300402y
Bicyclic azaphilones with ergostane skeleton and o-orsellinic acid		ergophilone A	Penicillium sp. BM-99	C50H60O10	820.4186	Gao, J.-M., Yang, S.-X., & Qin, J.-C. (2013). Azaphilones: Chemistry and Biology. Chemical Reviews, 113(7), 4755–4811. doi:10.1021/cr300402y
Bicyclic azaphilones with ergostane skeleton and o-orsellinic acid		ergophilone B	Penicillium sp. BM-99	C49H58O10	806.4030	Gao, J.-M., Yang, S.-X., & Qin, J.-C. (2013). Azaphilones: Chemistry and Biology. Chemical Reviews, 113(7), 4755–4811. doi:10.1021/cr300402y
Bicyclic azaphilones with o-orsellinic acid or o-orsellinic acid derivatives		comazaphilone G	Penicillium variabile	C22H24O7	400.1522	Shao, Y., Yan, H., Yin, T., Sun, Z., Xie, H., Song, L., … Li, W. (2019). New azaphilones from Penicillium variabile, a fungal endophyte from roots of Aconitum vilmorinianum. The Journal of Antibiotics. doi:10.1038/s41429-019-0250-4
Bicyclic azaphilones with o-orsellinic acid or o-orsellinic acid derivatives		comazaphilone H	Penicillium variabile	C22H26O7	402.1679	Shao, Y., Yan, H., Yin, T., Sun, Z., Xie, H., Song, L., … Li, W. (2019). New azaphilones from Penicillium variabile, a fungal endophyte from roots of Aconitum vilmorinianum. The Journal of Antibiotics. doi:10.1038/s41429-019-0250-4
Bicyclic azaphilones with o-orsellinic acid or o-orsellinic acid derivatives		epi-pinophilin B	Aspergillus fumigatus 14-27	C21H22O8	402.1315	Ya-Hui Zhang, Xiao-Yue Peng, Li-Xi Feng, Hua-Jie Zhu, Fei Cao & Chang-Yun Wang (2019): A new epimer of azaphilone derivative pinophilin B from the gorgonian-derived fungus Aspergillus fumigatus 14–27, Natural Product Research, DOI: 10.1080/14786419.2019.1669028
Bicyclic azaphilones with o-orsellinic acid or o-orsellinic acid derivatives		Mitorubrin 1o	Hypoxylon fragiforme	C21H18O7	382.1053	Svilar, L., Stankov-Jovanovic, V., Lesage, D., Dossmann, H., & Tabet, J.-C. (2012). High-resolution mass spectrometry and hydrogen/deuterium exchange study of mitorubrin azaphilones and nitrogenized analogues. Journal of Mass Spectrometry, 47(8), 969–977. doi:10.1002/jms.3044
Bicyclic azaphilones with o-orsellinic acid or o-orsellinic acid derivatives		Mitorubrin 2o	Hypoxylon fragiforme	C21H16O9	412.0794	Svilar, L., Stankov-Jovanovic, V., Lesage, D., Dossmann, H., & Tabet, J.-C. (2012). High-resolution mass spectrometry and hydrogen/deuterium exchange study of mitorubrin azaphilones and nitrogenized analogues. Journal of Mass Spectrometry, 47(8), 969–977. doi:10.1002/jms.3044
Bicyclic azaphilones with o-orsellinic acid or o-orsellinic acid derivatives		Mitorubrin 3o	Hypoxylon fragiforme	C21H18O8	398.3670	Svilar, L., Stankov-Jovanovic, V., Lesage, D., Dossmann, H., & Tabet, J.-C. (2012). High-resolution mass spectrometry and hydrogen/deuterium exchange study of mitorubrin azaphilones and nitrogenized analogues. Journal of Mass Spectrometry, 47(8), 969–977. doi:10.1002/jms.3044
Bicyclic azaphilones with o-orsellinic acid or o-orsellinic acid derivatives		Mitorubrin 4o	Hypoxylon fragiforme	C23H20O9	440.1107	Svilar, L., Stankov-Jovanovic, V., Lesage, D., Dossmann, H., & Tabet, J.-C. (2012). High-resolution mass spectrometry and hydrogen/deuterium exchange study of mitorubrin azaphilones and nitrogenized analogues. Journal of Mass Spectrometry, 47(8), 969–977. doi:10.1002/jms.3044
Bicyclic azaphilones with o-orsellinic acid or o-orsellinic acid derivatives		deacetylisowortmin	Trichoderma sp. MFF-1 (endophyte)	C21H24O7	388.1522	Gao, J.-M., Yang, S.-X., & Qin, J.-C. (2013). Azaphilones: Chemistry and Biology. Chemical Reviews, 113(7), 4755–4811. doi:10.1021/cr300402y
Bicyclic azaphilones with o-orsellinic acid or o-orsellinic acid derivatives		comazaphilone D	Penicillium commune QSD-17	C21H22O7	386.1366	Gao, J.-M., Yang, S.-X., & Qin, J.-C. (2013). Azaphilones: Chemistry and Biology. Chemical Reviews, 113(7), 4755–4811. doi:10.1021/cr300402y
Bicyclic azaphilones with o-orsellinic acid or o-orsellinic acid derivatives		comazaphilone E	Penicillium commune QSD-17	C22H24O8	416.1471	Gao, J.-M., Yang, S.-X., & Qin, J.-C. (2013). Azaphilones: Chemistry and Biology. Chemical Reviews, 113(7), 4755–4811. doi:10.1021/cr300402y
Bicyclic azaphilones with o-orsellinic acid or o-orsellinic acid derivatives		comazaphilone F	Penicillium commune QSD-17	C22H26O8	418.1628	Gao, J.-M., Yang, S.-X., & Qin, J.-C. (2013). Azaphilones: Chemistry and Biology. Chemical Reviews, 113(7), 4755–4811. doi:10.1021/cr300402y
Bicyclic azaphilones with o-orsellinic acid or o-orsellinic acid derivatives		Sch 725680 (berkazaphilone C)	Aspergillus sp. SPRI-0814 Penicillium pinophilum Hedgcok Penicillium rubrum Stoll	C21H22O7	386.1366	Gao, J.-M., Yang, S.-X., & Qin, J.-C. (2013). Azaphilones: Chemistry and Biology. Chemical Reviews, 113(7), 4755–4811. doi:10.1021/cr300402y
Bicyclic azaphilones with o-orsellinic acid or o-orsellinic acid derivatives		purpurquinone A	Penicillium purpurogenum JS03-21	C21H20O9	416.1107	Gao, J.-M., Yang, S.-X., & Qin, J.-C. (2013). Azaphilones: Chemistry and Biology. Chemical Reviews, 113(7), 4755–4811. doi:10.1021/cr300402y
Bicyclic azaphilones with o-orsellinic acid or o-orsellinic acid derivatives		kasanosin A	Talaromyces sp. KA02K3	C22H24O8	416.1471	Gao, J.-M., Yang, S.-X., & Qin, J.-C. (2013). Azaphilones: Chemistry and Biology. Chemical Reviews, 113(7), 4755–4811. doi:10.1021/cr300402y
Bicyclic azaphilones with o-orsellinic acid or o-orsellinic acid derivatives		purpurquinone B	Penicillium purpurogenum JS03-21	C21H20O10	432.1056	Gao, J.-M., Yang, S.-X., & Qin, J.-C. (2013). Azaphilones: Chemistry and Biology. Chemical Reviews, 113(7), 4755–4811. doi:10.1021/cr300402y
Bicyclic azaphilones with o-orsellinic acid or o-orsellinic acid derivatives		purpurquinone C	Penicillium purpurogenum JS03-21	C21H20O8	400.1158	Gao, J.-M., Yang, S.-X., & Qin, J.-C. (2013). Azaphilones: Chemistry and Biology. Chemical Reviews, 113(7), 4755–4811. doi:10.1021/cr300402y
Bicyclic azaphilones with o-orsellinic acid or o-orsellinic acid derivatives		entonaemin A	Hypoxylon rubiginosum Hypoxylon rutilum Entonaema splendens (Xylariaceae) Talaromyces sp. T1BF (endophytic)	C21H22O8	402.1315	Gao, J.-M., Yang, S.-X., & Qin, J.-C. (2013). Azaphilones: Chemistry and Biology. Chemical Reviews, 113(7), 4755–4811. doi:10.1021/cr300402y
Bicyclic azaphilones with o-orsellinic acid or o-orsellinic acid derivatives		entonaemin B	Hypoxylon rutilum Entonaema splendens (Xylariaceae) Talaromyces sp. T1BF (endophytic) entonaemin B (166) Entonaema splendens	C21H22O8	402.1315	Gao, J.-M., Yang, S.-X., & Qin, J.-C. (2013). Azaphilones: Chemistry and Biology. Chemical Reviews, 113(7), 4755–4811. doi:10.1021/cr300402y
Bicyclic azaphilones with o-orsellinic acid or o-orsellinic acid derivatives		rubiginosin A	Hypoxylon rubiginosum Hypoxylon rutilum	C23H24O9	444.1420	Gao, J.-M., Yang, S.-X., & Qin, J.-C. (2013). Azaphilones: Chemistry and Biology. Chemical Reviews, 113(7), 4755–4811. doi:10.1021/cr300402y
Bicyclic azaphilones with o-orsellinic acid or o-orsellinic acid derivatives		(−)-mitorubrin	H. fendleri E. cinnabarina H. aucklandiae H. crocopeplum H. dingleyae H. fragiforme H. fuscum H. haematostroma H. howeianum H. pilgerianum H. rubiginosum H. subcrocopeplum H. subgilvum H. subrutiloides H. subticiense H. ticinensePenicillium rubrum T. flavus T. macrosporus T. mimosinus T. udagawae T. wortmannii	C21H18O7	382.1053	Gao, J.-M., Yang, S.-X., & Qin, J.-C. (2013). Azaphilones: Chemistry and Biology. Chemical Reviews, 113(7), 4755–4811. doi:10.1021/cr300402y Osmanova N, Schultze W, Ayoub N. Azaphilones: a class of fungal metabolites with diverse biological activities. Phytochem Rev Proc Phytochem Soc Eur [Internet]. 2010 [cité 6 mai 2020]; Disponible sur: https://agris.fao.org/agris-search/search.do?recordID=US2…
Bicyclic azaphilones with o-orsellinic acid or o-orsellinic acid derivatives		wortmin	Penicillium wortmanni Klöcker	C24H28O8	444.1784	Gao, J.-M., Yang, S.-X., & Qin, J.-C. (2013). Azaphilones: Chemistry and Biology. Chemical Reviews, 113(7), 4755–4811. doi:10.1021/cr300402y
Bicyclic azaphilones with o-orsellinic acid or o-orsellinic acid derivatives		(−)-mitorubrinal	Talaromyces austrocalifornicus Talaromyces convolutus	C21H16O8	396.0845	Gao, J.-M., Yang, S.-X., & Qin, J.-C. (2013). Azaphilones: Chemistry and Biology. Chemical Reviews, 113(7), 4755–4811. doi:10.1021/cr300402y
Bicyclic azaphilones with o-orsellinic acid or o-orsellinic acid derivatives		(−)-mitorubrinic acid	Talaromyces austrocalifornicus Talaromyces convolutus Penicillium funiculosum IFO 6345 Penicillium funiculosum CCM F-8080 Cochliobolus lunatus Penicillium vermiculatum IV/5 Penicillium rubrum	C21H16O9	412.0794	Gao, J.-M., Yang, S.-X., & Qin, J.-C. (2013). Azaphilones: Chemistry and Biology. Chemical Reviews, 113(7), 4755–4811. doi:10.1021/cr300402y
Bicyclic azaphilones with o-orsellinic acid or o-orsellinic acid derivatives		(−)-mitorubrinol	Penicillium rubrum Penicillium funiculosum Talaromyces austrocalifornicus Talaromyces convolutus Penicillium vermiculatum Dang	C21H18O8	398.1002	Gao, J.-M., Yang, S.-X., & Qin, J.-C. (2013). Azaphilones: Chemistry and Biology. Chemical Reviews, 113(7), 4755–4811. doi:10.1021/cr300402y
Bicyclic azaphilones with o-orsellinic acid or o-orsellinic acid derivatives		(+)-mitorubrin	Talaromyces emodensis Talaromyces hachijoensis Talaromyces wortmannii var.sublevisporus Hypoxylon fragiforme Emericella falconensis Emericella fruticulosa Talaromyces sp. T1BF (endophyte)	C21H18O7	382.1053	Gao, J.-M., Yang, S.-X., & Qin, J.-C. (2013). Azaphilones: Chemistry and Biology. Chemical Reviews, 113(7), 4755–4811. doi:10.1021/cr300402y
Bicyclic azaphilones with o-orsellinic acid or o-orsellinic acid derivatives		(+)-mitorubrinic acid	Hypoxylon fragiforme	C21H16O9	412.0794	Gao, J.-M., Yang, S.-X., & Qin, J.-C. (2013). Azaphilones: Chemistry and Biology. Chemical Reviews, 113(7), 4755–4811. doi:10.1021/cr300402y
Bicyclic azaphilones with o-orsellinic acid or o-orsellinic acid derivatives		hypomiltin	Hypoxylon hypomiltum Hypoxylon intermedium, Hypoxylon perforatum Hypoxylon trugodes, Pulveria porrecta	C23H22O9	442.1264	Gao, J.-M., Yang, S.-X., & Qin, J.-C. (2013). Azaphilones: Chemistry and Biology. Chemical Reviews, 113(7), 4755–4811. doi:10.1021/cr300402y
Bicyclic azaphilones with o-orsellinic acid or o-orsellinic acid derivatives		(+)-mitorubrinic acid B	Penicillium funiculosum IFO 6345	C21H18O9	414.0951	Gao, J.-M., Yang, S.-X., & Qin, J.-C. (2013). Azaphilones: Chemistry and Biology. Chemical Reviews, 113(7), 4755–4811. doi:10.1021/cr300402y
Bicyclic azaphilones with o-orsellinic acid or o-orsellinic acid derivatives		(+)-mitorubrinol	Talaromyces emodensis Talaromyces wortmannii var. sublevisporus Hypoxylon fragiforme	C21H18O8	398.1002	Gao, J.-M., Yang, S.-X., & Qin, J.-C. (2013). Azaphilones: Chemistry and Biology. Chemical Reviews, 113(7), 4755–4811. doi:10.1021/cr300402y
Bicyclic azaphilones with o-orsellinic acid or o-orsellinic acid derivatives		Sch1385568	Aspergillus sp. SPRI-0814	C21H20O7	384.1209	Gao, J.-M., Yang, S.-X., & Qin, J.-C. (2013). Azaphilones: Chemistry and Biology. Chemical Reviews, 113(7), 4755–4811. doi:10.1021/cr300402y
Bicyclic azaphilones with o-orsellinic acid or o-orsellinic acid derivatives		comazaphilone A	Penicillium commune QSD-17	C22H26O7	402.1679	Gao, J.-M., Yang, S.-X., & Qin, J.-C. (2013). Azaphilones: Chemistry and Biology. Chemical Reviews, 113(7), 4755–4811. doi:10.1021/cr300402y
Bicyclic azaphilones with o-orsellinic acid or o-orsellinic acid derivatives		comazaphilone B	Penicillium commune QSD-17	C22H26O8	418.1628	Gao, J.-M., Yang, S.-X., & Qin, J.-C. (2013). Azaphilones: Chemistry and Biology. Chemical Reviews, 113(7), 4755–4811. doi:10.1021/cr300402y
Bicyclic azaphilones with o-orsellinic acid or o-orsellinic acid derivatives		comazaphilone C	Penicillium commune QSD-17	C22H24O8	416.1471	Gao, J.-M., Yang, S.-X., & Qin, J.-C. (2013). Azaphilones: Chemistry and Biology. Chemical Reviews, 113(7), 4755–4811. doi:10.1021/cr300402y
Bicyclic azaphilones with o-orsellinic acid or o-orsellinic acid derivatives		(+)-mitorubrinol acetate	Talaromyces emodensis Talaromyces hachijoensis Talaromyces wortmannii var. sublevisporus Hypoxylon fragiforme Entonaema splendens	C23H20O9	440.1107	Gao, J.-M., Yang, S.-X., & Qin, J.-C. (2013). Azaphilones: Chemistry and Biology. Chemical Reviews, 113(7), 4755–4811. doi:10.1021/cr300402y
Bicyclic azaphilones with o-orsellinic acid or o-orsellinic acid derivatives		kasanosin B	Talaromyces sp. KA02K3	C22H24O8	416.1471	Gao, J.-M., Yang, S.-X., & Qin, J.-C. (2013). Azaphilones: Chemistry and Biology. Chemical Reviews, 113(7), 4755–4811. doi:10.1021/cr300402y
Bicyclic azaphilones with o-orsellinic acid or o-orsellinic acid derivatives		kasanosin C	Talaromyces sp. T1BF (endophytic)	C22H24O7	400.1522	Gao, J.-M., Yang, S.-X., & Qin, J.-C. (2013). Azaphilones: Chemistry and Biology. Chemical Reviews, 113(7), 4755–4811. doi:10.1021/cr300402y
Bicyclic azaphilones with o-orsellinic acid or o-orsellinic acid derivatives		monomethyl-(S)-mitorubrin monomethylmitorubrin	Emericella falconensis Penicillium radicum FKI-3765-2 Talaromyces tardifaciens	C22H20O7	396.1209	N. Ogasawara and K.-I. Kawai, Phytochemistry, 1998, 47, 1131–1135. K. Nozawa, R. Saito, S.-I. Udagawa, S. Nakajima and K.-I. Kawai, Phytochemistry, 1995, 39, 719–721.
Bicyclic azaphilones with o-orsellinic acid or o-orsellinic acid derivatives		pinophilin A (Berkazaphilone B)	Penicillium pinophilum Hedgcok Penicillium rubrum Stoll	C21H22O7	386.1366	Gao, J.-M., Yang, S.-X., & Qin, J.-C. (2013). Azaphilones: Chemistry and Biology. Chemical Reviews, 113(7), 4755–4811. doi:10.1021/cr300402y
Bicyclic azaphilones with o-orsellinic acid or o-orsellinic acid derivatives		monomethyldihydromitorubrin	Emericella falconensis Emericella fruticulosa	C22H22O9	430.4090	Gao, J.-M., Yang, S.-X., & Qin, J.-C. (2013). Azaphilones: Chemistry and Biology. Chemical Reviews, 113(7), 4755–4811. doi:10.1021/cr300402y
Bicyclic azaphilones with o-orsellinic acid or o-orsellinic acid derivatives		pinophilin B 3-[(2S)-butan-2-yl]-7-(dihydroxymethylidene)-4-methylisochromene-6,8-dione	Penicillium pinophilum Hedgcok Ascochyta pisi Lib Ascochyta fabae Speg	C21H22O8	402.1315	Gao, J.-M., Yang, S.-X., & Qin, J.-C. (2013). Azaphilones: Chemistry and Biology. Chemical Reviews, 113(7), 4755–4811. doi:10.1021/cr300402y
Bicyclic azaphilones with o-orsellinic acid or o-orsellinic acid derivatives		pinophilin C	Cordyceps gracilioides	C21H20O9	416.1107	Pei-Yao Wei et al. (2015) Three New Pigment Protein Tyrosine Phosphatases Inhibitors from the Insect Parasite Fungus Cordyceps gracilioides: Terreusinone A, Pinophilin C and Cryptosporioptide A
Bicyclic azaphilones with o-orsellinic acid or o-orsellinic acid derivatives		4′-hydroxy-3′-methoxy-(+)-(S)-mitorubrin	Penicillium citrinum Thom. MF6409 Penicillium radicum FKI-3765-2	C22H20O8	412.1158	Gao, J.-M., Yang, S.-X., & Qin, J.-C. (2013). Azaphilones: Chemistry and Biology. Chemical Reviews, 113(7), 4755–4811. doi:10.1021/cr300402y
Bicyclic azaphilones with o-orsellinic acid or o-orsellinic acid derivatives		6′-Hydroxy-3′-methoxymitorubrin	Penicillium radicum FKI-3765-2	C22H20O8	412.1158	Gao, J.-M., Yang, S.-X., & Qin, J.-C. (2013). Azaphilones: Chemistry and Biology. Chemical Reviews, 113(7), 4755–4811. doi:10.1021/cr300402y
Bicyclic azaphilones with o-orsellinic acid or o-orsellinic acid derivatives		falconensin A	Emericella falconensis Horie, Miyaji, Nishimura, and Udagawa NHL 2999	C23H24O7Cl2	482.0899	Gao, J.-M., Yang, S.-X., & Qin, J.-C. (2013). Azaphilones: Chemistry and Biology. Chemical Reviews, 113(7), 4755–4811. doi:10.1021/cr300402y
Bicyclic azaphilones with o-orsellinic acid or o-orsellinic acid derivatives		falconensin B	Emericella falconensis Horie	C23H26O7Cl2	484.1056	Gao, J.-M., Yang, S.-X., & Qin, J.-C. (2013). Azaphilones: Chemistry and Biology. Chemical Reviews, 113(7), 4755–4811. doi:10.1021/cr300402y
Bicyclic azaphilones with o-orsellinic acid or o-orsellinic acid derivatives		falconensin C	Emericella falconensis Horie	C25H26O8Cl2	524.1005	Gao, J.-M., Yang, S.-X., & Qin, J.-C. (2013). Azaphilones: Chemistry and Biology. Chemical Reviews, 113(7), 4755–4811. doi:10.1021/cr300402y
Bicyclic azaphilones with o-orsellinic acid or o-orsellinic acid derivatives		falconensin D	Emericella falconensis Horie	C25H28O8Cl2	526.1161	Gao, J.-M., Yang, S.-X., & Qin, J.-C. (2013). Azaphilones: Chemistry and Biology. Chemical Reviews, 113(7), 4755–4811. doi:10.1021/cr300402y
Bicyclic azaphilones with o-orsellinic acid or o-orsellinic acid derivatives		falconensin E	Emericella falconensis Emericella fruticulosa (Raper and Fennell) Malloch and Cain strain IFO 30841	C23H25O7Cl	448.1289	Gao, J.-M., Yang, S.-X., & Qin, J.-C. (2013). Azaphilones: Chemistry and Biology. Chemical Reviews, 113(7), 4755–4811. doi:10.1021/cr300402y
Bicyclic azaphilones with o-orsellinic acid or o-orsellinic acid derivatives		falconensin F	Emericella falconensis Emericella fruticulosa (Raper and Fennell) Malloch and Cain strain IFO 30841	C23H26O7	414.1679	Gao, J.-M., Yang, S.-X., & Qin, J.-C. (2013). Azaphilones: Chemistry and Biology. Chemical Reviews, 113(7), 4755–4811. doi:10.1021/cr300402y
Bicyclic azaphilones with o-orsellinic acid or o-orsellinic acid derivatives		falconensin G	Emericella falconensis Emericella fruticulosa (Raper and Fennell) Malloch and Cain strain IFO 30841	C25H28O8	456.1784	Gao, J.-M., Yang, S.-X., & Qin, J.-C. (2013). Azaphilones: Chemistry and Biology. Chemical Reviews, 113(7), 4755–4811. doi:10.1021/cr300402y
Bicyclic azaphilones with o-orsellinic acid or o-orsellinic acid derivatives		falconensin H	Emericella falconensis	C22H18Cl2O7	464.0430	Gao, J.-M., Yang, S.-X., & Qin, J.-C. (2013). Azaphilones: Chemistry and Biology. Chemical Reviews, 113(7), 4755–4811. doi:10.1021/cr300402y
Bicyclic azaphilones with o-orsellinic acid or o-orsellinic acid derivatives		falconensin I	Emericella falconensis Emericella fruticulosa (Raper and Fennell) Malloch and Cain strain IFO 30841	C22H24O7	400.1522	Gao, J.-M., Yang, S.-X., & Qin, J.-C. (2013). Azaphilones: Chemistry and Biology. Chemical Reviews, 113(7), 4755–4811. doi:10.1021/cr300402y
Bicyclic azaphilones with o-orsellinic acid or o-orsellinic acid derivatives		falconensin J	Emericella falconensis Emericella fruticulosa	C22H26O7	402.1679	Gao, J.-M., Yang, S.-X., & Qin, J.-C. (2013). Azaphilones: Chemistry and Biology. Chemical Reviews, 113(7), 4755–4811. doi:10.1021/cr300402y
Bicyclic azaphilones with o-orsellinic acid or o-orsellinic acid derivatives		falconensin K	Emericella falconensis Emericella fruticulosa	C22H23O7Cl	434.1132	Gao, J.-M., Yang, S.-X., & Qin, J.-C. (2013). Azaphilones: Chemistry and Biology. Chemical Reviews, 113(7), 4755–4811. doi:10.1021/cr300402y
Bicyclic azaphilones with o-orsellinic acid or o-orsellinic acid derivatives		falconensin L	Emericella falconensis Emericella fruticulosa	C22H25O7Cl	436.1289	Gao, J.-M., Yang, S.-X., & Qin, J.-C. (2013). Azaphilones: Chemistry and Biology. Chemical Reviews, 113(7), 4755–4811. doi:10.1021/cr300402y
Bicyclic azaphilones with o-orsellinic acid or o-orsellinic acid derivatives		falconensin M	Emericella falconensis Emericella fruticulosa	C22H22O7Cl2	468.0743	Gao, J.-M., Yang, S.-X., & Qin, J.-C. (2013). Azaphilones: Chemistry and Biology. Chemical Reviews, 113(7), 4755–4811. doi:10.1021/cr300402y
Bicyclic azaphilones with o-orsellinic acid or o-orsellinic acid derivatives		falconensin N	Emericella falconensis Emericella fruticulosa	C22H24O7Cl2	470.0899	Gao, J.-M., Yang, S.-X., & Qin, J.-C. (2013). Azaphilones: Chemistry and Biology. Chemical Reviews, 113(7), 4755–4811. doi:10.1021/cr300402y
Bicyclic azaphilones with o-orsellinic acid or o-orsellinic acid derivatives		falconensin O	Aspergillus falconensis,	C24H24Cl2O8	510.0848	Azaphilones from the Red Sea Fungus Aspergillus falconensis, Dina H. El-Kashef et al.
Bicyclic azaphilones with o-orsellinic acid or o-orsellinic acid derivatives		falconensin P	Aspergillus falconensis,	C24H26Cl2O8	512.1005	Azaphilones from the Red Sea Fungus Aspergillus falconensis, Dina H. El-Kashef et al.
Bicyclic azaphilones with o-orsellinic acid or o-orsellinic acid derivatives		Montagnuphilone A	Montagnulaceae sp. DM0194	C21H20O9	416.1107	Luo, J.-G., Xu, Y., Sandberg, D. C., Arnold, A. E., & Gunatilaka, A. A. L. (2017). Montagnuphilones A–G, Azaphilones from Montagnulaceae sp. DM0194, a Fungal Endophyte of Submerged Roots of Persicaria amphibia. Journal of Natural Products, 80(1), 76–81. doi:10.1021/acs.jnatprod.6b00714
Bicyclic azaphilones with o-orsellinic acid or o-orsellinic acid derivatives		Montagnuphilone B	Montagnulaceae sp. DM0194	C21H22O9	418.1264	Luo, J.-G., Xu, Y., Sandberg, D. C., Arnold, A. E., & Gunatilaka, A. A. L. (2017). Montagnuphilones A–G, Azaphilones from Montagnulaceae sp. DM0194, a Fungal Endophyte of Submerged Roots of Persicaria amphibia. Journal of Natural Products, 80(1), 76–81. doi:10.1021/acs.jnatprod.6b00714
Bicyclic azaphilones with o-orsellinic acid or o-orsellinic acid derivatives		Montagnuphilone C	Montagnulaceae sp. DM0194	C21H24O10	436.1369	Luo, J.-G., Xu, Y., Sandberg, D. C., Arnold, A. E., & Gunatilaka, A. A. L. (2017). Montagnuphilones A–G, Azaphilones from Montagnulaceae sp. DM0194, a Fungal Endophyte of Submerged Roots of Persicaria amphibia. Journal of Natural Products, 80(1), 76–81. doi:10.1021/acs.jnatprod.6b00714
Bicyclic azaphilones with o-orsellinic acid or o-orsellinic acid derivatives		Montagnuphilone D	Montagnulaceae sp. DM0194	C21H24O10	436.1369	Luo, J.-G., Xu, Y., Sandberg, D. C., Arnold, A. E., & Gunatilaka, A. A. L. (2017). Montagnuphilones A–G, Azaphilones from Montagnulaceae sp. DM0194, a Fungal Endophyte of Submerged Roots of Persicaria amphibia. Journal of Natural Products, 80(1), 76–81. doi:10.1021/acs.jnatprod.6b00714
Bicyclic azaphilones with o-orsellinic acid or o-orsellinic acid derivatives		Montagnuphilone E	Montagnulaceae sp. DM0194	C21H26O9	422.1577	Luo, J.-G., Xu, Y., Sandberg, D. C., Arnold, A. E., & Gunatilaka, A. A. L. (2017). Montagnuphilones A–G, Azaphilones from Montagnulaceae sp. DM0194, a Fungal Endophyte of Submerged Roots of Persicaria amphibia. Journal of Natural Products, 80(1), 76–81. doi:10.1021/acs.jnatprod.6b00714
Bicyclic azaphilones with o-orsellinic acid or o-orsellinic acid derivatives		Montagnuphilone F	Montagnulaceae sp. DM0194	C21H26O9	422.1577	Luo, J.-G., Xu, Y., Sandberg, D. C., Arnold, A. E., & Gunatilaka, A. A. L. (2017). Montagnuphilones A–G, Azaphilones from Montagnulaceae sp. DM0194, a Fungal Endophyte of Submerged Roots of Persicaria amphibia. Journal of Natural Products, 80(1), 76–81. doi:10.1021/acs.jnatprod.6b00714
Bicyclic azaphilones with o-orsellinic acid or o-orsellinic acid derivatives		Montagnuphilone G	Montagnulaceae sp. DM0194	C22H24O9	432.1420	Luo, J.-G., Xu, Y., Sandberg, D. C., Arnold, A. E., & Gunatilaka, A. A. L. (2017). Montagnuphilones A–G, Azaphilones from Montagnulaceae sp. DM0194, a Fungal Endophyte of Submerged Roots of Persicaria amphibia. Journal of Natural Products, 80(1), 76–81. doi:10.1021/acs.jnatprod.6b00714
Bicyclic azaphilones with o-orsellinic acid or o-orsellinic acid derivatives		Pinophilin D	Penicillium pinophilum	C21H22O8	402.1315	Zhao, D.-L., Shao, C.-L., Zhang, Q., Wang, K.-L., Guan, F.-F., Shi, T., & Wang, C.-Y. (2015). Azaphilone and Diphenyl Ether Derivatives from a Gorgonian-Derived Strain of the Fungus Penicillium pinophilum. Journal of Natural Products, 78(9), 2310–2314. doi:10.1021/acs.jnatprod.5b00575
Bicyclic azaphilones with o-orsellinic acid or o-orsellinic acid derivatives		Pinophilin E	Penicillium pinophilum	C21H24O8	404.1471	Zhao, D.-L., Shao, C.-L., Zhang, Q., Wang, K.-L., Guan, F.-F., Shi, T., & Wang, C.-Y. (2015). Azaphilone and Diphenyl Ether Derivatives from a Gorgonian-Derived Strain of the Fungus Penicillium pinophilum. Journal of Natural Products, 78(9), 2310–2314. doi:10.1021/acs.jnatprod.5b00575
Bicyclic azaphilones with o-orsellinic acid or o-orsellinic acid derivatives		Pinophilin F	Penicillium pinophilum	C21H20O9	416.1107	Zhao, D.-L., Shao, C.-L., Zhang, Q., Wang, K.-L., Guan, F.-F., Shi, T., & Wang, C.-Y. (2015). Azaphilone and Diphenyl Ether Derivatives from a Gorgonian-Derived Strain of the Fungus Penicillium pinophilum. Journal of Natural Products, 78(9), 2310–2314. doi:10.1021/acs.jnatprod.5b00575
Bicyclic azaphilones with o-orsellinic acid or o-orsellinic acid derivatives		Pinophilin G	Penicillim pinophilum	C21H20O9	416.1107	Fractionation of Azaphilones from Secondary Metabolites of Marine-Derived Fungus Penicillim pinophilum and Their Antibacterial Activity Y. Ma et al.
Bicyclic azaphilones with o-orsellinic acid or o-orsellinic acid derivatives		rubiginosin B	Hypoxylon rubiginosum Hypoxylon rutilum	C21H22O8	402.1315	Gao, J.-M., Yang, S.-X., & Qin, J.-C. (2013). Azaphilones: Chemistry and Biology. Chemical Reviews, 113(7), 4755–4811. doi:10.1021/cr300402y
Bicyclic azaphilones with o-orsellinic acid or o-orsellinic acid derivatives		Talaraculone A	Talaromyces aculeatus	C22H24O8	416.1471	Ren, J., Ding, S.-S., Zhu, A., Cao, F., & Zhu, H.-J. (2017). Bioactive Azaphilone Derivatives from the Fungus Talaromyces aculeatus. Journal of Natural Products, 80(8), 2199–2203. doi:10.1021/acs.jnatprod.7b00032
Bicyclic azaphilones with o-orsellinic acid or o-orsellinic acid derivatives		Talaraculone B	Talaromyces aculeatus	C21H20O8	400.1158	Ren, J., Ding, S.-S., Zhu, A., Cao, F., & Zhu, H.-J. (2017). Bioactive Azaphilone Derivatives from the Fungus Talaromyces aculeatus. Journal of Natural Products, 80(8), 2199–2203. doi:10.1021/acs.jnatprod.7b00032
Bicyclic azaphilones with o-orsellinic acid or o-orsellinic acid derivatives		Talaraculone C	Talaromyces aculeatus	C22H24O9	432.1420	Ren, J., Ding, S.-S., Zhu, A., Cao, F., & Zhu, H.-J. (2017). Bioactive Azaphilone Derivatives from the Fungus Talaromyces aculeatus. Journal of Natural Products, 80(8), 2199–2203. doi:10.1021/acs.jnatprod.7b00032
Bicyclic azaphilones with o-orsellinic acid or o-orsellinic acid derivatives		Talaraculone D	Talaromyces aculeatus	C20H20O9	404.11079	Ren, J., Ding, S.-S., Zhu, A., Cao, F., & Zhu, H.-J. (2017). Bioactive Azaphilone Derivatives from the Fungus Talaromyces aculeatus. Journal of Natural Products, 80(8), 2199–2203. doi:10.1021/acs.jnatprod.7b00032
Bicyclic azaphilones with o-orsellinic acid or o-orsellinic acid derivatives		Talaraculone E	Talaromyces aculeatus	C21H24O9	420.1420	Ren, J., Ding, S.-S., Zhu, A., Cao, F., & Zhu, H.-J. (2017). Bioactive Azaphilone Derivatives from the Fungus Talaromyces aculeatus. Journal of Natural Products, 80(8), 2199–2203. doi:10.1021/acs.jnatprod.7b00032
Bicyclic azaphilones with o-orsellinic acid or o-orsellinic acid derivatives		Talaraculone F	Talaromyces aculeatus	C21H20O8	400.1158	Ren, J., Ding, S.-S., Zhu, A., Cao, F., & Zhu, H.-J. (2017). Bioactive Azaphilone Derivatives from the Fungus Talaromyces aculeatus. Journal of Natural Products, 80(8), 2199–2203. doi:10.1021/acs.jnatprod.7b00032
Bicyclic nitrogen azaphilones		(5S)-3,4,5,7-tetramethyl-5,8-dihydroxyl-6(5H)-isoquinolinone (isoquinocitrinin A)	Penicillium sp. H9318	C13H15NO3	233.1052	Gao, J.-M., Yang, S.-X., & Qin, J.-C. (2013). Azaphilones: Chemistry and Biology. Chemical Reviews, 113(7), 4755–4811. doi:10.1021/cr300402y
Bicyclic nitrogen azaphilones with aliphatic side chain		azanigerone D	Aspergillus niger ATCC 1015	C19H23NO6	361.1525	Zabala, A. O., Xu, W., Chooi, Y.-H., & Tang, Y. (2012). Characterization of a Silent Azaphilone Gene Cluster from Aspergillus niger ATCC 1015 Reveals a Hydroxylation-Mediated Pyran-Ring Formation. Chemistry & Biology, 19(8), 1049–1059. doi:10.1016/j.chembiol.2012.07.004
Bicyclic nitrogen azaphilones with aliphatic side chain		Unnamed	Red yeast rice produced by uncharacterize d Monascus spp.	C21H27NO7S	437.1508	Chen W, Feng Y, Molnár I, Chen F. Nature and nurture: confluence of pathway determinism with metabolic and chemical serendipity diversifies Monascus azaphilone pigments. Nat Prod Rep. 17 avr 2019;36(4):561‑72.
Bicyclic nitrogen azaphilones with aliphatic side chain		Unnamed	Red yeast rice produced by uncharacterize d Monascus spp.	C23H31NO7S	465.1821	Chen W, Feng Y, Molnár I, Chen F. Nature and nurture: confluence of pathway determinism with metabolic and chemical serendipity diversifies Monascus azaphilone pigments. Nat Prod Rep. 17 avr 2019;36(4):561‑72.
Bicyclic nitrogen azaphilones with aliphatic side chain		Unnamed	M. ruber	C18H25NO3	303.1834	Chen W, Feng Y, Molnár I, Chen F. Nature and nurture: confluence of pathway determinism with metabolic and chemical serendipity diversifies Monascus azaphilone pigments. Nat Prod Rep. 17 avr 2019;36(4):561‑72.
Bicyclic nitrogen azaphilones with aliphatic side chain		Unnamed	M. ruber	C20H29NO3	331.2147	Chen W, Feng Y, Molnár I, Chen F. Nature and nurture: confluence of pathway determinism with metabolic and chemical serendipity diversifies Monascus azaphilone pigments. Nat Prod Rep. 17 avr 2019;36(4):561‑72.
Bicyclic nitrogen azaphilones with aliphatic side chain		monascopyridine C	Monascus purpureus Monascus kaoliang BCRC 31506	C20H27NO3	329.1991	Gao, J.-M., Yang, S.-X., & Qin, J.-C. (2013). Azaphilones: Chemistry and Biology. Chemical Reviews, 113(7), 4755–4811. doi:10.1021/cr300402y
Bicyclic nitrogen azaphilones with aliphatic side chain		monascopyridine D	Monascus purpureus Monascus kaoliang BCRC 31506	C22H31NO3	357.2304	Gao, J.-M., Yang, S.-X., & Qin, J.-C. (2013). Azaphilones: Chemistry and Biology. Chemical Reviews, 113(7), 4755–4811. doi:10.1021/cr300402y
Bicyclic nitrogen azaphilones with aliphatic side chain		3-((R)-sec-butyl)-7-carboxy-6,8-dihydroxy-2-(2-hydroxyethyl)-4- methylisoquinolinium (fusarimine)	Fusarium sp. LN12 (endophytic)	C17H21NO5	319.1420	Gao, J.-M., Yang, S.-X., & Qin, J.-C. (2013). Azaphilones: Chemistry and Biology. Chemical Reviews, 113(7), 4755–4811. doi:10.1021/cr300402y
Bicyclic nitrogen azaphilones with amino acid residue		red pigment	Monascus ruber van Tieghem	C19H28N2O5	364.1998	Gao, J.-M., Yang, S.-X., & Qin, J.-C. (2013). Azaphilones: Chemistry and Biology. Chemical Reviews, 113(7), 4755–4811. doi:10.1021/cr300402y
Bicyclic nitrogen azaphilones with amino acid residue		Unnamed	M. ruber 102w	C19H28N2O5	364.1998	Chen W, Feng Y, Molnár I, Chen F. Nature and nurture: confluence of pathway determinism with metabolic and chemical serendipity diversifies Monascus azaphilone pigments. Nat Prod Rep. 17 avr 2019;36(4):561‑72.
Bicyclic nitrogen azaphilones with o-orsellinic acid or o-orsellinic acid derivatives		Mitorubrin 1N	Hypoxylon fragiforme	C21H19O6N	381.1212	Svilar, L., Stankov-Jovanovic, V., Lesage, D., Dossmann, H., & Tabet, J.-C. (2012). High-resolution mass spectrometry and hydrogen/deuterium exchange study of mitorubrin azaphilones and nitrogenized analogues. Journal of Mass Spectrometry, 47(8), 969–977. doi:10.1002/jms.3044
Bicyclic nitrogen azaphilones with o-orsellinic acid or o-orsellinic acid derivatives		Mitorubrin 2N	Hypoxylon fragiforme	C21H17O8N	411.0954	Svilar, L., Stankov-Jovanovic, V., Lesage, D., Dossmann, H., & Tabet, J.-C. (2012). High-resolution mass spectrometry and hydrogen/deuterium exchange study of mitorubrin azaphilones and nitrogenized analogues. Journal of Mass Spectrometry, 47(8), 969–977. doi:10.1002/jms.3044
Bicyclic nitrogen azaphilones with o-orsellinic acid or o-orsellinic acid derivatives		Mitorubrin 3N	Hypoxylon fragiforme	C21H19O7N	397.1162	Svilar, L., Stankov-Jovanovic, V., Lesage, D., Dossmann, H., & Tabet, J.-C. (2012). High-resolution mass spectrometry and hydrogen/deuterium exchange study of mitorubrin azaphilones and nitrogenized analogues. Journal of Mass Spectrometry, 47(8), 969–977. doi:10.1002/jms.3044
Bicyclic nitrogen azaphilones with o-orsellinic acid or o-orsellinic acid derivatives		Mitorubrin 4N	Hypoxylon fragiforme	C23H21O8N	439.1267	Svilar, L., Stankov-Jovanovic, V., Lesage, D., Dossmann, H., & Tabet, J.-C. (2012). High-resolution mass spectrometry and hydrogen/deuterium exchange study of mitorubrin azaphilones and nitrogenized analogues. Journal of Mass Spectrometry, 47(8), 969–977. doi:10.1002/jms.3044
Bicyclic spiro-azaphilones		cochliospicin A	Cochliobolus spicifer Nelson D-5	C17H22O6	322.1416	Gao, J.-M., Yang, S.-X., & Qin, J.-C. (2013). Azaphilones: Chemistry and Biology. Chemical Reviews, 113(7), 4755–4811. doi:10.1021/cr300402y
Bicyclic spiro-azaphilones		5-Epi-pestafolide A	Trichocladium sp.	C15H22O5	282.1467	Tran-Cong, N. M., Mándi, A., Kurtán, T., Müller, W. E. G., Kalscheuer, R., Lin, W., … Proksch, P. (2019). Induction of cryptic metabolites of the endophytic fungus Trichocladium sp. through OSMAC and co-cultivation. RSC Advances, 9(47), 27279–27288. doi:10.1039/c9ra05469c
Bicyclic spiro-azaphilones		5-O-Acetyl-epi-pestafolide A	Trichocladium sp.	C17H24O6	324.1573	Tran-Cong, N. M., Mándi, A., Kurtán, T., Müller, W. E. G., Kalscheuer, R., Lin, W., … Proksch, P. (2019). Induction of cryptic metabolites of the endophytic fungus Trichocladium sp. through OSMAC and co-cultivation. RSC Advances, 9(47), 27279–27288. doi:10.1039/c9ra05469c
Bicyclic spiro-azaphilones		decipinin A	Podospora decipiens JS 270 (coprophilous fungus) (Lasiosphaeriaceae)	C31H36O12	600.2207	Gao, J.-M., Yang, S.-X., & Qin, J.-C. (2013). Azaphilones: Chemistry and Biology. Chemical Reviews, 113(7), 4755–4811. doi:10.1021/cr300402y
Bicyclic spiro-azaphilones		daldinin C	Daldinia concentrica (Xylariaceae) Hypoxylon rubiginosum Hypoxylon fuscum	C22H26O9	434.1577	Gao, J.-M., Yang, S.-X., & Qin, J.-C. (2013). Azaphilones: Chemistry and Biology. Chemical Reviews, 113(7), 4755–4811. doi:10.1021/cr300402y
Bicyclic spiro-azaphilones		daldinin D	Penicillium thymicola IBT5891	C21H24O10	436.1369	Gao, J.-M., Yang, S.-X., & Qin, J.-C. (2013). Azaphilones: Chemistry and Biology. Chemical Reviews, 113(7), 4755–4811. doi:10.1021/cr300402y
Bicyclic spiro-azaphilones		daldinin E	Hypoxylon fuscum	C24H28O9	460.1733	Gao, J.-M., Yang, S.-X., & Qin, J.-C. (2013). Azaphilones: Chemistry and Biology. Chemical Reviews, 113(7), 4755–4811. doi:10.1021/cr300402y
Bicyclic spiro-azaphilones		daldinin F	Hypoxylon fuscum	C24H28O9	460.1733	Gao, J.-M., Yang, S.-X., & Qin, J.-C. (2013). Azaphilones: Chemistry and Biology. Chemical Reviews, 113(7), 4755–4811. doi:10.1021/cr300402y
Bicyclic spiro-azaphilones		pestafolide A	Pestalotiopsis foedan L436	C15H22O5	282.1467	Gao, J.-M., Yang, S.-X., & Qin, J.-C. (2013). Azaphilones: Chemistry and Biology. Chemical Reviews, 113(7), 4755–4811. doi:10.1021/cr300402y
Bicyclic spiro-azaphilones		peneciraistin A	Penicillium raistrickii HQ717799	C15H20O5	280.1311	Gao, J.-M., Yang, S.-X., & Qin, J.-C. (2013). Azaphilones: Chemistry and Biology. Chemical Reviews, 113(7), 4755–4811. doi:10.1021/cr300402y
Bicyclic spiro-azaphilones		peneciraistin B	Penicillium raistrickii HQ717799	C15H20O5	280.1311	Gao, J.-M., Yang, S.-X., & Qin, J.-C. (2013). Azaphilones: Chemistry and Biology. Chemical Reviews, 113(7), 4755–4811. doi:10.1021/cr300402y
Bicyclic spiro-azaphilones		peneciraistin C	Penicillium raistrickii HQ717799	C19H26O9	398.1577	Gao, J.-M., Yang, S.-X., & Qin, J.-C. (2013). Azaphilones: Chemistry and Biology. Chemical Reviews, 113(7), 4755–4811. doi:10.1021/cr300402y
Bicyclic spiro-azaphilones		Thielavialide A	Thielavia sp. PA0001	C14H20O5	268.1311	Wijeratne, E. M. K., Espinosa-Artiles, P., Gruener, R., & Gunatilaka, A. A. L. (2014). Thielavialides A–E, Nor-Spiro-azaphilones, and a Bis-spiro-azaphilone from Thielavia sp. PA0001, An Endophytic Fungus Isolated from Aeroponically Grown Physalis alkekengi. Journal of Natural Products, 77(6), 1467–1472. doi:10.1021/np500237h
Bicyclic spiro-azaphilones		Thielavialide B	Thielavia sp. PA0001	C14H20O5	268.1311	Wijeratne, E. M. K., Espinosa-Artiles, P., Gruener, R., & Gunatilaka, A. A. L. (2014). Thielavialides A–E, Nor-Spiro-azaphilones, and a Bis-spiro-azaphilone from Thielavia sp. PA0001, An Endophytic Fungus Isolated from Aeroponically Grown Physalis alkekengi. Journal of Natural Products, 77(6), 1467–1472. doi:10.1021/np500237h
Bicyclic spiro-azaphilones		Thielavialide C	Thielavia sp. PA0001	C14H20O5	268.1311	Wijeratne, E. M. K., Espinosa-Artiles, P., Gruener, R., & Gunatilaka, A. A. L. (2014). Thielavialides A–E, Nor-Spiro-azaphilones, and a Bis-spiro-azaphilone from Thielavia sp. PA0001, An Endophytic Fungus Isolated from Aeroponically Grown Physalis alkekengi. Journal of Natural Products, 77(6), 1467–1472. doi:10.1021/np500237h
Bicyclic spiro-azaphilones		Thielavialide D	Thielavia sp. PA0001	C14H18O5	266.1154	Wijeratne, E. M. K., Espinosa-Artiles, P., Gruener, R., & Gunatilaka, A. A. L. (2014). Thielavialides A–E, Nor-Spiro-azaphilones, and a Bis-spiro-azaphilone from Thielavia sp. PA0001, An Endophytic Fungus Isolated from Aeroponically Grown Physalis alkekengi. Journal of Natural Products, 77(6), 1467–1472. doi:10.1021/np500237h
Bicyclic spiro-azaphilones with o-orsellinic acid or o-orsellinic acid derivatives		Pleosporalone E	Pleosporales sp. CF09-1	C22H26O9	434.1577	Cao, F., Meng, Z.-H., Mu, X., Yue, Y.-F., & Zhu, H.-J. (2019). Absolute Configuration of Bioactive Azaphilones from the Marine-Derived Fungus Pleosporales sp. CF09-1. Journal of Natural Products. doi:10.1021/acs.jnatprod.8b01030
Bicyclic spiro-azaphilones with o-orsellinic acid or o-orsellinic acid derivatives		Pleosporalone F	Pleosporales sp. CF09-1	C22H26O9	434.1577	Cao, F., Meng, Z.-H., Mu, X., Yue, Y.-F., & Zhu, H.-J. (2019). Absolute Configuration of Bioactive Azaphilones from the Marine-Derived Fungus Pleosporales sp. CF09-1. Journal of Natural Products. doi:10.1021/acs.jnatprod.8b01030
Brominated azaphilones with aliphatic side chain		Penicilone G	Penicillium janthinellum HK1‑6	C29H36BrO7	575.16459	Min Chen, Yao-Yao Zheng, Zhi-Qi Chen, Nan-Xing Shen, Li Shen, Feng-Min Zhang, Xiao-Jian Zhou, and Chang-Yun Wang Journal of Natural Products 2019 82 (2), 368-374 DOI:10.1021/acs.jnatprod.8b00930
Brominated azaphilones with aliphatic side chain and aromatic ring		Bromophilone A	Penicillium canescens Strain 4.14.6a	C33H35BrO13	718.1261	Frank, M., Hartmann, R., Plenker, M., Mándi, A., Kurtán, T., Özkaya, F. C., … Proksch, P. (2019). Brominated Azaphilones from the Sponge-Associated Fungus Penicillium canescens Strain 4.14.6a. Journal of Natural Products. doi:10.1021/acs.jnatprod.9b00151
Brominated azaphilones with aliphatic side chain and aromatic ring		Bromophilone B	Penicillium canescens Strain 4.14.6a	C33H35BrO13	718.1261	Frank, M., Hartmann, R., Plenker, M., Mándi, A., Kurtán, T., Özkaya, F. C., … Proksch, P. (2019). Brominated Azaphilones from the Sponge-Associated Fungus Penicillium canescens Strain 4.14.6a. Journal of Natural Products. doi:10.1021/acs.jnatprod.9b00151
Brominated azaphilones with aliphatic side chain and aromatic ring		Penicilone H	Penicillium janthinellum HK1‑6	C29H33BrO6	556.1461	Min Chen, Yao-Yao Zheng, Zhi-Qi Chen, Nan-Xing Shen, Li Shen, Feng-Min Zhang, Xiao-Jian Zhou, and Chang-Yun Wang Journal of Natural Products 2019 82 (2), 368-374 DOI:10.1021/acs.jnatprod.8b00930
Brominated azaphilones with lactone ring		5-bromoochrephilone	Penicillium multicolor FO-2338	C23H25O5Br	460.0885	Gao, J.-M., Yang, S.-X., & Qin, J.-C. (2013). Azaphilones: Chemistry and Biology. Chemical Reviews, 113(7), 4755–4811. doi:10.1021/cr300402y
Clorinated azaphilones with aliphatic chain		Pleosporalone B	Pleosporales sp. CF09-1	C27H29ClO8	516.1551	Cao, F., Meng, Z.-H., Mu, X., Yue, Y.-F., & Zhu, H.-J. (2019). Absolute Configuration of Bioactive Azaphilones from the Marine-Derived Fungus Pleosporales sp. CF09-1. Journal of Natural Products. doi:10.1021/acs.jnatprod.8b01030
Clorinated azaphilones with aliphatic side chain		chaephilone A	Chaetomium globosum	C22H29ClO5	408.1704	Chen, C., Wang, J., Zhu, H., Wang, J., Xue, Y., Wei, G., … Zhang, Y. (2016). Chaephilones A and B, Two New Azaphilone Derivatives Isolated fromChaetomium globosum. Chemistry & Biodiversity, 13(4), 422–426. doi:10.1002/cbdv.201500117
Clorinated azaphilones with aliphatic side chain		chaephilone B	Chaetomium globosum	C23H27ClO7	450.1445	Chen, C., Wang, J., Zhu, H., Wang, J., Xue, Y., Wei, G., … Zhang, Y. (2016). Chaephilones A and B, Two New Azaphilone Derivatives Isolated fromChaetomium globosum. Chemistry & Biodiversity, 13(4), 422–426. doi:10.1002/cbdv.201500117
Clorinated azaphilones with aliphatic side chain		chaetomugilin I	Chaetomium globosum OUPS-T106B-6	C22H27ClO5	406.1547	Gao, J.-M., Yang, S.-X., & Qin, J.-C. (2013). Azaphilones: Chemistry and Biology. Chemical Reviews, 113(7), 4755–4811. doi:10.1021/cr300402y
Clorinated azaphilones with aliphatic side chain		chaetomugilin J	Chaetomium globosum OUPS-T106B-6	C22H27ClO4	390.1598	Gao, J.-M., Yang, S.-X., & Qin, J.-C. (2013). Azaphilones: Chemistry and Biology. Chemical Reviews, 113(7), 4755–4811. doi:10.1021/cr300402y
Clorinated azaphilones with aliphatic side chain		chaetomugilin P	Chaetomium globosum OUPS-T106B-6	C22H27ClO5	406.1547	Gao, J.-M., Yang, S.-X., & Qin, J.-C. (2013). Azaphilones: Chemistry and Biology. Chemical Reviews, 113(7), 4755–4811. doi:10.1021/cr300402y
Clorinated azaphilones with aliphatic side chain		chaetomugilin Q	Chaetomium globosum OUPS-T106B-6	C22H29ClO6	424.1653	Gao, J.-M., Yang, S.-X., & Qin, J.-C. (2013). Azaphilones: Chemistry and Biology. Chemical Reviews, 113(7), 4755–4811. doi:10.1021/cr300402y
Clorinated azaphilones with aliphatic side chain		chaetomugilin R	Chaetomium globosum OUPS-T106B-6	C16H21ClO5	328.1078	Gao, J.-M., Yang, S.-X., & Qin, J.-C. (2013). Azaphilones: Chemistry and Biology. Chemical Reviews, 113(7), 4755–4811. doi:10.1021/cr300402y
Clorinated azaphilones with aliphatic side chain		(11S)-epi-chaetomugilin I	Chaetomium globosum OUPS-T106B-6	C22H27ClO5	406.1547	Gao, J.-M., Yang, S.-X., & Qin, J.-C. (2013). Azaphilones: Chemistry and Biology. Chemical Reviews, 113(7), 4755–4811. doi:10.1021/cr300402y
Clorinated azaphilones with aliphatic side chain		epi-isochromophilone II	Chaetomium cupreum CC3003	C22H27ClO4	390.1598	Gao, J.-M., Yang, S.-X., & Qin, J.-C. (2013). Azaphilones: Chemistry and Biology. Chemical Reviews, 113(7), 4755–4811. doi:10.1021/cr300402y
Clorinated azaphilones with aliphatic side chain		eupenicilazaphilone A	Eupenicillium sp. 6A-9	C19H27O6Cl	386.1496	Gu, B.-B., wu, Y., Tang, J., Jiao, W., Li, L., Sun, F., … Lin, H.-W. (2018). Azaphilone and isocoumarin derivatives from the sponge-derived fungus Eupenicillium sp. 6A-9. Tetrahedron Letters, 59(36), 3345–3348. doi:10.1016/j.tetlet.2018.06.057
Clorinated azaphilones with aliphatic side chain		eupenicilazaphilone B	Eupenicillium sp. 6A-9	C19H27O6Cl	386.1496	Gu, B.-B., wu, Y., Tang, J., Jiao, W., Li, L., Sun, F., … Lin, H.-W. (2018). Azaphilone and isocoumarin derivatives from the sponge-derived fungus Eupenicillium sp. 6A-9. Tetrahedron Letters, 59(36), 3345–3348. doi:10.1016/j.tetlet.2018.06.057
Clorinated azaphilones with aliphatic side chain		eupenicilazaphilone C	Eupenicillium sp. 6A-9	C21H29O7Cl	428.1602	Gu, B.-B., wu, Y., Tang, J., Jiao, W., Li, L., Sun, F., … Lin, H.-W. (2018). Azaphilone and isocoumarin derivatives from the sponge-derived fungus Eupenicillium sp. 6A-9. Tetrahedron Letters, 59(36), 3345–3348. doi:10.1016/j.tetlet.2018.06.057
Clorinated azaphilones with aliphatic side chain		geumsanol F (5-chloro-3-(3,4-dihydroxy-3,5-dimethyl-1-hepten-1-yl)-7,8-dihydro-7,8-dihydroxy-7-methyl-6H-2-benzopyran6-one)	Penicillium sp. KCB11A109	C19H25O6Cl	384.1340	Son, S., Ko, S.-K., Kim, J. W., Lee, J. K., Jang, M., Ryoo, I.-J., … Ahn, J. S. (2016). Structures and biological activities of azaphilones produced by Penicillium sp. KCB11A109 from a ginseng field. Phytochemistry, 122, 154–164. doi:10.1016/j.phytochem.2015.12.008
Clorinated azaphilones with aliphatic side chain		geumsanol G	Penicillium sp. KCB11A109	C19H27O6Cl	386.1496	Son, S., Ko, S.-K., Kim, J. W., Lee, J. K., Jang, M., Ryoo, I.-J., … Ahn, J. S. (2016). Structures and biological activities of azaphilones produced by Penicillium sp. KCB11A109 from a ginseng field. Phytochemistry, 122, 154–164. doi:10.1016/j.phytochem.2015.12.008
Clorinated azaphilones with aliphatic side chain		hypocrellone A	Hypocrella sp.	C21H29O7Cl	428.1602	Guo, Q., Dong, L., Zang, X., Gu, Z., He, X., Yao, L., … Guan, X. (2015). A new azaphilone from the entomopathogenic fungusHypocrellasp. Natural Product Research, 29(21), 2000–2006. doi:10.1080/14786419.2015.1023199
Clorinated azaphilones with aliphatic side chain		FK17-P3	Aspergillus sp. FK17	C13H15O4Cl	270.0659	Gao, J.-M., Yang, S.-X., & Qin, J.-C. (2013). Azaphilones: Chemistry and Biology. Chemical Reviews, 113(7), 4755–4811. doi:10.1021/cr300402y
Clorinated azaphilones with aliphatic side chain		penicilazaphilone C	Penicillium sclerotiorum	C20H29O7Cl	416.1602	Zhou, S., Wang, M., Zhao, H., Huang, Y., Lin, Y., Tan, G., & Chen, S. (2016). Penicilazaphilone C, a new antineoplastic and antibacterial azaphilone from the Marine Fungus Penicillium sclerotiorum. Archives of Pharmacal Research, 39(12), 1621–1627. doi:10.1007/s12272-016-0828-3
Clorinated azaphilones with aliphatic side chain		Penicilazaphilone D	Penicillium sclerotiorum	C14H15ClO5	298.0608	Wang, C.-Y., Hao, J.-D., Ning, X.-Y., Wu, J.-S., Zhao, D.-L., Kong, C.-J., … Wang, C.-Y. (2018). Penicilazaphilones D and E: two new azaphilones from a sponge-derived strain of the fungus Penicillium sclerotiorum. RSC Advances, 8(8), 4348–4353. doi:10.1039/c7ra13327h
Clorinated azaphilones with aliphatic side chain		Penicilazaphilone E	Penicillium sclerotiorum	C19H25ClO6	384.1340	Wang, C.-Y., Hao, J.-D., Ning, X.-Y., Wu, J.-S., Zhao, D.-L., Kong, C.-J., … Wang, C.-Y. (2018). Penicilazaphilones D and E: two new azaphilones from a sponge-derived strain of the fungus Penicillium sclerotiorum. RSC Advances, 8(8), 4348–4353. doi:10.1039/c7ra13327h
Clorinated azaphilones with aliphatic side chain		Penicilone C	Penicillium janthinellum HK1‑6	C29H35ClO7	530.2071	Chen, M., Shen, N.-X., Chen, Z.-Q., Zhang, F.-M., & Chen, Y. (2017). Penicilones A–D, Anti-MRSA Azaphilones from the Marine-Derived Fungus Penicillium janthinellum HK1-6. Journal of Natural Products, 80(4), 1081–1086. doi:10.1021/acs.jnatprod.6b01179
Clorinated azaphilones with aliphatic side chain		Penidioxolane A	Penicilliumsp. KCB12C078	C23H33ClO6	440.1966	Kim, S. M., Son, S., Kim, J. W., Jeon, E. S., Ko, S.-K., Ryoo, I.-J., … Ahn, J. S. (2015). Penidioxolanes A and B, 1,3-Dioxolane Containing Azaphilone Derivatives from Marine-derivedPenicilliumsp. KCB12C078. Natural Product Sciences, 21(4), 231. doi:10.20307/nps.2015.21.4.231
Clorinated azaphilones with aliphatic side chain		Penidioxolane B	Penicilliumsp. KCB12C078	C25H35ClO7	482.2071	Kim, S. M., Son, S., Kim, J. W., Jeon, E. S., Ko, S.-K., Ryoo, I.-J., … Ahn, J. S. (2015). Penidioxolanes A and B, 1,3-Dioxolane Containing Azaphilone Derivatives from Marine-derivedPenicilliumsp. KCB12C078. Natural Product Sciences, 21(4), 231. doi:10.20307/nps.2015.21.4.231
Clorinated azaphilones with aliphatic side chain		Sclerketide B	Penicillium sclerotiorum CHNSCLM-0013	C22H25O5Cl	404.1391	Liu, Z., Qiu, P., Liu, H., Li, J., Shao, C., Yan, T., … She, Z. (2019). Identification of Anti-inflammatory Polyketides from the Coral-Derived Fungus Penicillium sclerotiorin: In vitro Approaches and Molecular-modeling. Bioorganic Chemistry, 102973. doi:10.1016/j.bioorg.2019.102973
Clorinated azaphilones with aliphatic side chain		sclerotiorin (+)-sclerotiorin (+)-(7R,13S)-sclerotiorin	Penicillium sclerotiorum X11853 Penicillium frequentans (mycobionts of the lichen Pyrenula japonica) Penicillium multicolor F1753 192 Penicillium frequentans CFTRI A-24 Penicillium sclerotiorum PSU-A13 (endophyte) Penicillium citreonigrum AF033418 Penicillium sclerotiorum van Beyma Penicillium multicolor FO-2338 Penicillium sp. FO-4164 Cephalotheca faveolata Yaguchi, Nishim., and Udagawa (endophy…	C21H23ClO5	390.1234	Gao, J.-M., Yang, S.-X., & Qin, J.-C. (2013). Azaphilones: Chemistry and Biology. Chemical Reviews, 113(7), 4755–4811. doi:10.1021/cr300402y
Clorinated azaphilones with aliphatic side chain		isochromophilone III	Penicillium multicolor FO-3216	C19H25ClO4	352.1441	Gao, J.-M., Yang, S.-X., & Qin, J.-C. (2013). Azaphilones: Chemistry and Biology. Chemical Reviews, 113(7), 4755–4811. doi:10.1021/cr300402y
Clorinated azaphilones with aliphatic side chain		isochromophilone IV	Penicillium multicolor FO-3216 Penicillium sp. FO-4164 199 Penicillium multicolor F1753	C21H27ClO5	394.1547	Gao, J.-M., Yang, S.-X., & Qin, J.-C. (2013). Azaphilones: Chemistry and Biology. Chemical Reviews, 113(7), 4755–4811. doi:10.1021/cr300402y
Clorinated azaphilones with aliphatic side chain		isochromophilone V	Penicillium multicolor FO-3216	C19H23ClO4	350.1285	Gao, J.-M., Yang, S.-X., & Qin, J.-C. (2013). Azaphilones: Chemistry and Biology. Chemical Reviews, 113(7), 4755–4811. doi:10.1021/cr300402y
Clorinated azaphilones with aliphatic side chain		isochromophilone VII	Penicillium sp. FO-4164	C21H25ClO6	408.1340	Gao, J.-M., Yang, S.-X., & Qin, J.-C. (2013). Azaphilones: Chemistry and Biology. Chemical Reviews, 113(7), 4755–4811. doi:10.1021/cr300402y
Clorinated azaphilones with aliphatic side chain		isochromophilone VIII	Penicillium sp. FO-4164	C21H27ClO5	394.1547	Gao, J.-M., Yang, S.-X., & Qin, J.-C. (2013). Azaphilones: Chemistry and Biology. Chemical Reviews, 113(7), 4755–4811. doi:10.1021/cr300402y
Clorinated azaphilones with aliphatic side chain		(−)-sclerotiorin (7-epi-sclerotiorin)	Penicillium hirayamae Udagawa Penicillium hirayamae NHL 6046 unidentified marine fungus 98F134	C21H23ClO5	390.1234	Gao, J.-M., Yang, S.-X., & Qin, J.-C. (2013). Azaphilones: Chemistry and Biology. Chemical Reviews, 113(7), 4755–4811. doi:10.1021/cr300402y
Clorinated azaphilones with aliphatic side chain		(8R)-7-deacetyl-O8,8-dihydro-7-epi-sclerotiorin (luteusin A)	Talaromyces luteus IFM42239 (Ascomycete) Penicillium sclerotiorum X11853	C19H23ClO4	350.1285	Gao, J.-M., Yang, S.-X., & Qin, J.-C. (2013). Azaphilones: Chemistry and Biology. Chemical Reviews, 113(7), 4755–4811. doi:10.1021/cr300402y
Clorinated azaphilones with aliphatic side chain		luteusin B	Talaromyces luteus IFM42239	C19H23ClO4	350.1285	Gao, J.-M., Yang, S.-X., & Qin, J.-C. (2013). Azaphilones: Chemistry and Biology. Chemical Reviews, 113(7), 4755–4811. doi:10.1021/cr300402y
Clorinated azaphilones with aliphatic side chain		helicusin A	Talaromyces helius IFM 42241	C25H27ClO7	474.1445	Gao, J.-M., Yang, S.-X., & Qin, J.-C. (2013). Azaphilones: Chemistry and Biology. Chemical Reviews, 113(7), 4755–4811. doi:10.1021/cr300402y
Clorinated azaphilones with aliphatic side chain		helicusin B	Talaromyces helius IFM 42241	C25H27ClO7	474.1445	Gao, J.-M., Yang, S.-X., & Qin, J.-C. (2013). Azaphilones: Chemistry and Biology. Chemical Reviews, 113(7), 4755–4811. doi:10.1021/cr300402y
Clorinated azaphilones with aliphatic side chain		helicusin C	Talaromyces helius IFM 42241	C25H27ClO7	474.1445	Gao, J.-M., Yang, S.-X., & Qin, J.-C. (2013). Azaphilones: Chemistry and Biology. Chemical Reviews, 113(7), 4755–4811. doi:10.1021/cr300402y
Clorinated azaphilones with aliphatic side chain		helicusin D	Talaromyces helius IFM 42241	C25H27ClO7	474.1445	Gao, J.-M., Yang, S.-X., & Qin, J.-C. (2013). Azaphilones: Chemistry and Biology. Chemical Reviews, 113(7), 4755–4811. doi:10.1021/cr300402y
Clorinated azaphilones with aliphatic side chain		(8S,8α-R)-7-deacetyl-1,O8,8,8a-tetrahydro-7-epi-sclerotiorin	Penicillium sclerotiorum X11853	C19H25O4Cl	352.1441	Gao, J.-M., Yang, S.-X., & Qin, J.-C. (2013). Azaphilones: Chemistry and Biology. Chemical Reviews, 113(7), 4755–4811. doi:10.1021/cr300402y
Clorinated azaphilones with aliphatic side chain		RP-1551-7	Penicillium sp. SPC-21609	C19H23ClO4	350.1285	Gao, J.-M., Yang, S.-X., & Qin, J.-C. (2013). Azaphilones: Chemistry and Biology. Chemical Reviews, 113(7), 4755–4811. doi:10.1021/cr300402y
Clorinated azaphilones with aliphatic side chain		RP-1551-M2	Penicillium sp. SPC-21609	C19H25ClO4	352.1441	Gao, J.-M., Yang, S.-X., & Qin, J.-C. (2013). Azaphilones: Chemistry and Biology. Chemical Reviews, 113(7), 4755–4811. doi:10.1021/cr300402y
Clorinated azaphilones with aliphatic side chain		RP-1551-2	Penicillium sp. SPC-21609	C24H31ClO5	434.1860	Gao, J.-M., Yang, S.-X., & Qin, J.-C. (2013). Azaphilones: Chemistry and Biology. Chemical Reviews, 113(7), 4755–4811. doi:10.1021/cr300402y
Clorinated azaphilones with aliphatic side chain		isochromophilone II	Penicillium multicolor FO-2338	C22H27ClO4	390.1598	Gao, J.-M., Yang, S.-X., & Qin, J.-C. (2013). Azaphilones: Chemistry and Biology. Chemical Reviews, 113(7), 4755–4811. doi:10.1021/cr300402y
Clorinated azaphilones with aliphatic side chain		epi-isochromophilone III	Penicillium multicolor CM01	C20H27ClO4	366.1598	Hemtasin, C., Kanokmedhakul, S., Moosophon, P., Soytong, K., & Kanokmedhakul, K. (2016). Bioactive azaphilones from the fungus Penicillium multicolor CM01. Phytochemistry Letters, 16, 56–60. doi:10.1016/j.phytol.2016.03.004
Clorinated azaphilones with aliphatic side chain		Unnamed	Penicillium sp. KCB11A109	C21H29O7Cl	428.1602	Son, S., Ko, S.-K., Kim, J. W., Lee, J. K., Jang, M., Ryoo, I.-J., … Ahn, J. S. (2016). Structures and biological activities of azaphilones produced by Penicillium sp. KCB11A109 from a ginseng field. Phytochemistry, 122, 154–164. doi:10.1016/j.phytochem.2015.12.008
Clorinated azaphilones with aliphatic side chain		Unnamed	Penicillium sp. KCB11A109	C19H27O6Cl	386.1496	Son, S., Ko, S.-K., Kim, J. W., Lee, J. K., Jang, M., Ryoo, I.-J., … Ahn, J. S. (2016). Structures and biological activities of azaphilones produced by Penicillium sp. KCB11A109 from a ginseng field. Phytochemistry, 122, 154–164. doi:10.1016/j.phytochem.2015.12.008
Clorinated azaphilones with aliphatic side chain and aromatic ring		Penicilone D	Penicillium janthinellum HK1‑6	C29H33ClO6	512.1966	Chen, M., Shen, N.-X., Chen, Z.-Q., Zhang, F.-M., & Chen, Y. (2017). Penicilones A–D, Anti-MRSA Azaphilones from the Marine-Derived Fungus Penicillium janthinellum HK1-6. Journal of Natural Products, 80(4), 1081–1086. doi:10.1021/acs.jnatprod.6b01179
Clorinated azaphilones with aromatic ring		Penicilone F	Penicillium janthinellum HK1‑6	C17H13ClO5	332.0452	Chen, M., Shen, N.-X., Chen, Z.-Q., Zhang, F.-M., & Chen, Y. (2017). Penicilones A–D, Anti-MRSA Azaphilones from the Marine-Derived Fungus Penicillium janthinellum HK1-6. Journal of Natural Products, 80(4), 1081–1086. doi:10.1021/acs.jnatprod.6b01179
Clorinated azaphilones with lactone ring		chaetoviridin A	Chaetomium globosum var. flavo-viridae TRTC 66.631a (Chaetomiaceae) Chaetomium cochliodes VTh01 Chaetomium cochliodes CTh05	C23H25ClO6	432.1340	Gao, J.-M., Yang, S.-X., & Qin, J.-C. (2013). Azaphilones: Chemistry and Biology. Chemical Reviews, 113(7), 4755–4811. doi:10.1021/cr300402y
Clorinated azaphilones with lactone ring		chaetoviridin C	Chaetomium globosum var. flavo-viridae Chaetomium globosum OUPS-T106B-6	C23H27ClO6	434.1496	Gao, J.-M., Yang, S.-X., & Qin, J.-C. (2013). Azaphilones: Chemistry and Biology. Chemical Reviews, 113(7), 4755–4811. doi:10.1021/cr300402y
Clorinated azaphilones with lactone ring		11-epi-chaetoviridin A	Chaetomium sp.	C23H25ClO6	432.1340	Makrerougras, M.; Coffinier, R.; Oger, S.; Chevalier, A.; Sabot, C.; Franck, X. Total Synthesis and Structural Revision of Chaetoviridins A. Org. Lett. 2017, 19 (15), 4146–4149. https://doi.org/10.1021/acs.orglett.7b02053.
Clorinated azaphilones with lactone ring		chaetoviridine E	Chaetomium cochliodes CTh05	C23H23ClO5	414.1234	Gao, J.-M., Yang, S.-X., & Qin, J.-C. (2013). Azaphilones: Chemistry and Biology. Chemical Reviews, 113(7), 4755–4811. doi:10.1021/cr300402y
Clorinated azaphilones with lactone ring		chaetoviridine F	Chaetomium cochliodes CTh05	C23H25ClO5	416.1391	Gao, J.-M., Yang, S.-X., & Qin, J.-C. (2013). Azaphilones: Chemistry and Biology. Chemical Reviews, 113(7), 4755–4811. doi:10.1021/cr300402y
Clorinated azaphilones with lactone ring		chaetoviridine G chaetomugilin O	Chaetomium globosum (OUPS-T106B-6)	C23H25ClO5	416.1391	W. S. Borges, G. Mancilla, D. O. Guimarães, R. Durán-Patrón, I. G. Collado and M. T. Pupo, J. Nat. Prod., 2011, 74, 1182–1187. Y. Muroga, T. Yamada, A. Numata and R. Tanaka, Tetrahedron, 2009, 65, 7580–7586.
Clorinated azaphilones with lactone ring	revised structure	epi-chaetoviridin A (4′-epi-chaetoviridin A)	Chaetomium cochliodes CTh05 Chaetomium globosum	C23H25ClO6	432.1340	Makrerougras, M.; Coffinier, R.; Oger, S.; Chevalier, A.; Sabot, C.; Franck, X. Total Synthesis and Structural Revision of Chaetoviridins A. Org. Lett. 2017, 19 (15), 4146–4149. https://doi.org/10.1021/acs.orglett.7b02053.
Clorinated azaphilones with lactone ring		chaetomugilin S	Chaetomium elatum no. 89-1-3-1 (lichen fungus)	C23H29ClO5	420.1704	Chen, Guo-Dong & Li, Yan-Jun & Gao, Hao & Chen, Ying & Li, Xiao-Xia & Li, Jia & Guo, Liangdong & Cen, Ying-Zhou & Yao, Xin-Sheng. (2012). New Azaphilones and Chlorinated Phenolic Glycosides from Chaetomium elatum with Caspase-3 Inhibitory Activity. Planta medica. 78. 1683-9. 10.1055/s-0032-1315211.
Clorinated azaphilones with lactone ring	Renamed structure	7,4',5′-tris-epi-chaetoviridin A	Chaetomium elatum no. 89-1-3-1 (lichen fungus)	C23H25ClO6	432.1340	Makrerougras, M.; Coffinier, R.; Oger, S.; Chevalier, A.; Sabot, C.; Franck, X. Total Synthesis and Structural Revision of Chaetoviridins A. Org. Lett. 2017, 19 (15), 4146–4149. https://doi.org/10.1021/acs.orglett.7b02053.
Clorinated azaphilones with lactone ring		7-epi-chaetoviridin E	Chaetomium elatum no. 89-1-3-1 (lichen fungus)	C23H23ClO5	414.1234	Gao, J.-M., Yang, S.-X., & Qin, J.-C. (2013). Azaphilones: Chemistry and Biology. Chemical Reviews, 113(7), 4755–4811. doi:10.1021/cr300402y
Clorinated azaphilones with lactone ring		chaetomugilin M 12β-hydroxychaetoviridin C	Chaetomium globosum OUPS-T106B-6	C23H27ClO7	450.1445	Gao, J.-M., Yang, S.-X., & Qin, J.-C. (2013). Azaphilones: Chemistry and Biology. Chemical Reviews, 113(7), 4755–4811. doi:10.1021/cr300402y
Clorinated azaphilones with lactone ring		chaetomugilin N	Chaetomium globosum OUPS-T106B-6	C23H25ClO6	432.1340	Gao, J.-M., Yang, S.-X., & Qin, J.-C. (2013). Azaphilones: Chemistry and Biology. Chemical Reviews, 113(7), 4755–4811. doi:10.1021/cr300402y
Clorinated azaphilones with lactone ring		isochromophilone A	Diaporthe sp. SCSIO 41011	C23H27ClO5	418.1547	Luo, X., Lin, X., Tao, H., Wang, J., Li, J., Yang, B., … Liu, Y. (2018). Isochromophilones A–F, Cytotoxic Chloroazaphilones from the Marine Mangrove Endophytic Fungus Diaporthe sp. SCSIO 41011. Journal of Natural Products, 81(4), 934–941. doi:10.1021/acs.jnatprod.7b01053
Clorinated azaphilones with lactone ring		isochromophilone B	Diaporthe sp. SCSIO 41011	C24H29ClO5	432.1704	Luo, X., Lin, X., Tao, H., Wang, J., Li, J., Yang, B., … Liu, Y. (2018). Isochromophilones A–F, Cytotoxic Chloroazaphilones from the Marine Mangrove Endophytic Fungus Diaporthe sp. SCSIO 41011. Journal of Natural Products, 81(4), 934–941. doi:10.1021/acs.jnatprod.7b01053
Clorinated azaphilones with lactone ring		isochromophilone E	Diaporthe sp. SCSIO 41011	C25H29ClO6	460.1653	Luo, X., Lin, X., Tao, H., Wang, J., Li, J., Yang, B., … Liu, Y. (2018). Isochromophilones A–F, Cytotoxic Chloroazaphilones from the Marine Mangrove Endophytic Fungus Diaporthe sp. SCSIO 41011. Journal of Natural Products, 81(4), 934–941. doi:10.1021/acs.jnatprod.7b01053
Clorinated azaphilones with lactone ring		isochromophilone F	Diaporthe sp. SCSIO 41011	C23H25ClO7	448.1289	Luo, X., Lin, X., Tao, H., Wang, J., Li, J., Yang, B., … Liu, Y. (2018). Isochromophilones A–F, Cytotoxic Chloroazaphilones from the Marine Mangrove Endophytic Fungus Diaporthe sp. SCSIO 41011. Journal of Natural Products, 81(4), 934–941. doi:10.1021/acs.jnatprod.7b01053
Clorinated azaphilones with lactone ring		4′-epi-chaetoviridin F	Chaetomium globosum	C23H25ClO5	416.1391	Gao, J.-M., Yang, S.-X., & Qin, J.-C. (2013). Azaphilones: Chemistry and Biology. Chemical Reviews, 113(7), 4755–4811. doi:10.1021/cr300402y
Clorinated azaphilones with lactone ring		rubrorotiorin (7-epi-5-chloroisorotiorin, 5-chloroisorotiorin)	Penicillium hirayamae Udagawa Penicillium hirayamae Van Beyma Penicillium multicolor FO-2338 Penicillium sp. FO-4164 Penicillium sclerotiorum X11853 Chaetomium cupreum CC3003	C23H23O5Cl	414.1234	Gao, J.-M., Yang, S.-X., & Qin, J.-C. (2013). Azaphilones: Chemistry and Biology. Chemical Reviews, 113(7), 4755–4811. doi:10.1021/cr300402y
Clorinated azaphilones with lactone ring		isochromophilone I	Penicillium multicolor FO-2338	C23H25O5Cl	416.1391	Gao, J.-M., Yang, S.-X., & Qin, J.-C. (2013). Azaphilones: Chemistry and Biology. Chemical Reviews, 113(7), 4755–4811. doi:10.1021/cr300402y
Clorinated azaphilones with lactone ring		RP-1551-3	Penicillium sp. SPC-21609	C25H27O5Cl	442.1547	Gao, J.-M., Yang, S.-X., & Qin, J.-C. (2013). Azaphilones: Chemistry and Biology. Chemical Reviews, 113(7), 4755–4811. doi:10.1021/cr300402y
Clorinated azaphilones with lactone ring		RP-1551-4	Penicillium sp. SPC-21609	C25H29O6Cl	460.1653	Gao, J.-M., Yang, S.-X., & Qin, J.-C. (2013). Azaphilones: Chemistry and Biology. Chemical Reviews, 113(7), 4755–4811. doi:10.1021/cr300402y
Clorinated azaphilones with lactone ring		luteusin E	Talaromyces luteus	C25H27O6Cl	458.1496	Gao, J.-M., Yang, S.-X., & Qin, J.-C. (2013). Azaphilones: Chemistry and Biology. Chemical Reviews, 113(7), 4755–4811. doi:10.1021/cr300402y
Clorinated nitrogen azaphilone dimer		penazaphilone G	Penicillium sclerotiorum cib-411	C46H54N2O8Cl2	832.3257	Azaphilone Alkaloids with Anti-inflammatory Activity from Fungus Penicillium sclerotiorum cib-411 Jialin Tang, Zongyuan Zhou, tao yang, Can Yao, linwei wu, and Guo-You Li J. Agric. Food Chem., Just Accepted Manuscript • DOI: 10.1021/acs.jafc.8b05628 • Publication Date (Web): 31 Jan 2019
Clorinated nitrogen azaphilone with aliphatic side chain		penazaphilone A	Penicillium sclerotiorum cib-411	C27H34NO6Cl	503.2075	Azaphilone Alkaloids with Anti-inflammatory Activity from Fungus Penicillium sclerotiorum cib-411 Jialin Tang, Zongyuan Zhou, tao yang, Can Yao, linwei wu, and Guo-You Li J. Agric. Food Chem., Just Accepted Manuscript • DOI: 10.1021/acs.jafc.8b05628 • Publication Date (Web): 31 Jan 2019
Clorinated nitrogen azaphilone with aliphatic side chain		penazaphilone B	Penicillium sclerotiorum cib-411	C28H36NO6Cl	517.2231	Azaphilone Alkaloids with Anti-inflammatory Activity from Fungus Penicillium sclerotiorum cib-411 Jialin Tang, Zongyuan Zhou, tao yang, Can Yao, linwei wu, and Guo-You Li J. Agric. Food Chem., Just Accepted Manuscript • DOI: 10.1021/acs.jafc.8b05628 • Publication Date (Web): 31 Jan 2019
Clorinated nitrogen azaphilone with aliphatic side chain		penazaphilone C	Penicillium sclerotiorum cib-411	C23H28NO6Cl	449.1605	Azaphilone Alkaloids with Anti-inflammatory Activity from Fungus Penicillium sclerotiorum cib-411 Jialin Tang, Zongyuan Zhou, tao yang, Can Yao, linwei wu, and Guo-You Li J. Agric. Food Chem., Just Accepted Manuscript • DOI: 10.1021/acs.jafc.8b05628 • Publication Date (Web): 31 Jan 2019
Clorinated nitrogen azaphilone with aliphatic side chain		penazaphilone D	Penicillium sclerotiorum cib-411	C25H31N2O5Cl	474.1921	Azaphilone Alkaloids with Anti-inflammatory Activity from Fungus Penicillium sclerotiorum cib-411 Jialin Tang, Zongyuan Zhou, tao yang, Can Yao, linwei wu, and Guo-You Li J. Agric. Food Chem., Just Accepted Manuscript • DOI: 10.1021/acs.jafc.8b05628 • Publication Date (Web): 31 Jan 2019
Clorinated nitrogen azaphilone with aliphatic side chain		penazaphilone E	Penicillium sclerotiorum cib-411	C21H24NO4Cl	389.1394	Azaphilone Alkaloids with Anti-inflammatory Activity from Fungus Penicillium sclerotiorum cib-411 Jialin Tang, Zongyuan Zhou, tao yang, Can Yao, linwei wu, and Guo-You Li J. Agric. Food Chem., Just Accepted Manuscript • DOI: 10.1021/acs.jafc.8b05628 • Publication Date (Web): 31 Jan 2019
Clorinated nitrogen azaphilone with lactone ring		4'-epi-N-2-hydroxyethyl-azachaetoviridin A CAUTION : structure of 4'-epi-chaetoviridin A as been revised recently (Org. Lett. 2017, 19 (15), 4146–4149.)	Chaetomium globosum	C25H30NO6Cl	475.1762	McMullin, D. R., Sumarah, M. W., Blackwell, B. A., & Miller, J. D. (2013). New azaphilones from Chaetomium globosum isolated from the built environment. Tetrahedron Letters, 54(6), 568–572. doi:10.1016/j.tetlet.2012.11.084
Clorinated nitrogen azaphilone with lactone ring		chaetomugilide A	Chaetomium globosum TY1	C27H30ClO6N	499.1762	Li, X., Tian, Y., Yang, S., Zhang, Y., & Qin, J. (2013). Cytotoxic azaphilone alkaloids from Chaetomium globosum TY1. Bioorganic & Medicinal Chemistry Letters, 23(10), 2945–2947. doi:10.1016/j.bmcl.2013.03.044
Clorinated nitrogen azaphilone with lactone ring		chaetomugilide B	Chaetomium globosum TY1	C25H28ClO5N	457.1656	Li, X., Tian, Y., Yang, S., Zhang, Y., & Qin, J. (2013). Cytotoxic azaphilone alkaloids from Chaetomium globosum TY1. Bioorganic & Medicinal Chemistry Letters, 23(10), 2945–2947. doi:10.1016/j.bmcl.2013.03.044
Clorinated nitrogen azaphilone with lactone ring		chaetomugilide C	Chaetomium globosum TY1	C25H30ClO6N	475.1762	Li, X., Tian, Y., Yang, S., Zhang, Y., & Qin, J. (2013). Cytotoxic azaphilone alkaloids from Chaetomium globosum TY1. Bioorganic & Medicinal Chemistry Letters, 23(10), 2945–2947. doi:10.1016/j.bmcl.2013.03.044
Clorinated nitrogen azaphilone with lactone ring		chaetoviridide A	Chaetomium sp. strain NA-S01-R1	C30H31N2O7Cl	566.1820	Wang, W., Liao, Y., Chen, R., Hou, Y., Ke, W., Zhang, B., Gao, M., Shao, Z., Chen, J., & Li, F. (2018). Chlorinated Azaphilone Pigments with Antimicrobial and Cytotoxic Activities Isolated from the Deep Sea Derived Fungus Chaetomium sp. NA-S01-R1. Marine drugs, 16(2), 61. https://doi.org/10.3390/md16020061
Clorinated nitrogen azaphilone with lactone ring		chaetoviridide B	Chaetomium sp. strain NA-S01-R1	C27H34NO7Cl	519.2024	Wang, W., Liao, Y., Chen, R., Hou, Y., Ke, W., Zhang, B., Gao, M., Shao, Z., Chen, J., & Li, F. (2018). Chlorinated Azaphilone Pigments with Antimicrobial and Cytotoxic Activities Isolated from the Deep Sea Derived Fungus Chaetomium sp. NA-S01-R1. Marine drugs, 16(2), 61. https://doi.org/10.3390/md16020061
Clorinated nitrogen azaphilone with lactone ring		chaetoviridide C	Chaetomium sp. strain NA-S01-R1	C25H30NO6Cl	475.1762	Wang, W., Liao, Y., Chen, R., Hou, Y., Ke, W., Zhang, B., Gao, M., Shao, Z., Chen, J., & Li, F. (2018). Chlorinated Azaphilone Pigments with Antimicrobial and Cytotoxic Activities Isolated from the Deep Sea Derived Fungus Chaetomium sp. NA-S01-R1. Marine drugs, 16(2), 61. https://doi.org/10.3390/md16020061
Clorinated nitrogen azaphilones with aliphatic side chain		isochromophilone XIII	Chaetomium globosum	C18H22NO4Cl	351.1237	McMullin, D. R., Sumarah, M. W., Blackwell, B. A., & Miller, J. D. (2013). New azaphilones from Chaetomium globosum isolated from the built environment. Tetrahedron Letters, 54(6), 568–572. doi:10.1016/j.tetlet.2012.11.084
Clorinated nitrogen azaphilones with aliphatic side chain		penazaphilone F	Penicillium sclerotiorum cib-411	C26H32NO6Cl	489.1918	Azaphilone Alkaloids with Anti-inflammatory Activity from Fungus Penicillium sclerotiorum cib-411 Jialin Tang, Zongyuan Zhou, tao yang, Can Yao, linwei wu, and Guo-You Li J. Agric. Food Chem., Just Accepted Manuscript • DOI: 10.1021/acs.jafc.8b05628 • Publication Date (Web): 31 Jan 2019
Clorinated nitrogen azaphilones with aliphatic side chain		penazaphilone H	Penicillium sclerotiorum cib-411	C23H28NO5Cl	433.1656	Azaphilone Alkaloids with Anti-inflammatory Activity from Fungus Penicillium sclerotiorum cib-411 Jialin Tang, Zongyuan Zhou, tao yang, Can Yao, linwei wu, and Guo-You Li J. Agric. Food Chem., Just Accepted Manuscript • DOI: 10.1021/acs.jafc.8b05628 • Publication Date (Web): 31 Jan 2019
Clorinated nitrogen azaphilones with aliphatic side chain		penazaphilone I	Penicillium sclerotiorum cib-411	C25H30NO6Cl	475.1762	Azaphilone Alkaloids with Anti-inflammatory Activity from Fungus Penicillium sclerotiorum cib-411 Jialin Tang, Zongyuan Zhou, tao yang, Can Yao, linwei wu, and Guo-You Li J. Agric. Food Chem., Just Accepted Manuscript • DOI: 10.1021/acs.jafc.8b05628 • Publication Date (Web): 31 Jan 2019
Clorinated nitrogen azaphilones with aliphatic side chain		Peniazaphilone C	Penicillium sp. ZJ-27	C23H28NO5Cl	433.1656	Zhang, L., Long, Y., Lei, X., Xu, J., Huang, Z., She, Z., … Liu, L. (2016). Azaphilones isolated from an alga-derived fungus Penicillium sp. ZJ-27. Phytochemistry Letters, 18, 180–186. doi:10.1016/j.phytol.2016.10.010
Clorinated nitrogen azaphilones with aliphatic side chain		Peniazaphilone D	Penicillium sp. ZJ-27	C22H28NO4Cl	405.1707	Zhang, L., Long, Y., Lei, X., Xu, J., Huang, Z., She, Z., … Liu, L. (2016). Azaphilones isolated from an alga-derived fungus Penicillium sp. ZJ-27. Phytochemistry Letters, 18, 180–186. doi:10.1016/j.phytol.2016.10.010
Clorinated nitrogen azaphilones with aliphatic side chain		(+)-isochromophilone VI	Penicillium multicolor FO-3216 Penicillium sp. MINAP9902 Penicillium sclerotiorum van Beyma Diaporthe sp. IFB-3lp-10 (endophytic)	C23H28ClNO5	433.1656	Gao, J.-M., Yang, S.-X., & Qin, J.-C. (2013). Azaphilones: Chemistry and Biology. Chemical Reviews, 113(7), 4755–4811. doi:10.1021/cr300402y
Clorinated nitrogen azaphilones with aliphatic side chain		8-O-methylsclerotiorinamine	Penicillium multicolor	C22H26ClNO4	403.1550	Gao, J.-M., Yang, S.-X., & Qin, J.-C. (2013). Azaphilones: Chemistry and Biology. Chemical Reviews, 113(7), 4755–4811. doi:10.1021/cr300402y
Clorinated nitrogen azaphilones with aliphatic side chain		isochromophilone IX	Penicillium sp. MINAP9902	C25H30ClNO6	475.1762	Gao, J.-M., Yang, S.-X., & Qin, J.-C. (2013). Azaphilones: Chemistry and Biology. Chemical Reviews, 113(7), 4755–4811. doi:10.1021/cr300402y
Clorinated nitrogen azaphilones with aliphatic side chain		sclerotioramine	Penicillium citreonigrum Diaporthe sp. IFB-3lp-10 (endophytic)	C21H24ClNO4	389.1394	Gao, J.-M., Yang, S.-X., & Qin, J.-C. (2013). Azaphilones: Chemistry and Biology. Chemical Reviews, 113(7), 4755–4811. doi:10.1021/cr300402y
Clorinated nitrogen azaphilones with aliphatic side chain		Sclerketide C	Penicillium sclerotiorum CHNSCLM-0013	C26H32O6NCl	489.1918	Liu, Z., Qiu, P., Liu, H., Li, J., Shao, C., Yan, T., … She, Z. (2019). Identification of Anti-inflammatory Polyketides from the Coral-Derived Fungus Penicillium sclerotiorin: In vitro Approaches and Molecular-modeling. Bioorganic Chemistry, 102973. doi:10.1016/j.bioorg.2019.102973
Clorinated nitrogen azaphilones with aliphatic side chain		sclerotiorin D	Penicillium sclerotiorum OUCMDZ-3839	C26H32O6NCl	489.1918	Azaphilones from the Marine Sponge-Derived Fungus Penicillium sclerotiorum OUCMDZ-3839 Qian Jia et al. doi: 10.3390/md17050260
Clorinated nitrogen azaphilones with aliphatic side chain and aromatic ring		isochromophilone X	Diaporthe sp. IFB-3lp-10 (endophytic)	C29H32ClNO4	493.2020	Gao, J.-M., Yang, S.-X., & Qin, J.-C. (2013). Azaphilones: Chemistry and Biology. Chemical Reviews, 113(7), 4755–4811. doi:10.1021/cr300402y
Clorinated nitrogen azaphilones with aliphatic side chain and aromatic ring		isochromophilone XI	Diaporthe sp. IFB-3lp-10 (endophytic)	C27H30ClNO3	451.1914	Gao, J.-M., Yang, S.-X., & Qin, J.-C. (2013). Azaphilones: Chemistry and Biology. Chemical Reviews, 113(7), 4755–4811. doi:10.1021/cr300402y
Clorinated nitrogen azaphilones with aliphatic side chain and aromatic ring		isochromophilone XII	Diaporthe sp. IFB-3lp-10 (endophytic)	C31H33N2ClO4	532.2129	Gao, J.-M., Yang, S.-X., & Qin, J.-C. (2013). Azaphilones: Chemistry and Biology. Chemical Reviews, 113(7), 4755–4811. doi:10.1021/cr300402y
Clorinated nitrogen azaphilones with lactone ring		N-2-butyric-azochaetoviridin E	Chaetomium globosum	C27H30NO6Cl	499.1762	McMullin, D. R., Sumarah, M. W., Blackwell, B. A., & Miller, J. D. (2013). New azaphilones from Chaetomium globosum isolated from the built environment. Tetrahedron Letters, 54(6), 568–572. doi:10.1016/j.tetlet.2012.11.084
Clorinated nitrogen azaphilones with lactone ring		N-glutarylchaetoviridin A CAUTION : structure of chaetoviridin A as been revised recently (Org. Lett. 2017, 19 (15), 4146–4149.)	Chaetomium globosum HDN151398	C31H38O9NCl	603.2235	New Glutamine-Containing Azaphilone Alkaloids from Deep-Sea-Derived Fungus Chaetomium globosum HDN151398 Chunxiao Sun et al. doi: 10.3390/md17050253
Clorinated nitrogen azaphilones with lactone ring		N-glutarylchaetoviridin B	Chaetomium globosum HDN151398	C28H30O8NCl	543.1660	New Glutamine-Containing Azaphilone Alkaloids from Deep-Sea-Derived Fungus Chaetomium globosum HDN151398 Chunxiao Sun et al. doi: 10.3390/md17050253
Clorinated nitrogen azaphilones with lactone ring		N-glutarylchaetoviridin C	Chaetomium globosum HDN151398	C30H34O8NCl	571.1973	New Glutamine-Containing Azaphilone Alkaloids from Deep-Sea-Derived Fungus Chaetomium globosum HDN151398 Chunxiao Sun et al. doi: 10.3390/md17050253
Clorinated nitrogen azaphilones with lactone ring		Compound 1 (no named)	Chaetomium globosum MP4-S01‑7	C33H42ClNO5	567.2752	Weiyi Wang, Jing Yang, Yan-Yan Liao, Gang Cheng, Jing Chen, Xiang-Dong Cheng, Jiang-Jiang Qin, and Zongze Shao. Journal of Natural Products 2020 83 (4), 1157-1166 DOI:10.1021/acs.jnatprod.9b01165
Clorinated nitrogen azaphilones with lactone ring		Compound 2 (no named)	Chaetomium globosum MP4-S01‑7	C33H42ClNO5	567.2752	Weiyi Wang, Jing Yang, Yan-Yan Liao, Gang Cheng, Jing Chen, Xiang-Dong Cheng, Jiang-Jiang Qin, and Zongze Shao. Journal of Natural Products 2020 83 (4), 1157-1166 DOI:10.1021/acs.jnatprod.9b01165
Clorinated nitrogen azaphilones with lactone ring		Compound 3 (no named)	Chaetomium globosum MP4-S01‑7	C28H34ClNO5	499.2126	Weiyi Wang, Jing Yang, Yan-Yan Liao, Gang Cheng, Jing Chen, Xiang-Dong Cheng, Jiang-Jiang Qin, and Zongze Shao. Journal of Natural Products 2020 83 (4), 1157-1166 DOI:10.1021/acs.jnatprod.9b01165
Clorinated nitrogen azaphilones with lactone ring		Compound 4 (no named)	Chaetomium globosum MP4-S01‑7	C28H34ClNO5	499.2126	Weiyi Wang, Jing Yang, Yan-Yan Liao, Gang Cheng, Jing Chen, Xiang-Dong Cheng, Jiang-Jiang Qin, and Zongze Shao. Journal of Natural Products 2020 83 (4), 1157-1166 DOI:10.1021/acs.jnatprod.9b01165
Clorinated nitrogen azaphilones with lactone ring		Compound 5 (no named)	Chaetomium globosum MP4-S01‑7	C33H40ClNO4	549.2646	Weiyi Wang, Jing Yang, Yan-Yan Liao, Gang Cheng, Jing Chen, Xiang-Dong Cheng, Jiang-Jiang Qin, and Zongze Shao. Journal of Natural Products 2020 83 (4), 1157-1166 DOI:10.1021/acs.jnatprod.9b01165
Clorinated nitrogen azaphilones with lactone ring		Compound 6 (no named)	Chaetomium globosum MP4-S01‑7	C28H32ClNO4	481.2020	Weiyi Wang, Jing Yang, Yan-Yan Liao, Gang Cheng, Jing Chen, Xiang-Dong Cheng, Jiang-Jiang Qin, and Zongze Shao. Journal of Natural Products 2020 83 (4), 1157-1166 DOI:10.1021/acs.jnatprod.9b01165
Clorinated nitrogen azaphilones with lactone ring		Compound 7 (no named)	Chaetomium globosum MP4-S01‑7	C31H38ClNO4	523.2489	Weiyi Wang, Jing Yang, Yan-Yan Liao, Gang Cheng, Jing Chen, Xiang-Dong Cheng, Jiang-Jiang Qin, and Zongze Shao. Journal of Natural Products 2020 83 (4), 1157-1166 DOI:10.1021/acs.jnatprod.9b01165
Clorinated nitrogen azaphilones with lactone ring		Compound 8 (no named)	Chaetomium globosum MP4-S01‑7	C26H30ClNO4	455.1863	Weiyi Wang, Jing Yang, Yan-Yan Liao, Gang Cheng, Jing Chen, Xiang-Dong Cheng, Jiang-Jiang Qin, and Zongze Shao. Journal of Natural Products 2020 83 (4), 1157-1166 DOI:10.1021/acs.jnatprod.9b01165
Clorinated nitrogen spiro-azaphilones with amino acid residue		chlorofusin	Microdochium caespitosum (initial name Fusarium sp. 22026)	C63H99O19ClN12	1362.6838	Gao, J.-M., Yang, S.-X., & Qin, J.-C. (2013). Azaphilones: Chemistry and Biology. Chemical Reviews, 113(7), 4755–4811. doi:10.1021/cr300402y
Clorinated polycyclic azaphilones with aliphatic side chain		isochromophilone C	Diaporthe sp. SCSIO 41011	C25H31ClO6	462.1809	Luo, X., Lin, X., Tao, H., Wang, J., Li, J., Yang, B., … Liu, Y. (2018). Isochromophilones A–F, Cytotoxic Chloroazaphilones from the Marine Mangrove Endophytic Fungus Diaporthe sp. SCSIO 41011. Journal of Natural Products, 81(4), 934–941. doi:10.1021/acs.jnatprod.7b01053
Clorinated polycyclic azaphilones with aliphatic side chain		isochromophilone D	Diaporthe sp. SCSIO 41011	C25H31ClO6	462.1809	Luo, X., Lin, X., Tao, H., Wang, J., Li, J., Yang, B., … Liu, Y. (2018). Isochromophilones A–F, Cytotoxic Chloroazaphilones from the Marine Mangrove Endophytic Fungus Diaporthe sp. SCSIO 41011. Journal of Natural Products, 81(4), 934–941. doi:10.1021/acs.jnatprod.7b01053
Clorinated polycyclic azaphilones with aliphatic side chain		luteusin C	Talaromyces luteus	C25H29O6Cl	460.1653	Gao, J.-M., Yang, S.-X., & Qin, J.-C. (2013). Azaphilones: Chemistry and Biology. Chemical Reviews, 113(7), 4755–4811. doi:10.1021/cr300402y
Clorinated polycyclic azaphilones with aliphatic side chain		luteusin D	Talaromyces luteus	C25H29O6Cl	460.1653	Gao, J.-M., Yang, S.-X., & Qin, J.-C. (2013). Azaphilones: Chemistry and Biology. Chemical Reviews, 113(7), 4755–4811. doi:10.1021/cr300402y
Clorinated polycyclic azaphilones with aliphatic side chain		RP-1551−1	Penicillium sp. SPC-21609	C25H29O6Cl	460.1653	Gao, J.-M., Yang, S.-X., & Qin, J.-C. (2013). Azaphilones: Chemistry and Biology. Chemical Reviews, 113(7), 4755–4811. doi:10.1021/cr300402y
Clorinated polycyclic azaphilones with aliphatic side chain		RP-1551-5	Penicillium sp. SPC-21609	C25H33O5Cl	448.2017	Gao, J.-M., Yang, S.-X., & Qin, J.-C. (2013). Azaphilones: Chemistry and Biology. Chemical Reviews, 113(7), 4755–4811. doi:10.1021/cr300402y
Clorinated polycyclic azaphilones with aliphatic side chain		RP-1551-6	Penicillium sp. SPC-21609	C25H29O6Cl	460.1653	Gao, J.-M., Yang, S.-X., & Qin, J.-C. (2013). Azaphilones: Chemistry and Biology. Chemical Reviews, 113(7), 4755–4811. doi:10.1021/cr300402y
Clorinated polycyclic azaphilones with aliphatic side chain		RP-1551-M1	Penicillium sp. SPC-21609	C26H31O6Cl	474.1809	Gao, J.-M., Yang, S.-X., & Qin, J.-C. (2013). Azaphilones: Chemistry and Biology. Chemical Reviews, 113(7), 4755–4811. doi:10.1021/cr300402y
Clorinated polycyclic azaphilones with aliphatic side chain		sclerotiorin A	Penicillium sclerotiorum OUCMDZ-3839	C23H29O4Cl	404.1754	Azaphilones from the Marine Sponge-Derived Fungus Penicillium sclerotiorum OUCMDZ-3839 Qian Jia et al. doi: 10.3390/md17050260
Clorinated polycyclic azaphilones with aliphatic side chain		sclerotiorin B	Penicillium sclerotiorum OUCMDZ-3839	C23H29O4Cl	404.1754	Azaphilones from the Marine Sponge-Derived Fungus Penicillium sclerotiorum OUCMDZ-3839 Qian Jia et al. doi: 10.3390/md17050260
Clorinated polycyclic azaphilones with aliphatic side chain		Chaephilone E	Chaetomium globosum	C23H31ClO6	438.1809	Identification of a Unique Azaphilone Produced by Chaetomium globosum Isolated from Polygonatum sibiricum, by Chenggang Song et al.
Clorinated polycyclic azaphilones with lactone ring		chaephilone C	Chaetomium sp. strain NA-S01-R1	C23H27O7Cl	450.1445	Wang, W., Liao, Y., Chen, R., Hou, Y., Ke, W., Zhang, B., Gao, M., Shao, Z., Chen, J., & Li, F. (2018). Chlorinated Azaphilone Pigments with Antimicrobial and Cytotoxic Activities Isolated from the Deep Sea Derived Fungus Chaetomium sp. NA-S01-R1. Marine drugs, 16(2), 61. https://doi.org/10.3390/md16020061
Clorinated polycyclic azaphilones with lactone ring		chaetoviridin B chaetomugilin D	Chaetomium globosum var. flavo-viridae Chaetomium sp. Chaetomium globosum OUPS-T106B-6 Chaetomium globosum (endophyte)	C23H27ClO6	434.1496	Gao, J.-M., Yang, S.-X., & Qin, J.-C. (2013). Azaphilones: Chemistry and Biology. Chemical Reviews, 113(7), 4755–4811. doi:10.1021/cr300402y
Clorinated polycyclic azaphilones with lactone ring		chaetoviridin D	Chaetomium globosum var. flavo-viridae	C23H27ClO7	450.1445	Gao, J.-M., Yang, S.-X., & Qin, J.-C. (2013). Azaphilones: Chemistry and Biology. Chemical Reviews, 113(7), 4755–4811. doi:10.1021/cr300402y
Clorinated polycyclic azaphilones with lactone ring		chaetoviridine I	Chaetomium globosum	C23H27ClO8	466.1394	Gao, J.-M., Yang, S.-X., & Qin, J.-C. (2013). Azaphilones: Chemistry and Biology. Chemical Reviews, 113(7), 4755–4811. doi:10.1021/cr300402y
Clorinated polycyclic azaphilones with lactone ring		chaetomugilin A	Chaetomium globosum OUPS-T106B-6 (marine fungus) Chaetomium globosum (endophyte)	C23H27ClO7	450.1445	Gao, J.-M., Yang, S.-X., & Qin, J.-C. (2013). Azaphilones: Chemistry and Biology. Chemical Reviews, 113(7), 4755–4811. doi:10.1021/cr300402y
Clorinated polycyclic azaphilones with lactone ring		chaetomugilin B	Chaetomium globosum OUPS-T106B-6	C24H29ClO7	464.1602	Gao, J.-M., Yang, S.-X., & Qin, J.-C. (2013). Azaphilones: Chemistry and Biology. Chemical Reviews, 113(7), 4755–4811. doi:10.1021/cr300402y
Clorinated polycyclic azaphilones with lactone ring		chaetomugilin C	Chaetomium globosum OUPS-T106B-6	C23H25ClO6	432.1340	Gao, J.-M., Yang, S.-X., & Qin, J.-C. (2013). Azaphilones: Chemistry and Biology. Chemical Reviews, 113(7), 4755–4811. doi:10.1021/cr300402y
Clorinated polycyclic azaphilones with lactone ring		chaetomugilin E	Chaetomium globosum OUPS-T106B-6	C24H29ClO6	448.1653	Gao, J.-M., Yang, S.-X., & Qin, J.-C. (2013). Azaphilones: Chemistry and Biology. Chemical Reviews, 113(7), 4755–4811. doi:10.1021/cr300402y
Clorinated polycyclic azaphilones with lactone ring		chaetomugilin F	Chaetomium globosum OUPS-T106B-6	C23H25ClO5	416.1391	Gao, J.-M., Yang, S.-X., & Qin, J.-C. (2013). Azaphilones: Chemistry and Biology. Chemical Reviews, 113(7), 4755–4811. doi:10.1021/cr300402y
Clorinated polycyclic azaphilones with lactone ring		11-epi-chaetomugilin A	Chaetomium globosum OUPS-T106B-6	C23H27ClO7	450.1445	Gao, J.-M., Yang, S.-X., & Qin, J.-C. (2013). Azaphilones: Chemistry and Biology. Chemical Reviews, 113(7), 4755–4811. doi:10.1021/cr300402y
Clorinated polycyclic azaphilones with lactone ring		4′-epi-chaetomugilin A	Chaetomium globosum OUPS-T106B-6	C23H27ClO7	450.1445	Gao, J.-M., Yang, S.-X., & Qin, J.-C. (2013). Azaphilones: Chemistry and Biology. Chemical Reviews, 113(7), 4755–4811. doi:10.1021/cr300402y
Clorinated polycyclic azaphilones with lactone ring		chaetomugilin S1	Chaetomium globosum OUPS-T106B-6	C23H27ClO6	434.1496	Gao, J.-M., Yang, S.-X., & Qin, J.-C. (2013). Azaphilones: Chemistry and Biology. Chemical Reviews, 113(7), 4755–4811. doi:10.1021/cr300402y
Clorinated polycyclic azaphilones with lactone ring		chaetomugilin T	Chaetomium globosum OUPS-T106B-6	C23H28O7	416.1835	Gao, J.-M., Yang, S.-X., & Qin, J.-C. (2013). Azaphilones: Chemistry and Biology. Chemical Reviews, 113(7), 4755–4811. doi:10.1021/cr300402y
Clorinated polycyclic azaphilones with lactone ring		chaetomugilin U	Chaetomium globosum OUPS-T106B-6	C23H28O6	400.1886	Gao, J.-M., Yang, S.-X., & Qin, J.-C. (2013). Azaphilones: Chemistry and Biology. Chemical Reviews, 113(7), 4755–4811. doi:10.1021/cr300402y
Clorinated polycyclic azaphlilones		chaetomugilin G	Chaetomium globosum OUPS-T106B-6	C24H29ClO7	464.1602	Gao, J.-M., Yang, S.-X., & Qin, J.-C. (2013). Azaphilones: Chemistry and Biology. Chemical Reviews, 113(7), 4755–4811. doi:10.1021/cr300402y
Clorinated polycyclic azaphlilones		chaetomugilin H	Chaetomium globosum OUPS-T106B-6	C24H29ClO6	448.1653	Gao, J.-M., Yang, S.-X., & Qin, J.-C. (2013). Azaphilones: Chemistry and Biology. Chemical Reviews, 113(7), 4755–4811. doi:10.1021/cr300402y
Clorinated polycyclic azaphlilones		chaetomugilin K	Chaetomium globosum OUPS-T106B-6	C23H29ClO4	404.1754	Gao, J.-M., Yang, S.-X., & Qin, J.-C. (2013). Azaphilones: Chemistry and Biology. Chemical Reviews, 113(7), 4755–4811. doi:10.1021/cr300402y
Clorinated polycyclic azaphlilones		chaetomugilin L	Chaetomium globosum OUPS-T106B-6	C23H29ClO5	420.1704	Gao, J.-M., Yang, S.-X., & Qin, J.-C. (2013). Azaphilones: Chemistry and Biology. Chemical Reviews, 113(7), 4755–4811. doi:10.1021/cr300402y
Clorinated polycyclic azaphlilones		seco-chaetomugilin A	Chaetomium globosum OUPS-T106B-6	C24H31ClO8	482.1707	Gao, J.-M., Yang, S.-X., & Qin, J.-C. (2013). Azaphilones: Chemistry and Biology. Chemical Reviews, 113(7), 4755–4811. doi:10.1021/cr300402y
Clorinated polycyclic azaphlilones		seco-chaetomugilin D	Chaetomium globosum OUPS-T106B-6	C24H31ClO7	466.1758	Gao, J.-M., Yang, S.-X., & Qin, J.-C. (2013). Azaphilones: Chemistry and Biology. Chemical Reviews, 113(7), 4755–4811. doi:10.1021/cr300402y
Dimeric azaphilones		dicitrinone A	Penicillium citrinum HGY1-5 (volcano-ash-derived fungus)	C28H34O6	466.2355	Gao, J.-M., Yang, S.-X., & Qin, J.-C. (2013). Azaphilones: Chemistry and Biology. Chemical Reviews, 113(7), 4755–4811. doi:10.1021/cr300402y
Dimeric azaphilones		dicitrinone B	Penicillium citrinum HGY1-5 (volcano-ash-derived fungus) Penicillium citrinum	C26H30O6	438.2042	Gao, J.-M., Yang, S.-X., & Qin, J.-C. (2013). Azaphilones: Chemistry and Biology. Chemical Reviews, 113(7), 4755–4811. doi:10.1021/cr300402y
Dimeric azaphilones		dicitrinone C	Penicillium citrinum HGY1-5 (volcano-ash-derived fungus) Penicillium citrinum	C25H28O6	424.1886	Gao, J.-M., Yang, S.-X., & Qin, J.-C. (2013). Azaphilones: Chemistry and Biology. Chemical Reviews, 113(7), 4755–4811. doi:10.1021/cr300402y
Dimeric azaphilones		aspergilone B	Aspergillus sp. ZJ-2008001	C39H40O6	604.2825	Gao, J.-M., Yang, S.-X., & Qin, J.-C. (2013). Azaphilones: Chemistry and Biology. Chemical Reviews, 113(7), 4755–4811. doi:10.1021/cr300402y
Dimeric azaphilones with o-orsellinic acid moiety		entonaemin C	Entonaema splendens	C44H44O16	828.2629	Gao, J.-M., Yang, S.-X., & Qin, J.-C. (2013). Azaphilones: Chemistry and Biology. Chemical Reviews, 113(7), 4755–4811. doi:10.1021/cr300402y
Dimeric azaphilones with o-orsellinic acid moiety		rutilin A	Hypoxylon rutilum (Xylariaceae)	C44H40O16	824.2316	Gao, J.-M., Yang, S.-X., & Qin, J.-C. (2013). Azaphilones: Chemistry and Biology. Chemical Reviews, 113(7), 4755–4811. doi:10.1021/cr300402y
Dimeric azaphilones with o-orsellinic acid moiety		rutilin B	Hypoxylon rutilum	C44H40O16	824.2316	Gao, J.-M., Yang, S.-X., & Qin, J.-C. (2013). Azaphilones: Chemistry and Biology. Chemical Reviews, 113(7), 4755–4811. doi:10.1021/cr300402y
Dimeric azaphilones with o-orsellinic acid moiety		(−)-diazaphilonic acid	Talaromyces flavus PF1195	C42H32O18	824.1589	Gao, J.-M., Yang, S.-X., & Qin, J.-C. (2013). Azaphilones: Chemistry and Biology. Chemical Reviews, 113(7), 4755–4811. doi:10.1021/cr300402y
Dimeric spiro-azaphilones		Thielavialide E	Thielavia sp. PA0001	C34H40O12	640.2520	Wijeratne, E. M. K., Espinosa-Artiles, P., Gruener, R., & Gunatilaka, A. A. L. (2014). Thielavialides A–E, Nor-Spiro-azaphilones, and a Bis-spiro-azaphilone from Thielavia sp. PA0001, An Endophytic Fungus Isolated from Aeroponically Grown Physalis alkekengi. Journal of Natural Products, 77(6), 1467–1472. doi:10.1021/np500237h
Dimeric spiro-azaphilones		Cochliodone J	Chaetomium globosum	C34H40O12	640.2520	Sarmales-Murga, C., Akaoka, F., Sato, M., Takanishi, J., Mino, T., Miyoshi, N., & Watanabe, K. (2020). A new class of dimeric product isolated from the fungus Chaetomium globosum: evaluation of chemical structure and biological activity. The Journal of Antibiotics. doi:10.1038/s41429-020-0281-x
Mix of bicyclic azaphilones with aliphatic side chain		daldinin A	Daldinia concentrica (Xylariaceae)	C27H40O5 C29H44O5 C29H42O5 C29H40O5	444.2876 472.3189 470.3032 468.2876	HASHIMOTO, T.; TAHARA, S.; TAKAOKA, S.; TORI, M.; ASAKAWA, Y. STRUCTURES OF DALDINING A∼C, THREE NOVEL AZAPHILONE DERIVATIVES FROM ASCOMYCETOUS FUNGUS KALKINIA CONCENTRICA. CHEMICAL & PHARMACEUTICAL BULLETIN 1994, 42 (11), 2397–2399. https://doi.org/10.1248/cpb.42.2397.
Mix of bicyclic azaphilones with aliphatic side chain		daldinin B	Daldinia concentrica (Xylariaceae)	C27H42O5 C29H46O5 C29H44O5 C29H42O5	446.3032 474.3345 472.3189 470.3032	HASHIMOTO, T.; TAHARA, S.; TAKAOKA, S.; TORI, M.; ASAKAWA, Y. STRUCTURES OF DALDINING A∼C, THREE NOVEL AZAPHILONE DERIVATIVES FROM ASCOMYCETOUS FUNGUS KALKINIA CONCENTRICA. CHEMICAL & PHARMACEUTICAL BULLETIN 1994, 42 (11), 2397–2399. https://doi.org/10.1248/cpb.42.2397.
Nitrogenated azaphilone dimer		chaetofusin A	Chaetomium fusiforme	C34H42N2O10	638.2839	Peng, W., Guo, L., Zheng, C.-J., Zhang, Q.-Y., Jia, M., Jiang, Y.-P., … Qin, L.-P. (2012). Two new azaphilone alkaloids dimers from endophyte Chaetomium fusiforme of the liverwort Scapania verrucosa Heeg. Biochemical Systematics and Ecology, 45, 124–126. doi:10.1016/j.bse.2012.07.003
Nitrogenated azaphilone dimer		chaetofusin B	Chaetomium fusiforme	C34H44N2O10	640.2996	Peng, W., Guo, L., Zheng, C.-J., Zhang, Q.-Y., Jia, M., Jiang, Y.-P., … Qin, L.-P. (2012). Two new azaphilone alkaloids dimers from endophyte Chaetomium fusiforme of the liverwort Scapania verrucosa Heeg. Biochemical Systematics and Ecology, 45, 124–126. doi:10.1016/j.bse.2012.07.003
Nitrogenated azaphilone dimer		chaetoglobin A	Chaetomium globosum IFB-E019 (endophytic)	C34H40N2O10	636.2683	Gao, J.-M., Yang, S.-X., & Qin, J.-C. (2013). Azaphilones: Chemistry and Biology. Chemical Reviews, 113(7), 4755–4811. doi:10.1021/cr300402y
Nitrogenated azaphilone dimer		chaetoglobin B	Chaetomium globosum IFB-E019	C36H44N2O11	680.2945	Gao, J.-M., Yang, S.-X., & Qin, J.-C. (2013). Azaphilones: Chemistry and Biology. Chemical Reviews, 113(7), 4755–4811. doi:10.1021/cr300402y
Nitrogenated azaphilones with lactone ring		Berkchaetorubramine	Pleurostomophora sp.	C27H37NO6	471.2621	Stierle, A. A., Stierle, D. B., Girtsman, T., Mou, T. C., Antczak, C., & Djaballah, H. (2015). Azaphilones from an Acid Mine Extremophile Strain of a Pleurostomophora sp. Journal of Natural Products, 78(12), 2917–2923. doi:10.1021/acs.jnatprod.5b00519
Nitrogenated azaphilones with lactone ring		Glycyl-monascorbrin	M. anka and M. purpureus	C25H31NO6	441.21526	Chen W, Feng Y, Molnár I, Chen F. Nature and nurture: confluence of pathway determinism with metabolic and chemical serendipity diversifies Monascus azaphilone pigments. Nat Prod Rep. 17 avr 2019;36(4):561‑72.
Nitrogenated azaphilones with lactone ring		N-GABAmonascorubrin	M. ruber M7	C27H33NO6	467.2308	Chen W, Feng Y, Molnár I, Chen F. Nature and nurture: confluence of pathway determinism with metabolic and chemical serendipity diversifies Monascus azaphilone pigments. Nat Prod Rep. 17 avr 2019;36(4):561‑72.
Nitrogenated azaphilones with lactone ring		Peniazaphilone A	Penicillium sp. ZJ-27	C25H29NO5	423.2046	Zhang, L., Long, Y., Lei, X., Xu, J., Huang, Z., She, Z., … Liu, L. (2016). Azaphilones isolated from an alga-derived fungus Penicillium sp. ZJ-27. Phytochemistry Letters, 18, 180–186. doi:10.1016/j.phytol.2016.10.010
Nitrogenated azaphilones with lactone ring		Peniazaphilone B	Penicillium sp. ZJ-27	C27H31NO6	465.2151	Zhang, L., Long, Y., Lei, X., Xu, J., Huang, Z., She, Z., … Liu, L. (2016). Azaphilones isolated from an alga-derived fungus Penicillium sp. ZJ-27. Phytochemistry Letters, 18, 180–186. doi:10.1016/j.phytol.2016.10.010
Nitrogenated azaphilones with lactone ring		rubropunctamine	Monascus purpureus Monascus pilosus Monascus purpureus DSM1379	C21H23NO4	353.1627	Gao, J.-M., Yang, S.-X., & Qin, J.-C. (2013). Azaphilones: Chemistry and Biology. Chemical Reviews, 113(7), 4755–4811. doi:10.1021/cr300402y
Nitrogenated azaphilones with lactone ring		monascorubramine	Monascus purpureus Monascus pilosus Monascus purpureus DSM1379	C23H27NO4	381.1940	Gao, J.-M., Yang, S.-X., & Qin, J.-C. (2013). Azaphilones: Chemistry and Biology. Chemical Reviews, 113(7), 4755–4811. doi:10.1021/cr300402y
Nitrogenated azaphilones with lactone ring		PP-R ((10Z)-7-(2-hydroxyethyl)monascorubramine)	Penicillium sp. AZ	C25H31NO5	425.2202	Gao, J.-M., Yang, S.-X., & Qin, J.-C. (2013). Azaphilones: Chemistry and Biology. Chemical Reviews, 113(7), 4755–4811. doi:10.1021/cr300402y
Nitrogenated azaphilones with lactone ring		PP-V ((10Z)-12-carboxylmonascorubramine)	Penicillium sp. AZ	C23H25NO6	411.1682	Gao, J.-M., Yang, S.-X., & Qin, J.-C. (2013). Azaphilones: Chemistry and Biology. Chemical Reviews, 113(7), 4755–4811. doi:10.1021/cr300402y
Nitrogenated azaphilones with lactone ring		monascopyridine A	Monascus purpureus DSM1379	C21H25NO4	355.1784	Gao, J.-M., Yang, S.-X., & Qin, J.-C. (2013). Azaphilones: Chemistry and Biology. Chemical Reviews, 113(7), 4755–4811. doi:10.1021/cr300402y
Nitrogenated azaphilones with lactone ring		monascopyridine B	Monascus purpureus DSM1379	C23H29NO4	383.2097	Gao, J.-M., Yang, S.-X., & Qin, J.-C. (2013). Azaphilones: Chemistry and Biology. Chemical Reviews, 113(7), 4755–4811. doi:10.1021/cr300402y
Nitrogenated azaphilones with lactone ring		L-t-Bg	Monascus sp.	C29H37NO6	495.2621	Gao, J.-M., Yang, S.-X., & Qin, J.-C. (2013). Azaphilones: Chemistry and Biology. Chemical Reviews, 113(7), 4755–4811. doi:10.1021/cr300402y
Nitrogenated azaphilones with lactone ring		H-Cha	Monascus sp.	C32H41NO6	535.2934	Gao, J.-M., Yang, S.-X., & Qin, J.-C. (2013). Azaphilones: Chemistry and Biology. Chemical Reviews, 113(7), 4755–4811. doi:10.1021/cr300402y
Nitrogenated azaphilones with lactone ring		H-Pen	Monascus sp.	C28H35NO6S	513.2185	Gao, J.-M., Yang, S.-X., & Qin, J.-C. (2013). Azaphilones: Chemistry and Biology. Chemical Reviews, 113(7), 4755–4811. doi:10.1021/cr300402y
Nitrogenated azaphilones with lactone ring		sequoiamonascin D	Aspergillus parasiticus RDWD1-2 (endophyte) Penicillium sp. JP-1	C26H33NO7	471.2257	Gao, J.-M., Yang, S.-X., & Qin, J.-C. (2013). Azaphilones: Chemistry and Biology. Chemical Reviews, 113(7), 4755–4811. doi:10.1021/cr300402y
Nitrogenated azaphilones with lactone ring		Glycyl-rubropunctatin	M. anka and M. purpureus	C23H27NO6	413.1838	Chen W, Feng Y, Molnár I, Chen F. Nature and nurture: confluence of pathway determinism with metabolic and chemical serendipity diversifies Monascus azaphilone pigments. Nat Prod Rep. 17 avr 2019;36(4):561‑72.
Nitrogenated azaphilones with lactone ring		N-GABArubropunctatin	M. ruber M7	C25H29NO6	439.1995	Chen W, Feng Y, Molnár I, Chen F. Nature and nurture: confluence of pathway determinism with metabolic and chemical serendipity diversifies Monascus azaphilone pigments. Nat Prod Rep. 17 avr 2019;36(4):561‑72.
Nitrogenated azaphilones with lactone ring		Unnamed	M. purpureus NFCCI 1756	C21H29NO5	375.2046	Chen W, Feng Y, Molnár I, Chen F. Nature and nurture: confluence of pathway determinism with metabolic and chemical serendipity diversifies Monascus azaphilone pigments. Nat Prod Rep. 17 avr 2019;36(4):561‑72.
Nitrogenated azaphilones with lactone ring		sassafrinamine A	Aspergillus neoglaber	C29H35NO6	493.2464	Isbrandt, T., Frisvad, J.C., Madsen, A. et al. New azaphilones from Aspergillus neoglaber.AMB Expr 10, 145 (2020). https://doi.org/10.1186/s13568-020-01078-4
Nitrogenated azaphilones with lactone ring and amino acid residue		N-Lys-monascorubrin	M. ruber M7	C29H38N2O6	510.2730	Chen W, Feng Y, Molnár I, Chen F. Nature and nurture: confluence of pathway determinism with metabolic and chemical serendipity diversifies Monascus azaphilone pigments. Nat Prod Rep. 17 avr 2019;36(4):561‑72.
Nitrogenated azaphilones with lactone ring and amino acid residue		N-Lys-rubropunctatin	M. ruber M7	C27H34N2O6	482.2417	Chen W, Feng Y, Molnár I, Chen F. Nature and nurture: confluence of pathway determinism with metabolic and chemical serendipity diversifies Monascus azaphilone pigments. Nat Prod Rep. 17 avr 2019;36(4):561‑72.
Nitrogenated azaphilones with lactone ring and amino acid residue		monascorubrin arginine	Monascus ruber	C29H38N4O6	538.2791	Gao, J.-M., Yang, S.-X., & Qin, J.-C. (2013). Azaphilones: Chemistry and Biology. Chemical Reviews, 113(7), 4755–4811. doi:10.1021/cr300402y
Nitrogenated azaphilones with lactone ring and amino acid residue		N-glutarylmonascorubramine GTM	Monascus ruber Monascus purpureus	C28H33NO8	511.2206	Gao, J.-M., Yang, S.-X., & Qin, J.-C. (2013). Azaphilones: Chemistry and Biology. Chemical Reviews, 113(7), 4755–4811. doi:10.1021/cr300402y
Nitrogenated azaphilones with lactone ring and amino acid residue		N-glutarylrubropunctamine GTR	Monascus ruber Monascus purpureus	C26H29NO8	483.1893	Gao, J.-M., Yang, S.-X., & Qin, J.-C. (2013). Azaphilones: Chemistry and Biology. Chemical Reviews, 113(7), 4755–4811. doi:10.1021/cr300402y
Nitrogenated azaphilones with lactone ring and amino acid residue		monascorubrin L-alanine	Monascus ruber	C26H31NO6	453.2151	Gao, J.-M., Yang, S.-X., & Qin, J.-C. (2013). Azaphilones: Chemistry and Biology. Chemical Reviews, 113(7), 4755–4811. doi:10.1021/cr300402y
Nitrogenated azaphilones with lactone ring and amino acid residue		monascorubrin ethyl L-tyrosine	Monascus ruber	C34H41NO7	575.2883	Gao, J.-M., Yang, S.-X., & Qin, J.-C. (2013). Azaphilones: Chemistry and Biology. Chemical Reviews, 113(7), 4755–4811. doi:10.1021/cr300402y
Nitrogenated azaphilones with lactone ring and amino acid residue		rubropunctatin L-alanine	Monascus ruber	C24H27NO6	425.1838	Gao, J.-M., Yang, S.-X., & Qin, J.-C. (2013). Azaphilones: Chemistry and Biology. Chemical Reviews, 113(7), 4755–4811. doi:10.1021/cr300402y
Nitrogenated azaphilones with lactone ring and amino acid residue		rubropunctatin l-tryptophane	Monascus ruber	C32H34N2O6	542.2417	Gao, J.-M., Yang, S.-X., & Qin, J.-C. (2013). Azaphilones: Chemistry and Biology. Chemical Reviews, 113(7), 4755–4811. doi:10.1021/cr300402y
Nitrogenated azaphilones with lactone ring and amino acid residue		monascorubrin L-aspartate	Monascus ruber	C27H31NO8	497.2050	Gao, J.-M., Yang, S.-X., & Qin, J.-C. (2013). Azaphilones: Chemistry and Biology. Chemical Reviews, 113(7), 4755–4811. doi:10.1021/cr300402y
Nitrogenated azaphilones with lactone ring and amino acid residue		rubropunctatin arginine	Monascus ruber	C27H34N4O6	510.2478	Gao, J.-M., Yang, S.-X., & Qin, J.-C. (2013). Azaphilones: Chemistry and Biology. Chemical Reviews, 113(7), 4755–4811. doi:10.1021/cr300402y
Nitrogenated azaphilones with lactone ring and amino acid residue		H-Nle	Monascus sp.	C28H35NO6	481.2464	Gao, J.-M., Yang, S.-X., & Qin, J.-C. (2013). Azaphilones: Chemistry and Biology. Chemical Reviews, 113(7), 4755–4811. doi:10.1021/cr300402y
Nitrogenated azaphilones with lactone ring and amino acid residue		rubropunctatin L-aspartate	Monascus ruber	C25H27NO8	469.1737	Gao, J.-M., Yang, S.-X., & Qin, J.-C. (2013). Azaphilones: Chemistry and Biology. Chemical Reviews, 113(7), 4755–4811. doi:10.1021/cr300402y
Nitrogenated azaphilones with lactone ring and amino acid residue		rubropunctatin D-aspartate	Monascus ruber	C25H27NO8	469.1737	Gao, J.-M., Yang, S.-X., & Qin, J.-C. (2013). Azaphilones: Chemistry and Biology. Chemical Reviews, 113(7), 4755–4811. doi:10.1021/cr300402y
Nitrogenated azaphilones with lactone ring and amino acid residue		rubropunctatin glycine	Monascus purpureus	C23H25NO6	411.1682	Gao, J.-M., Yang, S.-X., & Qin, J.-C. (2013). Azaphilones: Chemistry and Biology. Chemical Reviews, 113(7), 4755–4811. doi:10.1021/cr300402y
Nitrogenated azaphilones with lactone ring and amino acid residue		monascorubrin D-alanine	Monascus ruber	C26H31NO6	453.2151	Gao, J.-M., Yang, S.-X., & Qin, J.-C. (2013). Azaphilones: Chemistry and Biology. Chemical Reviews, 113(7), 4755–4811. doi:10.1021/cr300402y
Nitrogenated azaphilones with lactone ring and amino acid residue		rubropunctatin ethyl L-tyrosine	Monascus ruber	C32H37NO7	547.2570	Gao, J.-M., Yang, S.-X., & Qin, J.-C. (2013). Azaphilones: Chemistry and Biology. Chemical Reviews, 113(7), 4755–4811. doi:10.1021/cr300402y
Nitrogenated azaphilones with lactone ring and amino acid residue		rubropunctatin ethyl L-leucine	Monascus ruber	C29H39NO6	497.2777	Gao, J.-M., Yang, S.-X., & Qin, J.-C. (2013). Azaphilones: Chemistry and Biology. Chemical Reviews, 113(7), 4755–4811. doi:10.1021/cr300402y
Nitrogenated azaphilones with lactone ring and amino acid residue		rubropunctatin D-alanine	Monascus ruber	C24H27NO6	425.1838	Gao, J.-M., Yang, S.-X., & Qin, J.-C. (2013). Azaphilones: Chemistry and Biology. Chemical Reviews, 113(7), 4755–4811. doi:10.1021/cr300402y
Nitrogenated azaphilones with lactone ring and amino acid residue		monascorubrin D-tyrosine	Monascus ruber	C32H37NO7	547.2570	Gao, J.-M., Yang, S.-X., & Qin, J.-C. (2013). Azaphilones: Chemistry and Biology. Chemical Reviews, 113(7), 4755–4811. doi:10.1021/cr300402y
Nitrogenated azaphilones with lactone ring and amino acid residue		monascorubrin glycine	Monascus purpureus	C25H29NO6	439.1995	Gao, J.-M., Yang, S.-X., & Qin, J.-C. (2013). Azaphilones: Chemistry and Biology. Chemical Reviews, 113(7), 4755–4811. doi:10.1021/cr300402y
Nitrogenated azaphilones with lactone ring and amino acid residue		rubropunctatin L-threonine	Monascus ruber	C25H29NO7	455.1944	Gao, J.-M., Yang, S.-X., & Qin, J.-C. (2013). Azaphilones: Chemistry and Biology. Chemical Reviews, 113(7), 4755–4811. doi:10.1021/cr300402y
Nitrogenated azaphilones with lactone ring and amino acid residue		monascorubrin L-threonine	Monascus ruber	C27H33NO7	483.2257	Gao, J.-M., Yang, S.-X., & Qin, J.-C. (2013). Azaphilones: Chemistry and Biology. Chemical Reviews, 113(7), 4755–4811. doi:10.1021/cr300402y
Nitrogenated azaphilones with lactone ring and amino acid residue		monascorubrin D-aspartate	Monascus ruber	C27H31NO8	497.2050	Gao, J.-M., Yang, S.-X., & Qin, J.-C. (2013). Azaphilones: Chemistry and Biology. Chemical Reviews, 113(7), 4755–4811. doi:10.1021/cr300402y
Nitrogenated azaphilones with lactone ring and amino acid residue		rubropunctatin D-tyrosine	Monascus ruber	C30H33NO7	519.2257	Gao, J.-M., Yang, S.-X., & Qin, J.-C. (2013). Azaphilones: Chemistry and Biology. Chemical Reviews, 113(7), 4755–4811. doi:10.1021/cr300402y
Nitrogenated azaphilones with lactone ring and amino acid residue		monascorubrin ethyl L-leucine	Monascus ruber	C31H43NO6	525.3090	Gao, J.-M., Yang, S.-X., & Qin, J.-C. (2013). Azaphilones: Chemistry and Biology. Chemical Reviews, 113(7), 4755–4811. doi:10.1021/cr300402y
Nitrogenated azaphilones with lactone ring and amino acid residue		monascorubrin l-tryptophane	Monascus ruber	C34H38N2O6	570.2730	Gao, J.-M., Yang, S.-X., & Qin, J.-C. (2013). Azaphilones: Chemistry and Biology. Chemical Reviews, 113(7), 4755–4811. doi:10.1021/cr300402y
Nitrogenated azaphilones with lactone ring and amino acid residue		Unnamed	M. ruber 102w	C27H34N4O6	510.2478	Chen W, Feng Y, Molnár I, Chen F. Nature and nurture: confluence of pathway determinism with metabolic and chemical serendipity diversifies Monascus azaphilone pigments. Nat Prod Rep. 17 avr 2019;36(4):561‑72.
Nitrogenated azaphilones with lactone ring and amino acid residue		Unnamed	M. ruber 102w	C29H38N4O6	538.2791	Chen W, Feng Y, Molnár I, Chen F. Nature and nurture: confluence of pathway determinism with metabolic and chemical serendipity diversifies Monascus azaphilone pigments. Nat Prod Rep. 17 avr 2019;36(4):561‑72.
Nitrogenated azaphilones with lactone ring and amino acid residue		Atrorosin A	Talaromyces atroroseus	C26H29O8N	483.1893	Isbrandt, T., Tolborg, G., Ødum, A., Workman, M., & Larsen, T. O. (2019). Atrorosins: a new subgroup of Monascus pigments from Talaromyces atroroseus. Applied Microbiology and Biotechnology. doi:10.1007/s00253-019-10216-3
Nitrogenated azaphilones with lactone ring and amino acid residue		Atrorosin C	Talaromyces atroroseus	C26H29O8NS	515.1614	Isbrandt, T., Tolborg, G., Ødum, A., Workman, M., & Larsen, T. O. (2019). Atrorosins: a new subgroup of Monascus pigments from Talaromyces atroroseus. Applied Microbiology and Biotechnology. doi:10.1007/s00253-019-10216-3
Nitrogenated azaphilones with lactone ring and amino acid residue		Atrorosin D	Talaromyces atroroseus	C27H29O10N	527.1791	Isbrandt, T., Tolborg, G., Ødum, A., Workman, M., & Larsen, T. O. (2019). Atrorosins: a new subgroup of Monascus pigments from Talaromyces atroroseus. Applied Microbiology and Biotechnology. doi:10.1007/s00253-019-10216-3
Nitrogenated azaphilones with lactone ring and amino acid residue		Atrorosin E	Talaromyces atroroseus	C28H31O10N	541.1948	Isbrandt, T., Tolborg, G., Ødum, A., Workman, M., & Larsen, T. O. (2019). Atrorosins: a new subgroup of Monascus pigments from Talaromyces atroroseus. Applied Microbiology and Biotechnology. doi:10.1007/s00253-019-10216-3
Nitrogenated azaphilones with lactone ring and amino acid residue		Atrorosin F	Talaromyces atroroseus	C32H33O8N	559.2206	Isbrandt, T., Tolborg, G., Ødum, A., Workman, M., & Larsen, T. O. (2019). Atrorosins: a new subgroup of Monascus pigments from Talaromyces atroroseus. Applied Microbiology and Biotechnology. doi:10.1007/s00253-019-10216-3
Nitrogenated azaphilones with lactone ring and amino acid residue		Atrorosin G	Talaromyces atroroseus	C25H27O8N	469.1737	Isbrandt, T., Tolborg, G., Ødum, A., Workman, M., & Larsen, T. O. (2019). Atrorosins: a new subgroup of Monascus pigments from Talaromyces atroroseus. Applied Microbiology and Biotechnology. doi:10.1007/s00253-019-10216-3
Nitrogenated azaphilones with lactone ring and amino acid residue		Atrorosin H	Talaromyces atroroseus	C29H31O8N3	549.2111	Isbrandt, T., Tolborg, G., Ødum, A., Workman, M., & Larsen, T. O. (2019). Atrorosins: a new subgroup of Monascus pigments from Talaromyces atroroseus. Applied Microbiology and Biotechnology. doi:10.1007/s00253-019-10216-3
Nitrogenated azaphilones with lactone ring and amino acid residue		Atrorosin I	Talaromyces atroroseus	C29H35O8N	525.2363	Isbrandt, T., Tolborg, G., Ødum, A., Workman, M., & Larsen, T. O. (2019). Atrorosins: a new subgroup of Monascus pigments from Talaromyces atroroseus. Applied Microbiology and Biotechnology. doi:10.1007/s00253-019-10216-3
Nitrogenated azaphilones with lactone ring and amino acid residue	undefined regioisomer	Atrorosin K	Talaromyces atroroseus	C29H31O8N3	549.2111	Isbrandt, T., Tolborg, G., Ødum, A., Workman, M., & Larsen, T. O. (2019). Atrorosins: a new subgroup of Monascus pigments from Talaromyces atroroseus. Applied Microbiology and Biotechnology. doi:10.1007/s00253-019-10216-3
Nitrogenated azaphilones with lactone ring and amino acid residue		Atrorosin L	Talaromyces atroroseus	C29H35O8N	525.2363	Isbrandt, T., Tolborg, G., Ødum, A., Workman, M., & Larsen, T. O. (2019). Atrorosins: a new subgroup of Monascus pigments from Talaromyces atroroseus. Applied Microbiology and Biotechnology. doi:10.1007/s00253-019-10216-3
Nitrogenated azaphilones with lactone ring and amino acid residue		Atrorosin M	Talaromyces atroroseus	C28H33O8NS	543.1927	Isbrandt, T., Tolborg, G., Ødum, A., Workman, M., & Larsen, T. O. (2019). Atrorosins: a new subgroup of Monascus pigments from Talaromyces atroroseus. Applied Microbiology and Biotechnology. doi:10.1007/s00253-019-10216-3
Nitrogenated azaphilones with lactone ring and amino acid residue		Atrorosin N	Talaromyces atroroseus	C27H30O9N2	526.1951	Isbrandt, T., Tolborg, G., Ødum, A., Workman, M., & Larsen, T. O. (2019). Atrorosins: a new subgroup of Monascus pigments from Talaromyces atroroseus. Applied Microbiology and Biotechnology. doi:10.1007/s00253-019-10216-3
Nitrogenated azaphilones with lactone ring and amino acid residue		Atrorosin Q	Talaromyces atroroseus	C28H32O9N2	540.2108	Isbrandt, T., Tolborg, G., Ødum, A., Workman, M., & Larsen, T. O. (2019). Atrorosins: a new subgroup of Monascus pigments from Talaromyces atroroseus. Applied Microbiology and Biotechnology. doi:10.1007/s00253-019-10216-3
Nitrogenated azaphilones with lactone ring and amino acid residue		Atrorosin R	Talaromyces atroroseus	C29H36O8N4	568.2533	Isbrandt, T., Tolborg, G., Ødum, A., Workman, M., & Larsen, T. O. (2019). Atrorosins: a new subgroup of Monascus pigments from Talaromyces atroroseus. Applied Microbiology and Biotechnology. doi:10.1007/s00253-019-10216-3
Nitrogenated azaphilones with lactone ring and amino acid residue		Atrorosin T	Talaromyces atroroseus	C27H31O9N	513.1999	Isbrandt, T., Tolborg, G., Ødum, A., Workman, M., & Larsen, T. O. (2019). Atrorosins: a new subgroup of Monascus pigments from Talaromyces atroroseus. Applied Microbiology and Biotechnology. doi:10.1007/s00253-019-10216-3
Nitrogenated azaphilones with lactone ring and amino acid residue		Atrorosin V	Talaromyces atroroseus	C28H33O8N	511.2206	Isbrandt, T., Tolborg, G., Ødum, A., Workman, M., & Larsen, T. O. (2019). Atrorosins: a new subgroup of Monascus pigments from Talaromyces atroroseus. Applied Microbiology and Biotechnology. doi:10.1007/s00253-019-10216-3
Nitrogenated azaphilones with lactone ring and amino acid residue		Atrorosin W	Talaromyces atroroseus	C34H34O8N2	598.2315	Isbrandt, T., Tolborg, G., Ødum, A., Workman, M., & Larsen, T. O. (2019). Atrorosins: a new subgroup of Monascus pigments from Talaromyces atroroseus. Applied Microbiology and Biotechnology. doi:10.1007/s00253-019-10216-3
Nitrogenated azaphilones with lactone ring and amino acid residue		Atrorosin Y	Talaromyces atroroseus	C32H33O9N	575.2155	Isbrandt, T., Tolborg, G., Ødum, A., Workman, M., & Larsen, T. O. (2019). Atrorosins: a new subgroup of Monascus pigments from Talaromyces atroroseus. Applied Microbiology and Biotechnology. doi:10.1007/s00253-019-10216-3
Nitrogenated azaphilones with lactone ring and osidic pattern		N-glucosylmonascorubramine GCM	Monascus ruber	C29H37NO9	543.2468	Gao, J.-M., Yang, S.-X., & Qin, J.-C. (2013). Azaphilones: Chemistry and Biology. Chemical Reviews, 113(7), 4755–4811. doi:10.1021/cr300402y
Nitrogenated azaphilones with lactone ring and osidic pattern		N-glucosylrubropunctamine GCR	Monascus ruber	C27H33NO9	515.2155	Gao, J.-M., Yang, S.-X., & Qin, J.-C. (2013). Azaphilones: Chemistry and Biology. Chemical Reviews, 113(7), 4755–4811. doi:10.1021/cr300402y
Polycyclic azaphilones		pennicitrinone A (dicitrinin A)	Penicillium citrinum IFM 53298 Penicillium citrinum MST-F10130 Penicillium citrinum B-57 Penicillium notatum B-52 Penicillium citrinum HGY1-5 (volcano-ash-derived fungus) Penicillium sp. H9318 Penicillium citrinum	C23H24O5	380.1624	Gao, J.-M., Yang, S.-X., & Qin, J.-C. (2013). Azaphilones: Chemistry and Biology. Chemical Reviews, 113(7), 4755–4811. doi:10.1021/cr300402y
Polycyclic azaphilones		pennicitrinone B	Penicillium citrinum IFM 53298	C23H22O5	378.1467	Gao, J.-M., Yang, S.-X., & Qin, J.-C. (2013). Azaphilones: Chemistry and Biology. Chemical Reviews, 113(7), 4755–4811. doi:10.1021/cr300402y
Polycyclic azaphilones		pennicitrinone D ((3′R)-3′-hydroxypennicitrinone A)	Penicillium notatum B-52	C23H24O6	396.1573	Gao, J.-M., Yang, S.-X., & Qin, J.-C. (2013). Azaphilones: Chemistry and Biology. Chemical Reviews, 113(7), 4755–4811. doi:10.1021/cr300402y
Polycyclic azaphilones		penicitrinol A	Penicillium citrinum IFM 53298 Penicillium citrinum B-57 Penicillium sp. H9318	C23H26O5	382.1780	Gao, J.-M., Yang, S.-X., & Qin, J.-C. (2013). Azaphilones: Chemistry and Biology. Chemical Reviews, 113(7), 4755–4811. doi:10.1021/cr300402y
Polycyclic azaphilones		penicitrinol B	Penicillium citrinum B-57 Penicillium sp. H9318	C24H28O6	412.1887	Gao, J.-M., Yang, S.-X., & Qin, J.-C. (2013). Azaphilones: Chemistry and Biology. Chemical Reviews, 113(7), 4755–4811. doi:10.1021/cr300402y
Polycyclic azaphilones		penicitrinol D	Penicillium citrinum	C16H22O4	278.1518	Gao, J.-M., Yang, S.-X., & Qin, J.-C. (2013). Azaphilones: Chemistry and Biology. Chemical Reviews, 113(7), 4755–4811. doi:10.1021/cr300402y
Polycyclic azaphilones		penicitrinol E	Penicillium citrinum	C16H22O4	278.1518	Gao, J.-M., Yang, S.-X., & Qin, J.-C. (2013). Azaphilones: Chemistry and Biology. Chemical Reviews, 113(7), 4755–4811. doi:10.1021/cr300402y
Polycyclic azaphilones		penicitrinol F	Penicillium citrinum	C15H20O4	264.1362	Gao, J.-M., Yang, S.-X., & Qin, J.-C. (2013). Azaphilones: Chemistry and Biology. Chemical Reviews, 113(7), 4755–4811. doi:10.1021/cr300402y
Polycyclic azaphilones		penicitrinol F1	Penicillium citrinum HGY1-5 (volcano-ash-derived fungus)	C24H28O6	412.1886	Gao, J.-M., Yang, S.-X., & Qin, J.-C. (2013). Azaphilones: Chemistry and Biology. Chemical Reviews, 113(7), 4755–4811. doi:10.1021/cr300402y
Polycyclic azaphilones		penicitrinol G	Penicillium citrinum	C15H20O4	264.1362	Gao, J.-M., Yang, S.-X., & Qin, J.-C. (2013). Azaphilones: Chemistry and Biology. Chemical Reviews, 113(7), 4755–4811. doi:10.1021/cr300402y
Polycyclic azaphilones		penicitrinol H	Penicillium citrinum	C15H20O4	264.1362	Gao, J.-M., Yang, S.-X., & Qin, J.-C. (2013). Azaphilones: Chemistry and Biology. Chemical Reviews, 113(7), 4755–4811. doi:10.1021/cr300402y
Polycyclic azaphilones		penicitrinol I	Penicillium citrinum	C14H18O4	250.1205	Gao, J.-M., Yang, S.-X., & Qin, J.-C. (2013). Azaphilones: Chemistry and Biology. Chemical Reviews, 113(7), 4755–4811. doi:10.1021/cr300402y
Polycyclic azaphilones		dicitrinol A	Penicillium citrinum HGY1-5 (volcano-ash-derived fungus)	C25H30O6	426.2042	Gao, J.-M., Yang, S.-X., & Qin, J.-C. (2013). Azaphilones: Chemistry and Biology. Chemical Reviews, 113(7), 4755–4811. doi:10.1021/cr300402y
Polycyclic azaphilones		dicitrinol B	Penicillium citrinum HGY1-5 (volcano-ash-derived fungus)	C25H30O6	426.2042	Gao, J.-M., Yang, S.-X., & Qin, J.-C. (2013). Azaphilones: Chemistry and Biology. Chemical Reviews, 113(7), 4755–4811. doi:10.1021/cr300402y
Polycyclic azaphilones		tricitrinol A	Penicillium citrinum HGY1-5 (volcano-ash-derived fungus)	C37H44O9	632.2985	Gao, J.-M., Yang, S.-X., & Qin, J.-C. (2013). Azaphilones: Chemistry and Biology. Chemical Reviews, 113(7), 4755–4811. doi:10.1021/cr300402y
Polycyclic azaphilones		tricitrinol B	Penicillium citrinum HGY1-5 (volcano-ash-derived fungus)	C37H44O9	632.2985	Gao, J.-M., Yang, S.-X., & Qin, J.-C. (2013). Azaphilones: Chemistry and Biology. Chemical Reviews, 113(7), 4755–4811. doi:10.1021/cr300402y
Polycyclic azaphilones		nigbeauvin B	Nigrospora oryzae co-cultured with Beauveria bassiana	C13H16O7	284.0896	Zhang, Z.-X., Yang, X.-Q., Zhou, Q.-Y., Wang, B.-Y., Hu, M., Yang, Y.-B., … Ding, Z.-T. (2018). New Azaphilones from Nigrospora oryzae Co-Cultured with Beauveria bassiana. Molecules, 23(7), 1816. doi:10.3390/molecules23071816
Polycyclic azaphilones		Peniazaphilin A	Penicillium sp. CPCC 400786	C14H20O6	283.1160	Zhang, D., Zhao, J., Wang, X., Zhao, L., Liu, H., Wei, Y., … Yu, L. (2018). Peniazaphilin A, a new azaphilone derivative produced by Penicillium sp. CPCC 400786. The Journal of Antibiotics. doi:10.1038/s41429-018-0077-4
Polycyclic azaphilones with aliphatic side chain		citrinin H1	Penicillium citrinum B-57	C24H26O7	426.1679	Gao, J.-M., Yang, S.-X., & Qin, J.-C. (2013). Azaphilones: Chemistry and Biology. Chemical Reviews, 113(7), 4755–4811. doi:10.1021/cr300402y
Polycyclic azaphilones with aliphatic side chain		pennicitrinone C	Penicillium citrinum B-57	C23H26O6	398.1729	Gao, J.-M., Yang, S.-X., & Qin, J.-C. (2013). Azaphilones: Chemistry and Biology. Chemical Reviews, 113(7), 4755–4811. doi:10.1021/cr300402y
Polycyclic azaphilones with aliphatic side chain		perinadine A	Penicillium citrinum N055 (marine fungus)	C28H37NO7	499.2570	Gao, J.-M., Yang, S.-X., & Qin, J.-C. (2013). Azaphilones: Chemistry and Biology. Chemical Reviews, 113(7), 4755–4811. doi:10.1021/cr300402y
Polycyclic azaphilones with aliphatic side chain		bisbynin	Stachybotrys bisbyi (Srinivasan) Barron	C15H22O5	282.1467	Gao, J.-M., Yang, S.-X., & Qin, J.-C. (2013). Azaphilones: Chemistry and Biology. Chemical Reviews, 113(7), 4755–4811. doi:10.1021/cr300402y
Polycyclic azaphilones with aliphatic side chain		Citrifuran A	Aspergillus sp.	C27H32O7	468.2148	Yin, G.-P., Wu, Y.-R., Yang, M.-H., Li, T.-X., Wang, X.-B., Zhou, M.-M., … Kong, L.-Y. (2017). Citrifurans A–D, Four Dimeric Aromatic Polyketides with New Carbon Skeletons from the Fungus Aspergillus sp. Organic Letters, 19(15), 4058–4061. doi:10.1021/acs.orglett.7b01823
Polycyclic azaphilones with aliphatic side chain		Citrifuran B	Aspergillus sp.	C27H32O8	484.2097	Yin, G.-P., Wu, Y.-R., Yang, M.-H., Li, T.-X., Wang, X.-B., Zhou, M.-M., … Kong, L.-Y. (2017). Citrifurans A–D, Four Dimeric Aromatic Polyketides with New Carbon Skeletons from the Fungus Aspergillus sp. Organic Letters, 19(15), 4058–4061. doi:10.1021/acs.orglett.7b01823
Polycyclic azaphilones with aliphatic side chain		Citrifuran C	Aspergillus sp.	C27H32O8	484.2097	Yin, G.-P., Wu, Y.-R., Yang, M.-H., Li, T.-X., Wang, X.-B., Zhou, M.-M., … Kong, L.-Y. (2017). Citrifurans A–D, Four Dimeric Aromatic Polyketides with New Carbon Skeletons from the Fungus Aspergillus sp. Organic Letters, 19(15), 4058–4061. doi:10.1021/acs.orglett.7b01823
Polycyclic azaphilones with aliphatic side chain		Citrifuran D	Aspergillus sp.	C28H32O9	512.2046	Yin, G.-P., Wu, Y.-R., Yang, M.-H., Li, T.-X., Wang, X.-B., Zhou, M.-M., … Kong, L.-Y. (2017). Citrifurans A–D, Four Dimeric Aromatic Polyketides with New Carbon Skeletons from the Fungus Aspergillus sp. Organic Letters, 19(15), 4058–4061. doi:10.1021/acs.orglett.7b01823
Polycyclic azaphilones with aliphatic side chain		Coniellin H	Coniella fragariae	C23H28O7	416.1835	Yu, H., Sperlich, J., Höfert, S.-P., Janiak, C., Teusch, N., Stuhldreier, F., … Proksch, P. (2019). Azaphilone pigments and macrodiolides from the coprophilous fungus Coniella fragariae. Fitoterapia, 104249. doi:10.1016/j.fitote.2019.104249
Polycyclic azaphilones with aliphatic side chain		Coniellin I	Coniella fragariae	C22H26O7	402.1679	Yu, H., Sperlich, J., Höfert, S.-P., Janiak, C., Teusch, N., Stuhldreier, F., … Proksch, P. (2019). Azaphilone pigments and macrodiolides from the coprophilous fungus Coniella fragariae. Fitoterapia, 104249. doi:10.1016/j.fitote.2019.104249
Polycyclic azaphilones with aliphatic side chain		Monapurfluore A	M. purpureus NTU 568	C23H32O4	372.2301	Gao, J.-M., Yang, S.-X., & Qin, J.-C. (2013). Azaphilones: Chemistry and Biology. Chemical Reviews, 113(7), 4755–4811. doi:10.1021/cr300402y
Polycyclic azaphilones with aliphatic side chain		Monapurfluore B	M. purpureus NTU 568	C23H32O4	372.2301	Gao, J.-M., Yang, S.-X., & Qin, J.-C. (2013). Azaphilones: Chemistry and Biology. Chemical Reviews, 113(7), 4755–4811. doi:10.1021/cr300402y
Polycyclic azaphilones with aliphatic side chain		Monascusazaphilone A	Monascus purpureus BCRC 38108	C23H32O4	372.2301	Wu, M.-D., Cheng, M.-J., Yech, Y.-J., Chen, Y.-L., Chen, K.-P., Yang, P.-H., … Yuan, G.-F. (2013). Monascusazaphilones A–C, three new azaphilone analogues isolated from the fungusMonascus purpureusBCRC 38108. Natural Product Research, 27(13), 1145–1152. doi:10.1080/14786419.2012.715289
Polycyclic azaphilones with aliphatic side chain		monapurone B	Monascus purpureus	C21H28O4	344.1988	Gao, J.-M., Yang, S.-X., & Qin, J.-C. (2013). Azaphilones: Chemistry and Biology. Chemical Reviews, 113(7), 4755–4811. doi:10.1021/cr300402y
Polycyclic azaphilones with aliphatic side chain		monapurone C	Monascus purpureus	C21H28O4	344.1988	Gao, J.-M., Yang, S.-X., & Qin, J.-C. (2013). Azaphilones: Chemistry and Biology. Chemical Reviews, 113(7), 4755–4811. doi:10.1021/cr300402y
Polycyclic azaphilones with aliphatic side chain		sclerotiorin C	Penicillium sclerotiorum OUCMDZ-3839	C23H30O4	370.2144	Azaphilones from the Marine Sponge-Derived Fungus Penicillium sclerotiorum OUCMDZ-3839 Qian Jia et al. doi: 10.3390/md17050260
Polycyclic azaphilones with aliphatic side chain		Xanthomonasin A	M. anka U-1	C21H24O7	388.1522	Chen W, Feng Y, Molnár I, Chen F. Nature and nurture: confluence of pathway determinism with metabolic and chemical serendipity diversifies Monascus azaphilone pigments. Nat Prod Rep. 17 avr 2019;36(4):561‑72.
Polycyclic azaphilones with aliphatic side chain		Xanthomonasin B	M. anka U-1	C23H28O7	416.1835	Chen W, Feng Y, Molnár I, Chen F. Nature and nurture: confluence of pathway determinism with metabolic and chemical serendipity diversifies Monascus azaphilone pigments. Nat Prod Rep. 17 avr 2019;36(4):561‑72.
Polycyclic azaphilones with aliphatic side chain		Phialomustin D	Phialophora mustea	C25H28O8	456.1784	Nalli, Y., Mirza, D. N., Wani, Z. A., Wadhwa, B., Mallik, F. A., Raina, C., … Ali, A. (2015). Phialomustin A–D, new antimicrobial and cytotoxic metabolites from an endophytic fungus, Phialophora mustea. RSC Advances, 5(115), 95307–95312. doi:10.1039/c5ra18121f
Polycyclic azaphlilones with lactone ring		pitholide E	Pestalotiopsis microspora	C22H26O6	386.1729	Secondary Metabolites Produced by an Endophytic Fungus Pestalotiopsis microspora, G. R. Nalin Rathnayake et al.
Polycyclic azaphlilones with lactone ring		acetosellin	Cercosporella acetosella Ell Epicoccum nigrum (strain 749)	C23H22O6	394.1416	Gao, J.-M., Yang, S.-X., & Qin, J.-C. (2013). Azaphilones: Chemistry and Biology. Chemical Reviews, 113(7), 4755–4811. doi:10.1021/cr300402y
Polycyclic azaphlilones with lactone ring		colletotrichone A	Colletotrichum sp. BS4	C18H20O7	348.1209	Wang, W.-X., Kusari, S., Laatsch, H., Golz, C., Kusari, P., Strohmann, C., … Spiteller, M. (2016). Antibacterial Azaphilones from an Endophytic Fungus, Colletotrichum sp. BS4. Journal of Natural Products, 79(4), 704–710. doi:10.1021/acs.jnatprod.5b00436
Polycyclic azaphlilones with lactone ring		dechloro-​chaetomugilin A	Chaetomium globosum	C23H28O7	416.1835	Yamada, T., Jinno, M., Kikuchi, T., Kajimoto, T., Numata, A., & Tanaka, R. (2012). Three new azaphilones produced by a marine fish-derived chaetomium globosum. The Journal of Antibiotics, 65(8), 413–417. doi:10.1038/ja.2012.40
Polycyclic azaphlilones with lactone ring		dechloro-​chaetomugilin D	Chaetomium globosum	C23H28O6	400.1886	Yamada, T., Jinno, M., Kikuchi, T., Kajimoto, T., Numata, A., & Tanaka, R. (2012). Three new azaphilones produced by a marine fish-derived chaetomium globosum. The Journal of Antibiotics, 65(8), 413–417. doi:10.1038/ja.2012.40
Polycyclic azaphlilones with lactone ring		fusidilactone C	Fusidium sp. (endophyte)	C22H30O9	438.1890	Gao, J.-M., Yang, S.-X., & Qin, J.-C. (2013). Azaphilones: Chemistry and Biology. Chemical Reviews, 113(7), 4755–4811. doi:10.1021/cr300402y
Polycyclic nitrogen azaphilones		fleephilone	Trichoderma harzianum WC47695	C24H27NO7	441.1788	Gao, J.-M., Yang, S.-X., & Qin, J.-C. (2013). Azaphilones: Chemistry and Biology. Chemical Reviews, 113(7), 4755–4811. doi:10.1021/cr300402y
Polycyclic spiro-azaphilones with aliphatic side chain		berkelic acid	Penicillium sp.	C29H40O9	532.2672	Gao, J.-M., Yang, S.-X., & Qin, J.-C. (2013). Azaphilones: Chemistry and Biology. Chemical Reviews, 113(7), 4755–4811. doi:10.1021/cr300402y
Spiro-azaphilones dimer		cochliodone A	Chaetomium cochliodes VTh01	C34H38O12	638.2363	Gao, J.-M., Yang, S.-X., & Qin, J.-C. (2013). Azaphilones: Chemistry and Biology. Chemical Reviews, 113(7), 4755–4811. doi:10.1021/cr300402y
Spiro-azaphilones dimer		cochliodone B	Chaetomium cochliodes VTh01	C34H38O12	638.2363	Gao, J.-M., Yang, S.-X., & Qin, J.-C. (2013). Azaphilones: Chemistry and Biology. Chemical Reviews, 113(7), 4755–4811. doi:10.1021/cr300402y
Spiro-azaphilones dimer		cochliodone C	Chaetomium cochliodes VTh01	C38H42O16	754.2473	Gao, J.-M., Yang, S.-X., & Qin, J.-C. (2013). Azaphilones: Chemistry and Biology. Chemical Reviews, 113(7), 4755–4811. doi:10.1021/cr300402y
Spiro-azaphilones dimer		cochliodone D	Chaetomium cochliodes VTh01	C38H42O16	754.2473	Gao, J.-M., Yang, S.-X., & Qin, J.-C. (2013). Azaphilones: Chemistry and Biology. Chemical Reviews, 113(7), 4755–4811. doi:10.1021/cr300402y
Spiro-azaphilones with lactone ring		sequoiamonascin A	Aspergillus parasiticus RDWD1-2	C23H30O7	418.1992	Gao, J.-M., Yang, S.-X., & Qin, J.-C. (2013). Azaphilones: Chemistry and Biology. Chemical Reviews, 113(7), 4755–4811. doi:10.1021/cr300402y
Spiro-azaphilones with lactone ring		sequoiamonascin B	Aspergillus parasiticus RDWD1-2	C23H30O7	418.1992	Gao, J.-M., Yang, S.-X., & Qin, J.-C. (2013). Azaphilones: Chemistry and Biology. Chemical Reviews, 113(7), 4755–4811. doi:10.1021/cr300402y
